# Supplementary material for: Synthesis of an STnThr analogue, structurally based on a TnThr antigen mimetic
Source: Royal Society of Chemistry journal article supplement (doi:10.1039/d0ob01749c), 2020-01-01
Supplement: d0ob01749c1.pdf [file d0ob01749c1.pdf]

## Supporting Information for

# Synthesis of a STnThr analogue structurally based on a TnThr antigen mimetic

Francesco Papi,<sup>a</sup> Arnaud Pâris,<sup>b</sup> Pierre Lafite,<sup>b</sup> Richard Daniellou<sup>b</sup> and Cristina Nativi\*<sup>a</sup>

<sup>a</sup>Department of Chemistry, University of Florence, via della Lastruccia, 3-13, 50119 Sesto F.no (FI), Italy; <sup>b</sup>Institut de Chimie Organique et Analytique (ICOA), Université d'Orléans/CNRS, UMR 7311, BP 6759, F-45067, Orléans Cedex 2, France

## Table of contents

|                                             |                                                |
|---------------------------------------------|------------------------------------------------|
| <b>General method</b> .....                 | <b>S2</b>                                      |
| <b>Experimental details and data</b> .....  | <b>S2</b>                                      |
| Synthesis of compound 2 .....               | S2                                             |
| Synthesis of compound 3a.....               | S3                                             |
| Synthesis of compound 3b .....              | S3                                             |
| Synthesis of compound 4 .....               | S4                                             |
| Synthesis of compound 6a.....               | S4                                             |
| Synthesis of compound 7a.....               | S5                                             |
| Synthesis of compound 7b .....              | S5                                             |
| Synthesis of compound 8a.....               | S6                                             |
| Synthesis of compound 8b .....              | S7                                             |
| Synthesis of compound 10 .....              | S7                                             |
| Synthesis of compound 11 .....              | S8                                             |
| Synthesis of compound 12 .....              | S9                                             |
| Synthesis of compound 13 .....              | S9                                             |
| <b>H1N1 Neuraminidase Recognition</b> ..... | <b>S</b> Erreur. Il segnalibro non è definito. |
| H1N1/ Compound 2 complex Modeling.....      | S11                                            |
| <b>NMR and ESI-MS spectra</b> .....         | <b>S12</b>                                     |
| NMR and ESI-MS spectra of compound 2 .....  | S12                                            |
| NMR and ESI-MS spectra of compound 3a.....  | S15                                            |
| NMR and ESI-MS spectra of compound 3b ..... | S18                                            |
| NMR and ESI-MS spectra of compound 4 .....  | S21                                            |
| NMR and ESI-MS spectra of compound 6a.....  | S24                                            |
| NMR and ESI-MS spectra of compound 7a.....  | S27                                            |
| NMR and ESI-MS spectra of compound 7b ..... | S30                                            |
| NMR and ESI-MS spectra of compound 8a.....  | S33                                            |
| NMR and ESI-MS spectra of compound 8b ..... | S37                                            |
| NMR and ESI-MS spectra of compound 10 ..... | S40                                            |
| NMR and ESI-MS spectra of compound 11 ..... | S43                                            |

|                                             |            |
|---------------------------------------------|------------|
| NMR and ESI-MS spectra of compound 12 ..... | S45        |
| NMR and ESI-MS spectra of compound 13 ..... | S48        |
| <b>References .....</b>                     | <b>S50</b> |

## General method

Analytical grade solvents and available reagents were purchased from commercial sources and used without further purification unless noted. For anhydrous reactions, solvent stored over 3 Å molecular sieves were used. Silica gel flash column chromatography purifications were performed using Geduran® Si 60 (0.040-0.063 mm). TLC analyses were performed on glass Merck silica gel 60 F<sub>254</sub> (0.25 mm, E. Merck) plates. NMR spectra were recorded on a 500 MHz Bruker AVANCE II at 298 K. All chemical shifts are reported in parts per million ( $\delta$ ) referenced to residual nondeuterated solvent. Assignments of resonances, including those for mixtures of compounds, were made on the basis of 2D NMR experiments. Multiplicity abbreviation: b = broad, s = singlet, d = doublet, t = triplet, q = quartet, m = multiplet were used. ESI-MS spectra were carried out on a linear ion-trap double quadrupole mass spectrometer using electrospray ionization (ESI) technique (LTQ-XL - Thermo Fisher). HRMS were performed on a LTQ-IT-Orbitrap in either positive or negative modes. Optical rotation measurements were performed on a JASCO DIP-370 polarimeter. Melting point were recorded on a BUCHI 510. Elemental analyses were performed with an Elemental Analyzer 2400 Series II from Perkin-Elmer.

## Experimental details and data

### Synthesis of compound 2

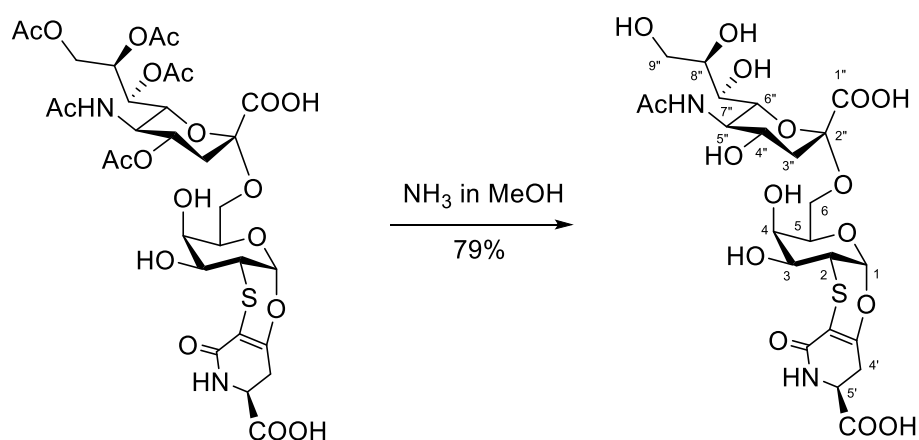

**12** (43 mg, 54.24  $\mu\text{mol}$ ) was solubilized in  $\text{NH}_3$  in MeOH 4M (1 mL) and the reaction was stirred at room temperature. After 4 days, the solvent was removed and the product was purified by several washing with  $\text{Et}_2\text{O}$  to give pure **2** (27 mg, 79 % yield).

ESI-MS  $m/z$  (%): 623.42 (100)  $[\text{M}]^-$ , 311.25 (73)  $[\text{M}]^{-2}$ ,  $[\alpha]^{25}_{\text{D}} = +109.5$  (c 0.001,  $\text{H}_2\text{O}$ ),  $^1\text{H}$  NMR (500 MHz,  $\text{D}_2\text{O}$ )  $\delta$ : 5.72 (d, 1H,  $J_{1,2} = 2.7$  Hz, H-1), 4.23-4.18 (m, 1H, H-5), 4.07-4.03 (m, 1H, H-5'), 3.99-3.95 (m, 1H, H-4), 3.92-3.86 (m, 1H, H-6<sub>a</sub>), 3.86-3.71 (m, 4H, H-3, H-5'', H-8'', H-9''<sub>a</sub>), 3.68-3.48 (m, 5H, H-4'', H-6<sub>b</sub>, H-6'', H-7'', H-9''<sub>b</sub>), 3.41 (dd, 1H,  $J_{2,1} = 2.7$  Hz,  $J_{2,3} = 11.2$  Hz, H-2), 2.89 (dd, 1H,  $J_{4'a,4'b} = 16.9$  Hz,  $J_{4'a,5'} = 6.8$  Hz, H-4'<sub>a</sub>), 2.72-2.58 (m, 2H, H-4'<sub>b</sub>, H-3''<sub>eq</sub>), 1.95 (s, 3H,  $\text{CH}_3$ ), 1.67-1.59 (m, 1H, H-3''<sub>ax</sub>),  $^{13}\text{C}$  NMR (125 MHz,  $\text{D}_2\text{O}$ )  $\delta$ : 177.3 ( $\text{C}_q$ ), 174.9 ( $\text{C}_q$ ), 173.4 ( $\text{C}_q$ ), 167.5 ( $\text{C}_q$ ), 158.3 ( $\text{C}_q$ ), 100.4 ( $\text{C}_q$ ), 96.0 (C-1), 93.7 ( $\text{C}_q$ ), 72.6 (C-6''), 71.9 (C-5), 71.7 (C-8''), 68.4 (C-4), 68.2 (C-7'', C-4''), 65.0 (C-3), 63.7 (C-6), 63.0 (C-9''), 52.8 (C-5'), 51.8 (C-5''), 40.1 (C-3''), 38.0 (C-2), 31.1 (C-4'), 22.0 ( $\text{CH}_3$ ), HRMS (ESI):  $[\text{M}]^-$  calcd for  $\text{C}_{23}\text{H}_{31}\text{N}_2\text{O}_{16}\text{S}^-$ , 623.1400; found, 623.1382; Elemental anal. calcd for  $\text{C}_{23}\text{H}_{32}\text{N}_2\text{O}_{16}\text{S}$ : C, 44.23; H, 5.16; N, 4.49; Found: C, 44.17; H, 5.19; N, 4.43.

### Synthesis of compound 3a

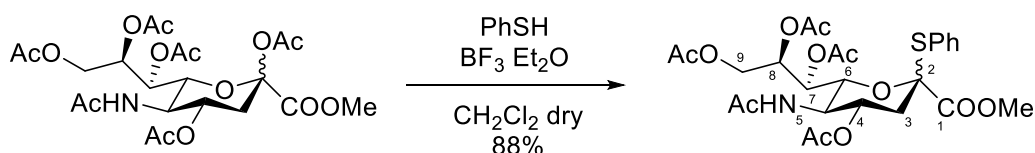

To a solution of **7a** (3.25 g, 6.09 mmol) in  $\text{CH}_2\text{Cl}_2$  dry (50 mL), cooled to 0 °C, PhSH (730 mg, 6.63 mmol) and  $\text{BF}_3\text{Et}_2\text{O}$  (1.01 g, 7.09 mmol) were added and the solution was stirred at room temperature overnight. After complete conversion, the mixture was diluted with  $\text{CH}_2\text{Cl}_2$  and washed with  $\text{NaHCO}_3$  s.s. (x5). The organic layer was dried over  $\text{Na}_2\text{SO}_4$  and concentrated under vacuum. The crude was purified by flash chromatography (DCM/MeOH 9:1) to give **3a** as yellow solid (3.10 g, 88% yield;  $\beta$  anomer 87 % -  $\alpha$  anomer 13 %).

**Characterization of  $\beta$  anomer:** ESI-MS  $m/z$  (%): 606.25 (100)  $[\text{M}+\text{Na}]^+$ ,  $^1\text{H}$  NMR ( $\beta$  anomer) (500 MHz,  $\text{CDCl}_3$ )  $\delta$ : 7.46-7.19 (m, 5H, SPh), 5.56 (d, 1H,  $J_{\text{NH},5} = 10.3$  Hz NH), 5.46 (dd, 1H,  $J_{7,6} = 2.5$  Hz,  $J_{7,8} = 2.3$  Hz, H-7), 5.41-5.34 (m, 1H, H-4), 4.94 (ddd, 1H,  $J_{8,9b} = 8.6$  Hz,  $J_{8,9a} = 2.3$  Hz,  $J_{8,7} = 2.3$  Hz, H-8), 4.62 (dd, 1H,  $J_{6,5} = 10.5$  Hz,  $J_{6,7} = 2.5$  Hz, H-6), 4.48 (dd, 1H,  $J_{9a,9b} = 12.3$  Hz,  $J_{9a,8} = 2.3$  Hz, H-9a), 4.12 (ddd, 1H,  $J_{5,6} = 10.5$  Hz,  $J_{5,4} = 10.4$  Hz,  $J_{5,\text{NH}} = 10.3$  Hz, H-5), 3.99 (dd, 1H,  $J_{9b,9a} = 12.3$  Hz,  $J_{9b,8} = 8.6$  Hz, H-9b), 3.58 (s, 3H,  $\text{OCH}_3$ ), 2.66 (dd, 1H,  $J_{3\text{eq},3\text{ax}} = 13.8$  Hz,  $J_{3\text{eq},4} = 4.8$  Hz, H-3<sub>eq</sub>), 2.16-2.11 (m, 1H, H-3<sub>ax</sub>), 2.09 (s, 3H,  $\text{CH}_3$ ), 2.07 (s, 3H,  $\text{CH}_3$ ), 2.03 (s, 3H,  $\text{CH}_3$ ), 1.95 (s, 3H,  $\text{CH}_3$ ), 1.89 (s, 3H,  $\text{CH}_3$ ),  $^{13}\text{C}$  NMR ( $\beta$  anomer) (125 MHz,  $\text{CDCl}_3$ )  $\delta$ : 171.3 ( $\text{C}_q$ ), 171.1 ( $\text{C}_q$ ), 170.4 ( $\text{C}_q$ ), 170.4 ( $\text{C}_q$ ), 170.3 ( $\text{C}_q$ ), 168.3 (C1), 136.3 (CH, SPh), 129.9 (CH, SPh), 129.2 (CH, SPh), 129.0 ( $\text{C}_q$ , SPh), 89.1 (C-2), 73.3 (C-8, C-6), 69.2 (C-4), 69.0 (C-7), 62.8 (C-9), 52.7 ( $\text{OCH}_3$ ), 49.5 (C-5), 37.6 (C-3), 23.3 ( $\text{CH}_3$ ), 21.2 ( $\text{CH}_3$ ), 21.0 ( $\text{CH}_3$ ), 20.9 ( $\text{CH}_3$ ), 20.8 ( $\text{CH}_3$ ).

### Synthesis of compound 3b

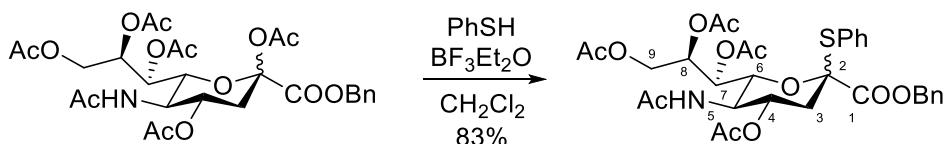

To a solution of **7b** (2.20 g, 3.61 mmol) in  $\text{CH}_2\text{Cl}_2$  dry (25 mL), cooled to 0 °C, PhSH (432 mg, 3.92 mmol) and  $\text{BF}_3\text{Et}_2\text{O}$  (580 mg – 4.09 mmol) were added and the solution was stirred at room temperature, overnight. After complete conversion, the mixture was diluted with  $\text{CH}_2\text{Cl}_2$  and washed with  $\text{NaHCO}_3$  s.s. (x5). The organic layer was dried over  $\text{Na}_2\text{SO}_4$  and concentrated under vacuum. The crude was purified by flash

chromatography (EtOAc/Hexane 8:2) to give **3b** as white solid (1.97 g, 83% yield,  $\beta$  anomer 86 % -  $\alpha$  anomer 14 %).

**Characterization of  $\beta$  anomer:** ESI-MS  $m/z$  (%): 682.17 (100)  $[M+Na]^+$ ,  $^1H$  NMR ( $\beta$  anomer) (500 MHz,  $CDCl_3$ )  $\delta$ : 7.38-7.16 (m, 10H, SPh, Bn), 6.10 (d, 1H,  $J_{NH,5} = 10.3$  Hz NH), 5.47-5.46 (m, 1H, H-7), 5.44-5.38 (m, 1H, H-4), 5.08-5.05 (m, 2H,  $CH_2Bn$ ), 4.90-4.87 (m, 1H, H-8), 4.62 (dd, 1H,  $J_{6,5} = 10.5$  Hz,  $J_{6,7} = 2.7$  Hz, H-6), 4.38 (dd, 1H,  $J_{9a,9b} = 12.3$  Hz,  $J_{9a,8} = 2.4$  Hz, H-9a), 4.19-4.09 (m, 2H, H-5, H-9b), 2.65 (dd, 1H,  $J_{3eq,3ax} = 13.8$  Hz,  $J_{3eq,4} = 4.8$  Hz, H- $3_{eq}$ ), 2.17-2.06 (m, 4H, H- $3_{ax}$ ,  $CH_3$ ), 2.03 (s, 3H,  $CH_3$ ), 2.03 (s, 3H,  $CH_3$ ), 1.94 (s, 3H,  $CH_3$ ), 1.88 (s, 3H,  $CH_3$ ),  $^{13}C$  NMR ( $\beta$  anomer) (125 MHz,  $CDCl_3$ )  $\delta$ : 171.2, 171.0, 170.4, 170.2, 170.2, 167.4, 135.8, 134.9, 129.6, 129.1, 128.7, 128.7, 128.5, 128.5, 88.5 (C-2), 73.1 (C-8, C-6), 69.2 (C-4), 68.8 (C-7), 67.6 ( $CH_2Bn$ ), 62.2 (C-9), 49.1 (C-5), 37.5 (C-3), 23.1 ( $CH_3$ ), 21.0 ( $CH_3$ ), 20.9 ( $CH_3$ ), 20.8 ( $CH_3$ ), 20.7 ( $CH_3$ )

### Synthesis of compound 4

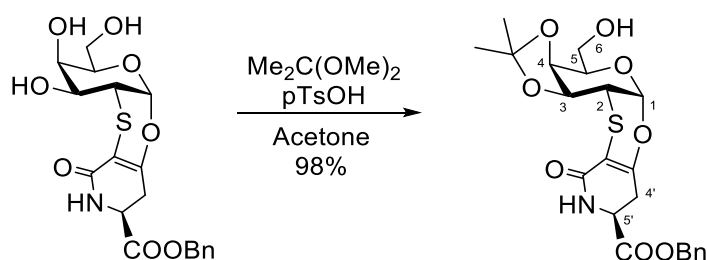

**5** (600 mg, 1.42 mmol) was suspended in acetone (15 mL),  $Me_2C(OMe)_2$  (10.3 g, 99 mmol) and pTsOH (pH 3) were added and the solution was stirred at room temperature for 5 h. After complete conversion, the mixture was quenched with  $Et_3N$  (pH 8), diluted with  $CH_2Cl_2$  and washed with HCl 1M (x4). The organic layer was dried over  $Na_2SO_4$  and concentrated under vacuum. The crude was purified by flash chromatography (EtOAc/MeOH 9:1) to give pure **4** as white solid (628 mg, 98% yield).

ESI-MS  $m/z$  (%): 486.17 (100)  $[M+Na]^+$ , 502.17 (90)  $[M+K]^+$ ,  $[\alpha]^{26}_D = +118.5$  (c 0.001,  $CH_3OD$ ),  $^1H$  NMR (500 MHz,  $DMSO-d_6$ )  $\delta$ : 7.80 (d, 1H,  $J_{NH,5'} = 3.2$  Hz, NH), 7.42-7.31 (m, 5H, Bn), 5.48 (d, 1H,  $J_{1,2} = 2.9$  Hz, H-1), 5.22-5.16 (m, 2H,  $CH_2Bn$ ), 4.38-4.32 (m, 1H, H-5'), 4.24-4.19 (m, 1H, H-5), 4.18-4.15 (m, 1H, H-4), 4.07 (dd, 1H,  $J_{3,2} = 8.7$  Hz,  $J_{3,4} = 5.0$  Hz, H-3), 3.66-3.55 (m, 2H, H-6a, H-6b), 3.17 (dd, 1H,  $J_{2,3} = 8.7$  Hz,  $J_{2,1} = 2.9$  Hz, H-2), 3.06 (dd, 1H,  $J_{4'a,4'b} = 16.7$  Hz,  $J_{4'a,5'} = 7.1$  Hz, H-4'a), 2.61 (dd, 1H,  $J_{4'b,4'a} = 16.7$  Hz,  $J_{4'b,5'} = 5.0$  Hz, H-4'b), 1.45 (s, 3H,  $CH_3$ ), 1.27 (s, 3H,  $CH_3$ ),  $^{13}C$  NMR (125 MHz,  $DMSO-d_6$ )  $\delta$ : 171.7 ( $C_q$ ), 154.7 ( $C_q$ ), 155.5 ( $C_q$ ), 136.2 ( $C_q$ ), 128.9 (CH, Bn), 128.6 (CH, Bn), 128.2 (CH, Bn), 109.1 ( $C_q$ ), 96.6 ( $C_q$ ), 95.2 (CH, C-1), 72.5 (CH, C-3), 72.4 (CH, C-4), 69.9 (CH, C-5), 66.9 ( $CH_2$ ,  $CH_2Ph$ ), 60.9 (CH, C-6), 51.0 (CH, C-5'), 39.11 (CH, C-2), 30.78 ( $CH_2$ , C-4'), 28.51 ( $CH_3$ ), 26.61 ( $CH_3$ ); HRMS (ESI):  $[M+Na]^+$  calcd for  $C_{22}H_{25}NO_8SNa^+$ , 486.1193; found, 489.1174; Elemental anal. calcd for  $C_{22}H_{25}NO_8S$ : C, 57.01; H, 5.44; N, 3.02; Found: C, 56.98; H, 5.47; N, 3.05.

### Synthesis of compound 6a

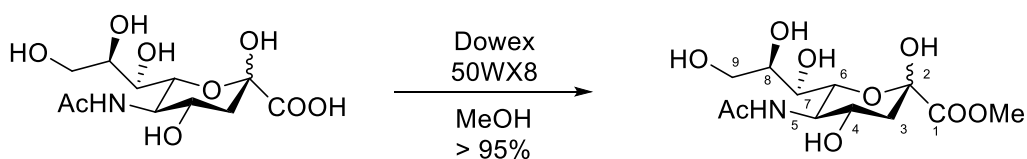

N-acetylneuraminic acid (5.05 g, 16.31 mmol) was suspended in MeOH (170 mL), Dowex 50WX8 (1.5 g) was added and the suspension was stirred at 40 °C. After complete dissolution, Dowex 50WX8 was filtered off and the organic layer was concentrated, under reduce pressure, to give **6a** as white solid (5.06 g, >95% yield;  $\beta$  anomer 93 % -  $\alpha$  anomer 7 %).



**Characterization of  $\beta$  anomer:** ESI-MS  $m/z$  (%): 346.17 (100)  $[M+Na]^+$ , 668.92 (65)  $[M+Na]^{2+}$ , 386.17 (55)  $[M+K]^+$ , 708.83 (35)  $[M+K]^{2+}$ ,  $^1H$  NMR ( $\beta$  anomer) (500 MHz,  $CD_3OD$ )  $\delta$ : 4.08-3.99 (m, 1H, H-4), 3.99 (dd, 1H,  $J_{6,5}=10.1$  Hz,  $J_{6,7}=1.4$  Hz, H-6), 3.84-3.76 (m, 5H, H-5,  $OCH_3$ , H-9<sub>a</sub>), 3.72-3.68 (m, 1H, H-8), 3.62 (dd, 1H,  $J_{9b,9a}=11.2$  Hz,  $J_{9b,8}=5.7$  Hz, H-9<sub>b</sub>), 3.48 (dd, 1H,  $J_{7,8}=9.1$  Hz,  $J_{7,6}=1.4$  Hz, H-7), 2.22 (dd, 1H,  $J_{3eq,3ax}=12.9$  Hz,  $J_{3eq,4}=5.0$  Hz, H-3<sub>eq</sub>), 2.00 (s, 3H, NHAc), 1.89 (dd, 1H,  $J_{3ax,3eq}=12.9$  Hz,  $J_{3ax,4}=11.6$  Hz, H-3<sub>ax</sub>),  $^{13}C$  NMR ( $\beta$  anomer) (125 MHz,  $CD_3OD$ )  $\delta$ : 175.1 (C<sub>q</sub> - NHAc), 171.8 (C-1), 96.7 (C-2), 72.1 (C-6), 71.7 (C-8), 70.2 (C-4), 67.9 (C-7), 64.9 (C-9), 54.3 ( $OCH_3$ ), 53.1 (C-5), 40.7 (C-3), 22.6 (NHAc).

### Synthesis of compound 7a

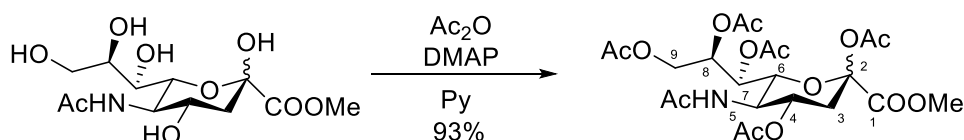

To a solution of **6a** (5.05 g, 15.62 mmol) in pyridine (80 mL),  $Ac_2O$  (10.3 g, 99 mmol) and DMAP (100 mg) were added and the solution was stirred at room temperature overnight. After complete conversion, the mixture was diluted with  $CH_2Cl_2$  and washed with HCl 1M (x5). The organic layer was dried over  $Na_2SO_4$  and concentrated under vacuum. The crude was purified by flash chromatography (DCM/MeOH 9:1) to give **7a** as white solid (7.73 g, 93% yield,  $\beta$  anomer > 90 %).

**Characterization of  $\beta$  anomer:** ESI-MS  $m/z$  (%): 556.17 (100)  $[M+Na]^+$ , 572.17 (35)  $[M+K]^+$ ,  $^1H$  NMR ( $\beta$  anomer) (500 MHz,  $CDCl_3$ )  $\delta$ : 5.40-5.35 (m, 2H, NH, H-7), 5.27-5.20 (m, 1H, H-4), 5.07-5.04 (m, 1H, H-8), 4.48 (dd, 1H,  $J_{9a,9b}=12.4$  Hz,  $J_{9a,8}=2.6$  Hz, H-9<sub>a</sub>), 4.14-4.07 (m, 3H, H-5, H-6, H-9<sub>b</sub>), 3.80 (s, 3H,  $OCH_3$ ), 2.53 (dd, 1H,  $J_{3eq,3ax}=13.6$  Hz,  $J_{3eq,4}=5.0$  Hz, H-3<sub>eq</sub>), 2.34 (s, 3H,  $CH_3$ ), 2.13 (s, 3H,  $CH_3$ ), 2.11-2.07 (m, 1H, H-3<sub>ax</sub>), 2.09 (s, 3H,  $CH_3$ ), 2.02 (s, 3H,  $CH_3$ ), 2.02 (s, 3H,  $CH_3$ ), 1.88 (s, 3H,  $CH_3$ ),  $^{13}C$  NMR ( $\beta$  anomer) (125 MHz,  $CDCl_3$ )  $\delta$ : 171.1 (C<sub>q</sub>), 171.1 (C<sub>q</sub>), 170.7 (C<sub>q</sub>), 170.4 (2C<sub>q</sub>), 170.3 (C<sub>q</sub>), 168.3 (C<sub>q</sub>), 166.4 (C<sub>q</sub>), 97.6 (C-2), 72.97 (C-6), 71.5 (C-8), 68.4 (C-4), 67.9 (C-7), 62.2 (C-9), 53.3 ( $OCH_3$ ), 49.4 (C-5), 36.0 (C-3), 23.3 ( $CH_3$ ), 21.1 ( $CH_3$ ), 21.0 ( $CH_3$ ), 20.9 (2 $CH_3$ ), 20.8 ( $CH_3$ ).

### Synthesis of compound 7b

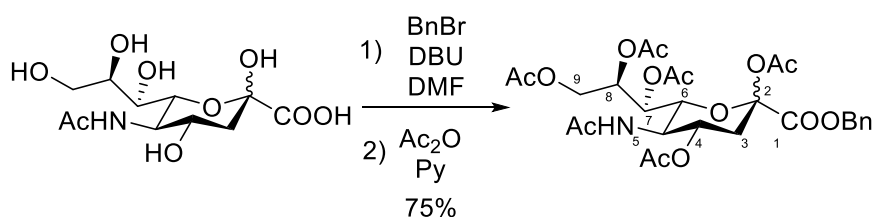

To a suspension of N-acetylneuraminic acid (5.00 g, 16.16 mmol) in DMF (25 mL) cooled to  $-0$  °C, DBU (3.91 g, 25.72 mmol) and BnBr (4.40 g, 25.72 mmol) were added and the mixture was stirred at room temperature overnight. After complete conversion, the solvent was removed *in vacuo*. Crude **6b** was dissolved in pyridine/ $Ac_2O$  2:1 (100 mL) and a catalitical amount of DMAP was added. After overnight, the reaction was diluted with  $CH_2Cl_2$  and washed with HCl 1M (x5). The organic layer was dried over  $Na_2SO_4$  and concentrated under vacuum. The crude was purified by flash chromatography (DCM/MeOH 9:1) to give **7b** (7.39 g, 75% yield;  $\beta$  anomer > 90 %).

**Characterization of  $\beta$  anomer:** ESI-MS  $m/z$  (%): 632.17 (100)  $[M+Na]^+$ ,  $^1H$  NMR ( $\beta$  anomer) (500 MHz,  $CDCl_3$ )  $\delta$ : 7.41-7.33 (m, 5H, Bn), 5.42-5.33 (m, 2H, NH, H-7), 5.31-5.16 (m, 3H, H-4,  $CH_2Bn$ ), 5.13-5.08 (m, 1H, H-8), 4.46 (dd, 1H,  $J_{9a,9b}=12.6$  Hz,  $J_{9a,8}=2.6$  Hz, H-9<sub>a</sub>), 4.21-4.07 (m, 3H, H-5, H-6, H-9<sub>b</sub>), 2.57 (dd, 1H,  $J_{3eq,3ax}=13.6$

Hz,  $J_{3eq,4} = 5.2$  Hz, H- $3_{eq}$ ), 2.14 (s, 3H, CH<sub>3</sub>), 2.13-2.07 (m, 4H, H- $3_{ax}$ , CH<sub>3</sub>), 2.05-2.03 (s, 9H, CH<sub>3</sub>, CH<sub>3</sub>, CH<sub>3</sub>), 1.91 (s, 3H, CH<sub>3</sub>), <sup>13</sup>C NMR (β anomer) (125 MHz, CDCl<sub>3</sub>) δ: 171.0 (C<sub>q</sub>), 170.5 (C<sub>q</sub>), 170.3 (C<sub>q</sub>), 170.2 (2C<sub>q</sub>), 168.3 (C<sub>q</sub>), 165.5 (C<sub>q</sub>), 134.9 (C<sub>q</sub>), 128.6 (CH-Bn), 128.5 (CH-Bn), 128.3 (CH-Bn) 97.7 (C-2), 72.9 (C-6), 71.2 (C-8), 68.3 (C-4), 68.0 (CH<sub>2</sub>-Bn), 67.8 (C-7), 62.0 (C-9), 49.4 (C-5), 35.8 (C-3), 23.2 (CH<sub>3</sub>), 20.9 (CH<sub>3</sub>), 20.8 (3CH<sub>3</sub>), 20.7 (CH<sub>3</sub>).

### Synthesis of compound 8a

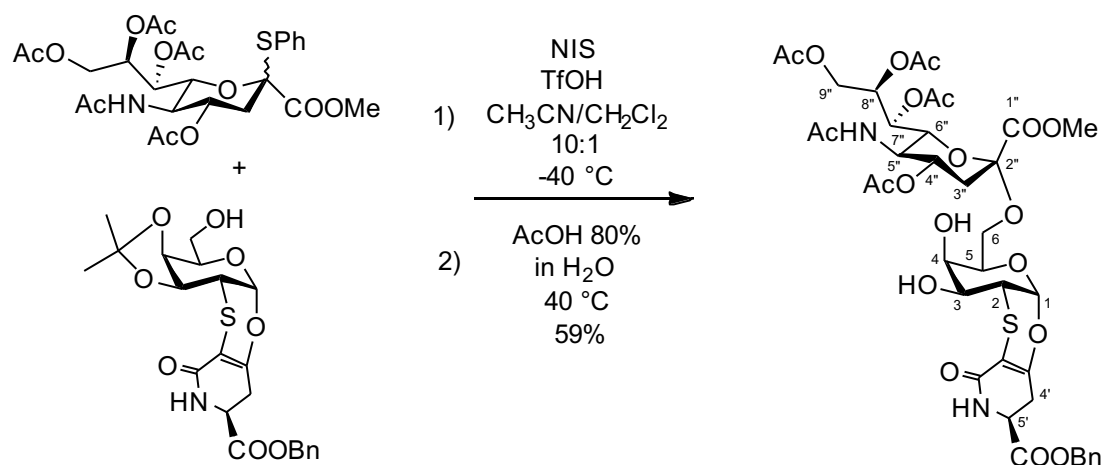

To a suspension of **4** (500 mg, 1.08 mmol) and **3a** (1.50 g, 2.57 mmol) in a mixture of CH<sub>3</sub>CN/CH<sub>2</sub>Cl<sub>2</sub> dry 10:1 (10 mL) cooled to -40 °C, NIS (1.04 g, 4.62 mmol) and TfOH (203 mg, 1.35 mmol) were added and the solution was stirred at -40 °C under an N<sub>2</sub> atmosphere. After 2 h, the reaction was quenched with Et<sub>3</sub>N (pH 8), diluted with CH<sub>2</sub>Cl<sub>2</sub> and washed with Na<sub>2</sub>S<sub>2</sub>O<sub>3</sub> 1 M (x3). The organic layer was dried over Na<sub>2</sub>SO<sub>4</sub> and concentrated under vacuum. The crude was solubilized in AcOH 80% in H<sub>2</sub>O (20 mL) and the reaction was stirred overnight at 40 °C. The solvent was removed *in vacuo* and the product was purified by flash chromatography (EtOAc/MeOH 98:2) affording **8a** (571 mg, 59 % yield calculated over 2 steps; α anomer 90 % - β anomer 10 %).

**Characterization of α anomer:** ESI-MS *m/z* (%): 919.42 (100) [M+Na]<sup>+</sup>, 935.42 (90) [M+K]<sup>+</sup>, <sup>1</sup>H NMR (α anomer) (500 MHz, CDCl<sub>3</sub>) δ: 7.37-7.27 (m, 5H, Bn), 6.71 (bs, 1H, NH), 5.71 (d, 1H,  $J_{NH,5''} = 9.8$  Hz, NH), 5.57 (d, 1H,  $J_{1,2} = 2.7$  Hz, H-1), 5.37-5.33 (m, 1H, H-8''), 5.31-5.28 (m, 1H, H-7''), 5.21-5.14 (m, 2H, CH<sub>2</sub>Bn), 4.91-4.81 (m, 1H, H-4''), 4.38-4.27 (m, 2H, H-5', H-9''<sub>a</sub>), 4.19-3.98 (m, 5H, H-4, H-5, H-5'', H-6'', H-9''<sub>b</sub>), 3.95-3.86 (m, 1H, H-6<sub>a</sub>), 3.78 (s, 1H, OCH<sub>3</sub>), 3.72-3.63 (m, 2H, H-3, H-6<sub>b</sub>), 3.48 (dd, 1H, 1H,  $J_{2,1} = 2.7$  Hz,  $J_{2,3} = 10.7$  Hz, H-2), 2.95-2.87 (m, 1H, H-4''<sub>a</sub>), 2.80-2.71 (m, 1H, H-4''<sub>b</sub>), 2.57 (dd, 1H,  $J_{3''eq,3''ax} = 12.8$  Hz,  $J_{3''eq,4''} = 4.6$  Hz, H-3''<sub>eq</sub>), 2.10 (s, 3H, CH<sub>3</sub>), 2.09 (s, 3H, CH<sub>3</sub>), 1.98-1.90 (m, 1H, H-3''<sub>ax</sub>), 2.00 (s, 3H, CH<sub>3</sub>), 1.99 (s, 3H, CH<sub>3</sub>), 1.85 (s, 3H, CH<sub>3</sub>), <sup>13</sup>C NMR (α anomer) (125 MHz, CDCl<sub>3</sub>) δ: 171.0, 170.6, 170.4, 170.2, 169.8, 168.2, 165.8, 155.9, 134.9, 128.8, 128.4, 98.8, 96.5 (C-1), 96.3, 72.8, 71.3, 69.2 (C-8''), 69.1 (C-4''), 67.9, 67.8 (CH<sub>2</sub>Bn), 67.6 (C-7''), 65.7 (C-3), 63.2 (C-6), 62.7 (C-9''), 53.1 (OCH<sub>3</sub>), 51.4 (C-5'), 49.2, 39.1 (C-2), 37.4 (C-3''), 30.7 (C-4'), 23.2 (CH<sub>3</sub>), 21.1 (CH<sub>3</sub>), 20.9 (CH<sub>3</sub>), 20.9 (CH<sub>3</sub>), 20.8 (CH<sub>3</sub>).

## Synthesis of compound 8b

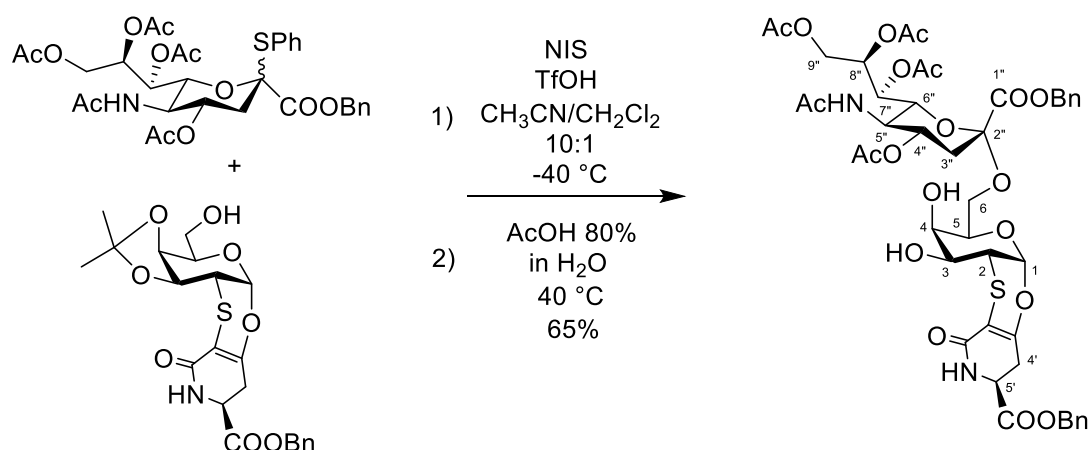

To a suspension of **4** (134 mg, 0.29 mmol) and **3b** (460 mg, 0.69 mmol) in a mixture of  $\text{CH}_3\text{CN}/\text{CH}_2\text{Cl}_2$  dry 10:1 (3 mL) cooled to  $-40\text{ }^\circ\text{C}$ , NIS (260 mg, 0.29 mmol) and TfOH (86 mg, 0.57 mmol) were added and the solution was stirred at  $-40\text{ }^\circ\text{C}$  under an  $\text{N}_2$  atmosphere. After 2 h, the reaction was quenched with  $\text{Et}_3\text{N}$  (pH 8), diluted with  $\text{CH}_2\text{Cl}_2$  and washed with  $\text{Na}_2\text{S}_2\text{O}_3$  1 M (x3). The organic layer was dried over  $\text{Na}_2\text{SO}_4$  and concentrated under vacuum. The crude was solubilized in AcOH 80% in  $\text{H}_2\text{O}$  (10 mL) and the reaction was stirred overnight at  $40\text{ }^\circ\text{C}$ . The solvent was removed *in vacuo* and the product was purified by flash chromatography (EtOAc/MeOH 98:2) to give **8b** (183 mg, 65 % yield calculated over 2 steps >95%; pure by  $^1\text{H}$  NMR)

ESI-MS  $m/z$  (%): 995.17 (100)  $[\text{M}+\text{Na}]^+$ , 1011.17 (35)  $[\text{M}+\text{K}]^+$ ,  $[\alpha]^{24}_{\text{D}} = +112.3$  (c 0.001,  $\text{CHCl}_3$ ),  $^1\text{H}$  NMR ( $\alpha$  anomer) (500 MHz,  $\text{CDCl}_3$ )  $\delta$ : 7.42-7.34 (m, 5H, Bn), 6.21 (bs, 1H, NH), 5.61 (d, 1H,  $J_{\text{NH},5''} = 9.8$  Hz, NH), 5.61 (d, 1H,  $J_{1,2} = 2.7$  Hz, H-1), 5.40-5.28 (m, 3H, NH, H-7'', H-8''), 5.27-5.19 (m, 4H,  $\text{CH}_2\text{Bn}$ ,  $\text{CH}_2\text{Bn}$ ), 4.93-4.84 (m, 1H, H-4''), 4.40 (dd, 1H,  $J_{9''\text{a},9''\text{b}} = 12.6$  Hz,  $J_{9\text{a},8} = 2.6$  Hz, H-9''<sub>a</sub>), 4.36-4.30 (m, 1H, H-5'), 4.18-3.93 (m, 6H, H-4, H-5, H-5'', H-6<sub>a</sub>, H-6'', H-9''<sub>b</sub>), 3.73-3.63 (m, 2H, H-3, H-6<sub>b</sub>), 3.53 (dd, 1H, 1H,  $J_{2,1} = 2.7$  Hz,  $J_{2,3} = 10.7$  Hz, H-2), 3.44 (bs, 1H, OH), 3.15 (bs, 1H, OH), 2.95-2.86 (m, 1H, H-4''<sub>a</sub>), 2.85-2.75 (m, 1H, H-4''<sub>b</sub>), 2.66 (dd, 1H,  $J_{3''\text{eq},3''\text{ax}} = 12.8$  Hz,  $J_{3''\text{eq},4''} = 4.6$  Hz, H-3''<sub>eq</sub>), 2.15 (s, 3H,  $\text{CH}_3$ ), 2.14 (s, 3H,  $\text{CH}_3$ ), 2.05-2.03 (m, 7H, H-3''<sub>ax</sub>, 2 $\text{CH}_3$ ), 1.89 (s, 3H,  $\text{CH}_3$ ),  $^{13}\text{C}$  NMR ( $\alpha$  anomer) (125 MHz,  $\text{CDCl}_3$ )  $\delta$ : 171.1, 170.8, 170.4, 170.3, 170.2, 169.5, 167.5, 165.1, 155.5, 134.8, 134.7, 128.8-128.4 (5C), 98.8, 96.6 (C-1), 96.2, 72.9, 71.3, 69.1 (C-8''), 68.9 (C-4''), 68.0, 67.9 (2C), 67.5 (C-7''), 65.7 (C-3), 63.5 (C-6), 62.7 (C-9''), 51.4 (C-5'), 49.2, 39.2 (C-2), 37.3 (C-3''), 30.7 (C-4'), 23.2 ( $\text{CH}_3$ ), 21.1 ( $\text{CH}_3$ ), 20.8-20.7 (3 $\text{CH}_3$ ).

## Synthesis of compound 10

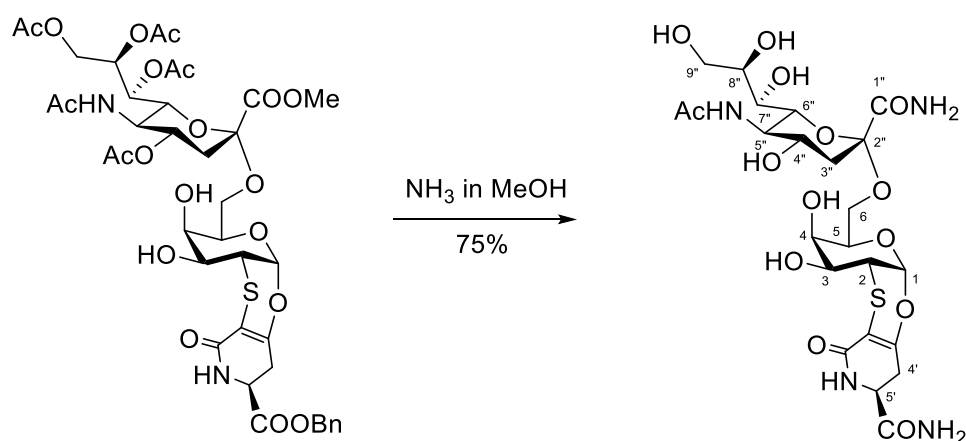

**8a** (50 mg, 55.75  $\mu\text{mol}$ ) was solubilized in  $\text{NH}_3$  in MeOH 4M (1 mL) and the reaction was stirred at room temperature. After 4 days, the solvent was removed and the product was purified by several washing with  $\text{Et}_2\text{O}$  to give pure **10** (26 mg, 75 % yield).

ESI-MS  $m/z$  (%): 621.33 (100)  $[\text{M}]^-$ ,  $[\alpha]_{\text{D}}^{25} = +111.2$  (c 0.001,  $\text{H}_2\text{O}$ ),  $^1\text{H}$  NMR (500 MHz,  $\text{D}_2\text{O}$ )  $\delta$ : 5.85 (d, 1H,  $J_{1,2} = 2.7$  Hz, H-1), 4.37-4.34 (m, 1H, H-5'), 4.33-4.28 (m, 1H, H-5), 4.10-4.07 (m, 1H, H-4), 4.03-3.94 (m, 2H, H-5'', H-6<sub>a</sub>), 3.93-3.83 (m, 3H, H-6'', H-8'', H-9''<sub>a</sub>), 3.82-3.75 (m, 3H, H-3, H-4'', H-6<sub>b</sub>), 3.73-3.66 (m, 2H, H-7'', H-9''<sub>b</sub>), 3.53 (dd, 1H,  $J_{2,1} = 2.7$  Hz,  $J_{2,3} = 11.2$  Hz, H-2), 3.14 (dd, 1H,  $J_{4'a,4'b} = 17.1$  Hz,  $J_{4'a,5'} = 7.5$  Hz, H-4'<sub>a</sub>), 2.84 (dd, 1H,  $J_{4'b,4'a} = 17.1$  Hz,  $J_{4'b,5'} = 5.7$  Hz, H-4'<sub>b</sub>), 2.77 (dd, 1H,  $J_{3''\text{eq},3''\text{ax}} = 13.1$  Hz,  $J_{3''\text{eq},4''} = 4.7$  Hz, H-3''<sub>eq</sub>), 2.08 (s, 3H,  $\text{CH}_3$ ), 1.90-1.82 (m, 1H, H-3''<sub>ax</sub>),  $^{13}\text{C}$  NMR (125 MHz,  $\text{D}_2\text{O}$ )  $\delta$ : 175.7 ( $\text{C}_q$ ), 175.1 ( $\text{C}_q$ ), 171.7 ( $\text{C}_q$ ), 167.4 ( $\text{C}_q$ ), 157.6 ( $\text{C}_q$ ), 99.5 ( $\text{C}_q$ ), 96.3 (C-1), 94.2 ( $\text{C}_q$ ), 73.5 (C-6''), 71.9 (C-5), 71.0 (C-8''), 68.4 (C-4), 67.7 (C-7''), 67.1 (C-4''), 65.2 (C-3), 63.2 (C-6), 63.0 (C-9''), 51.7 (C-5''), 51.2 (C-5'), 38.3 (C-3''), 37.9 (C-2), 30.4 (C-4'), 22.1 ( $\text{CH}_3$ ); HRMS (ESI):  $[\text{M}]^-$  calcd for  $\text{C}_{23}\text{H}_{33}\text{N}_4\text{O}_{14}\text{S}^-$ , 621.1719; found, 621.1702; Elemental anal. calcd for  $\text{C}_{23}\text{H}_{34}\text{N}_4\text{O}_{14}\text{S}$ : C, 44.37; H, 5.50; N, 9.00; Found: C, 44.41; H, 5.46; N, 9.05.

### Synthesis of compound 11

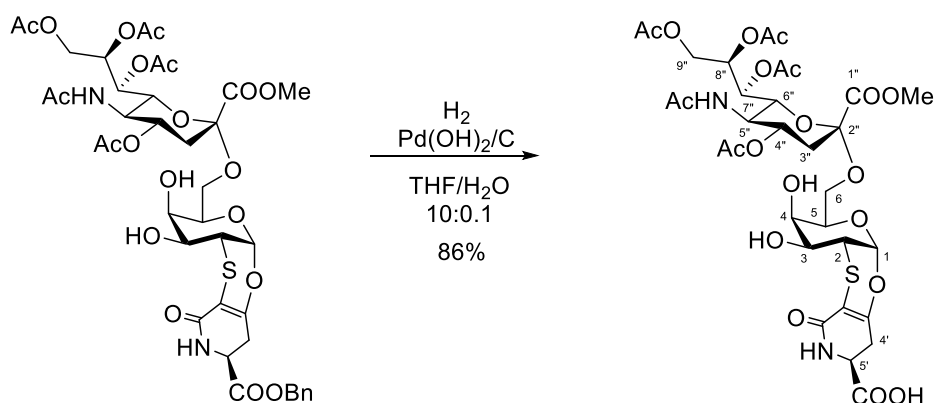

**8a** (100 mg, 0.11 mmol) was solubilized in THF/ $\text{H}_2\text{O}$  10:0.1 (2 mL)  $\text{Pd}(\text{OH})_2/\text{C}$  (20 wt.%, 10 mg) was added and the reaction was stirred at room temperature, under  $\text{H}_2$  atmosphere. After complete conversion, the suspension was filtered through a pad of Celite<sup>(R)</sup>, the solvents were removed and the crude was purified by flash chromatography ( $\text{CH}_2\text{Cl}_2/\text{MeOH}$  8:2) to give pure **11** (77 mg, 86 % yield).

ESI-MS  $m/z$  (%): 805.67 (100)  $[\text{M}]^-$ ,  $[\alpha]_{\text{D}}^{26} = +107.6$  (c 0.002,  $\text{CH}_3\text{OH}$ ),  $^1\text{H}$  NMR (500 MHz,  $\text{CD}_3\text{OD}$ )  $\delta$ : 5.69-5.62 (m, 1H, H-1), 5.45-5.37 (m, 1H, H-8''), 5.37-5.36 (m, 1H, H-7''), 4.84-4.79 (m, 1H, H-4''), 4.38-4.31 (m, 1H, H-9''<sub>a</sub>), 4.19-4.06 (m, 4H, H-5, H-5', H-6'', H-9''<sub>b</sub>), 4.02-3.90 (m, 3H, H-4, H-5'', H-6<sub>a</sub>), 3.86 (s, 1H,  $\text{OCH}_3$ ), 3.78-3.70 (m, 1H, H-3), 3.69-3.60 (m, 1H, H-6<sub>b</sub>), 3.50-3.43 (m, 1H, H-2), 2.91-2.81 (m, 1H, H-4''<sub>a</sub>), 2.79-2.70 (m, 1H, H-4''<sub>b</sub>), 2.70-2.62 (m, 1H, H-3''<sub>eq</sub>), 2.14 (s, 3H,  $\text{CH}_3$ ), 2.12 (s, 3H,  $\text{CH}_3$ ), 2.02 (s, 3H,  $\text{CH}_3$ ), 2.00 (s, 3H,  $\text{CH}_3$ ), 1.90-1.80 (m, 4H, H-3''<sub>ax</sub>,  $\text{CH}_3$ )

## Synthesis of compound 12

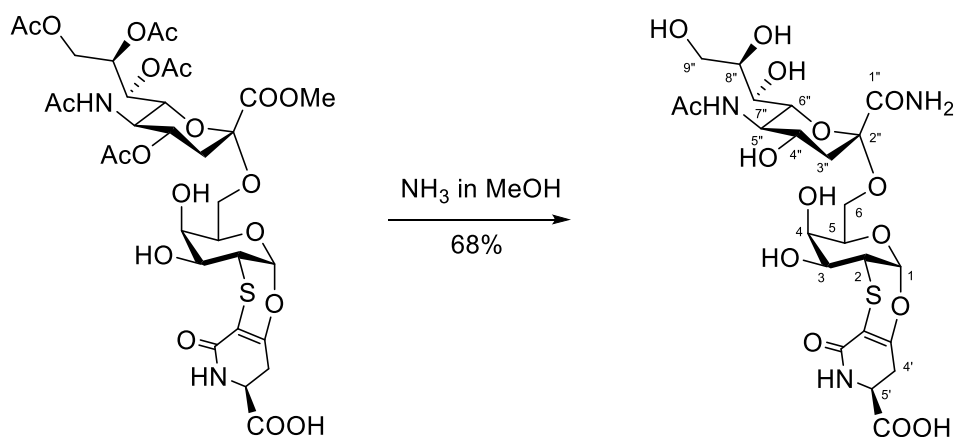

**11** (31 mg, 38.42  $\mu\text{mol}$ ) was solubilized in  $\text{NH}_3$  in MeOH 4M (1 mL) and the reaction was stirred at room temperature. After 4 days, the solvent was removed and the product was purified by several washing with  $\text{Et}_2\text{O}$  to give pure **12** (16 mg, 68 % yield).

ESI-MS  $m/z$  (%): 622.33 (100)  $[\text{M}]^-$ ,  $[\alpha]^{25}_{\text{D}} = +109.1$  (c 0.001,  $\text{H}_2\text{O}$ ),  $^1\text{H}$  NMR (500 MHz,  $\text{D}_2\text{O}$ )  $\delta$ : 5.81 (d, 1H,  $J_{1,2} = 2.7$  Hz, H-1), 4.34-4.29 (m, 1H, H-5), 4.17-4.12 (m, 1H, H-5'), 4.08-4.05 (m, 1H, H-4), 4.01-3.73 (m, 8H, H-3, H-4'', H-5'', H-6<sub>a</sub>, H-6<sub>b</sub>, H-6'', H-8'', H-9''<sub>a</sub>), 3.72-3.62 (m, 2H, H-7'', H-9''<sub>b</sub>), 3.51 (dd, 1H,  $J_{2,1} = 2.7$  Hz,  $J_{2,3} = 11.2$  Hz, H-2), 2.96 (dd, 1H,  $J_{4'a,4'b} = 16.9$  Hz,  $J_{4'a,5'} = 6.8$  Hz, H-4'<sub>a</sub>), 2.81-2.71 (m, 2H, H-4'<sub>b</sub>, H-3''<sub>eq</sub>), 2.05 (s, 3H,  $\text{CH}_3$ ), 1.88-1.80 (m, 1H, H-3''<sub>ax</sub>),  $^{13}\text{C}$  NMR (125 MHz,  $\text{D}_2\text{O}$ )  $\delta$ : 177.3 ( $\text{C}_q$ ), 175.0 ( $\text{C}_q$ ), 171.7 ( $\text{C}_q$ ), 167.5 ( $\text{C}_q$ ), 158.2 ( $\text{C}_q$ ), 99.5 ( $\text{C}_q$ ), 96.1 (C-1), 93.9 ( $\text{C}_q$ ), 73.4 (C-6''), 71.8 (C-5), 71.0 (C-8''), 68.4 (C-4), 67.7 (C-7''), 67.1 (C-4''), 65.1 (C-3), 63.2 (C-6), 63.0 (C-9''), 52.9 (C-5''), 51.6 (C-5'), 38.2 (C-3''), 38.1 (C-2), 31.2 (C-4'), 22.0 ( $\text{CH}_3$ ); HRMS (ESI):  $[\text{M}]^-$  calcd for  $\text{C}_{23}\text{H}_{32}\text{N}_3\text{O}_{15}\text{S}^-$  622.1560; found, 622.1583; Elemental anal. calcd for  $\text{C}_{23}\text{H}_{33}\text{N}_3\text{O}_{15}\text{S}$ : C, 44.30; H, 5.33; N, 6.74; Found: C, 44.24; H, 5.36; N, 6.82.

## Synthesis of compound 13

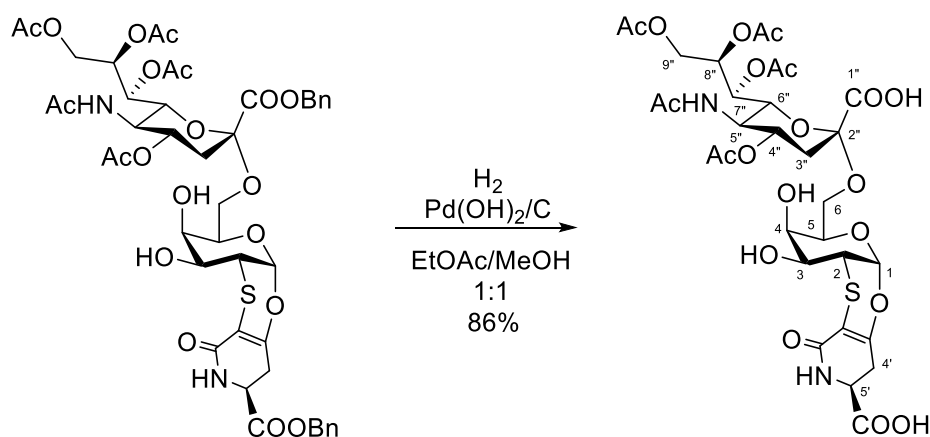

**8b** (90 mg, 92.50  $\mu\text{mol}$ ) was solubilized in EtOAc/MeOH 1:1 (1 mL)  $\text{Pd(OH)}_2/\text{C}$  (20 wt.%, 9 mg) was added and the reaction was stirred under  $\text{H}_2$  atmosphere at room temperature. After complete conversion, the suspension was filtered through a pad of Celite<sup>(R)</sup>, the solvents were removed to give **13** (60 mg, 86 % yield).

ESI-MS  $m/z$  (%): 791.75 (100)  $[\text{M}]^-$ ,  $[\alpha]^{25}_{\text{D}} = +110.6$  (c 0.001,  $\text{CH}_3\text{OH}$ ),  $^1\text{H}$  NMR (500 MHz,  $\text{CD}_3\text{OD}$ )  $\delta$ : 5.67 (d, 1H,  $J_{1,2} = 2.7$  Hz, H-1), 5.40-5.37 (m, 1H, H-8''), 5.37-5.33 (m, 1H, H-7''), 5.04-4.96 (m, 1H, H-4''), 4.59-4.53 (m, 1H, H-6''), 4.40 (dd, 1H,  $J_{9''a,9''b} = 12.4$  Hz,  $J_{9a,8} = 2.7$  Hz, H-9''<sub>a</sub>), 4.23-4.14 (m, 3H, H-5, H-5', H-9''<sub>b</sub>), 4.06-4.03 (m,

1H, H-4), 4.00-3.89 (m, 2H, H-5", H-6<sub>a</sub>), 3.76-3.66 (m, 2H, H-3, H-6<sub>b</sub>), 3.48 (dd, 1H, 1H,  $J_{2,1} = 2.9$  Hz,  $J_{2,3} = 11.1$  Hz, H-2), 3.00-2.92 (m, 1H, H-4"<sub>a</sub>), 2.81-2.73 (m, 1H, H-4"<sub>b</sub>), 2.64 (dd, 1H,  $J_{3''_{eq},3''_{ax}} = 12.4$  Hz,  $J_{3''_{eq},4''} = 4.6$  Hz, H-3''<sub>eq</sub>), 2.12 (s, 3H, CH<sub>3</sub>), 2.11 (s, 3H, CH<sub>3</sub>), 2.03 (s, 3H, CH<sub>3</sub>), 1.98 (s, 3H, CH<sub>3</sub>), 1.85 (s, 3H, CH<sub>3</sub>), 1.79-1.69 (m, 1H, H-3''<sub>ax</sub>)

## H1N1/ Compound 2 complex Modeling

H1N1 neuraminidase structure bound to zanamivir (PDB 3B7E)[1] was used as a starting template for complex generation. Topology and parameters files for compound **2** were obtained by Antechamber program using AM1-BCC charges[2]. The complex model was then immersed in a periodic water box (TIP3) and neutralized by adding Na<sup>+</sup> ions. This model was initially equilibrated by several cycles of minimizations (10000 steps, steepest descent) and Molecular Dynamics (50 ps, 200K). Then the protein backbone was constrained and the ligand was docked into H1N1 active site by Soft-Restrained Molecular Dynamics, using Zanamivir coordinates in 3B7E structure as template [3]. Finally, complex was equilibrated and energy minimized using minimization/dynamics cycles without restrained. All computational studies were performed using Amber ff14SB forcefield [4] with NAMD software[5].

# NMR and ESI-MS spectra

## NMR and ESI-MS spectra of compound 2

T: ITMS - p ESI Full ms [150.00-2000.00]

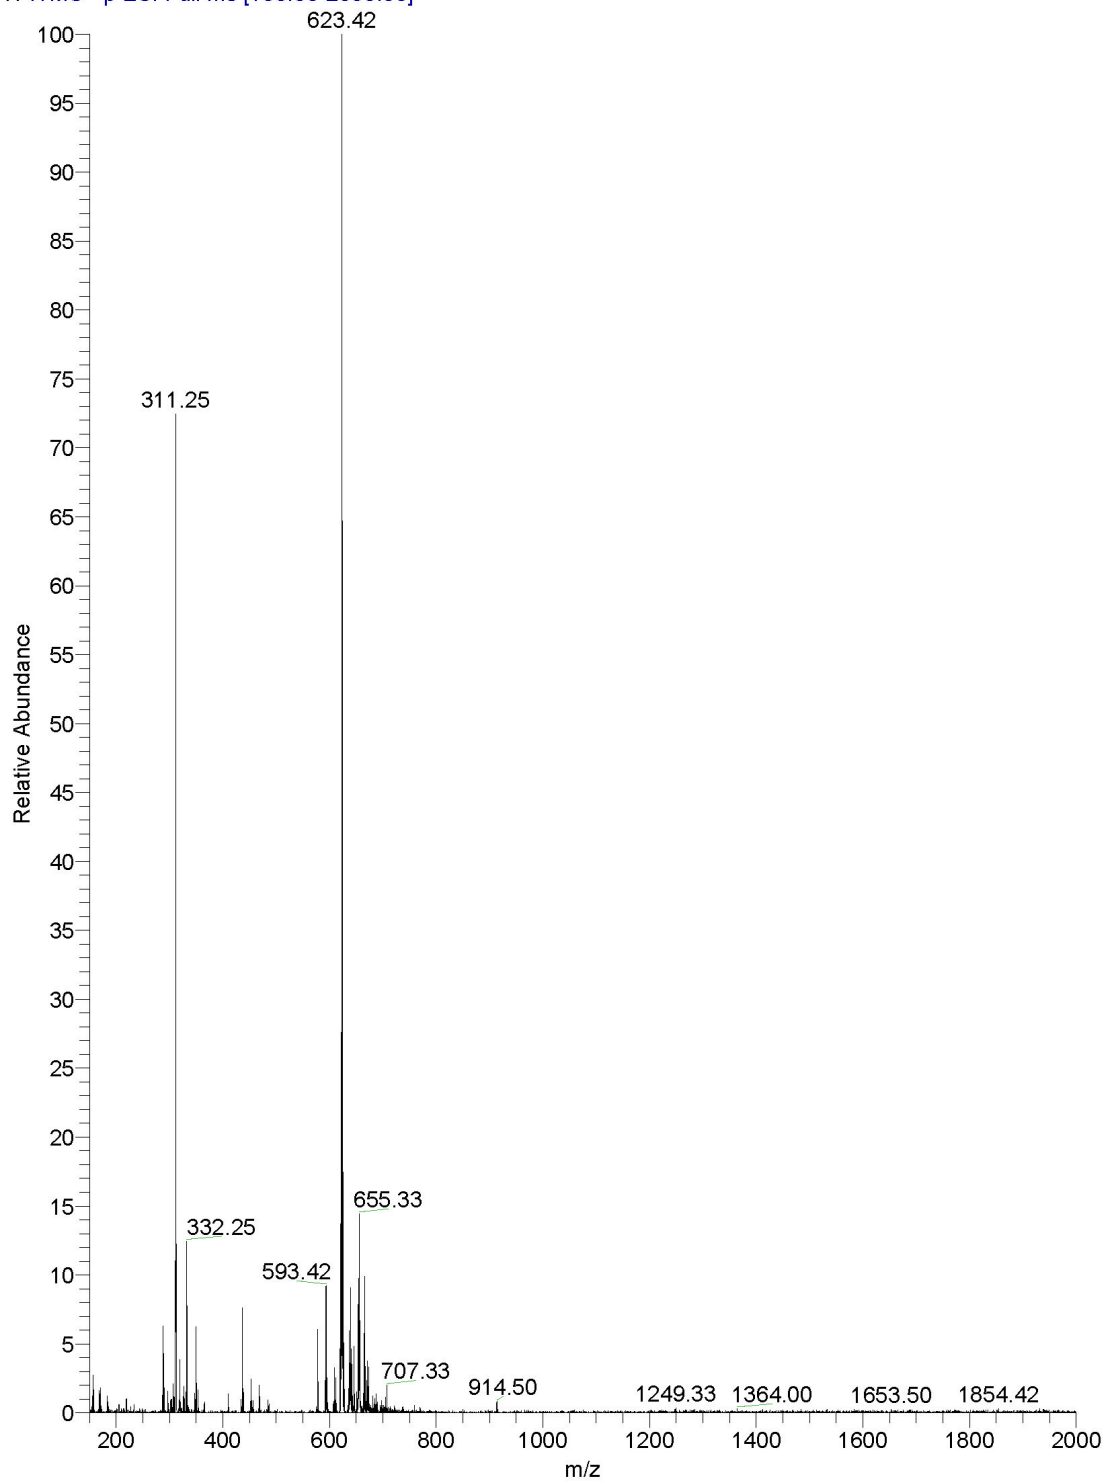



$^1\text{H}$  at 500 MHz in  $\text{D}_2\text{O}$  - 25 deg

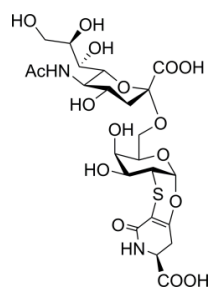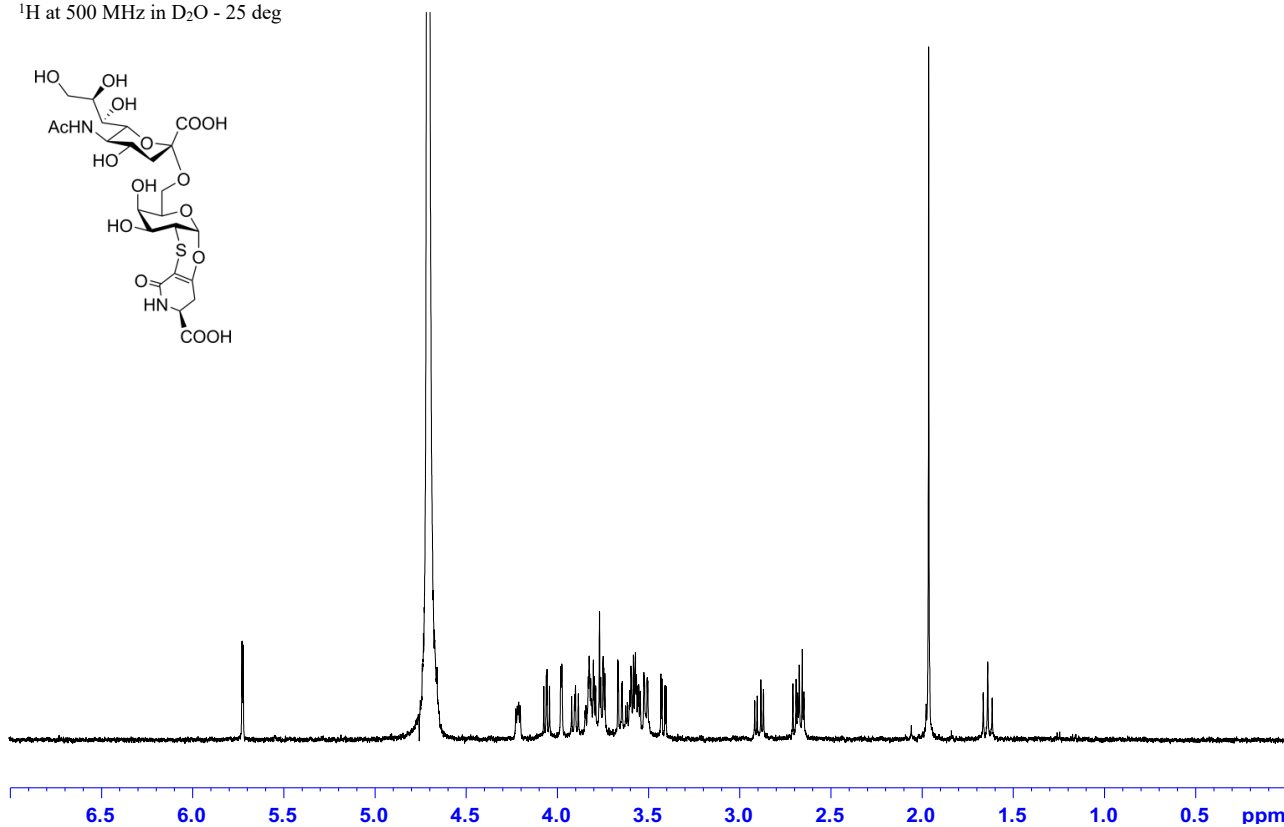

$^{13}\text{C}$  at 125 MHz in  $\text{D}_2\text{O}$  - 25 deg

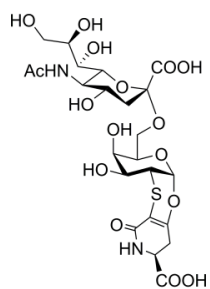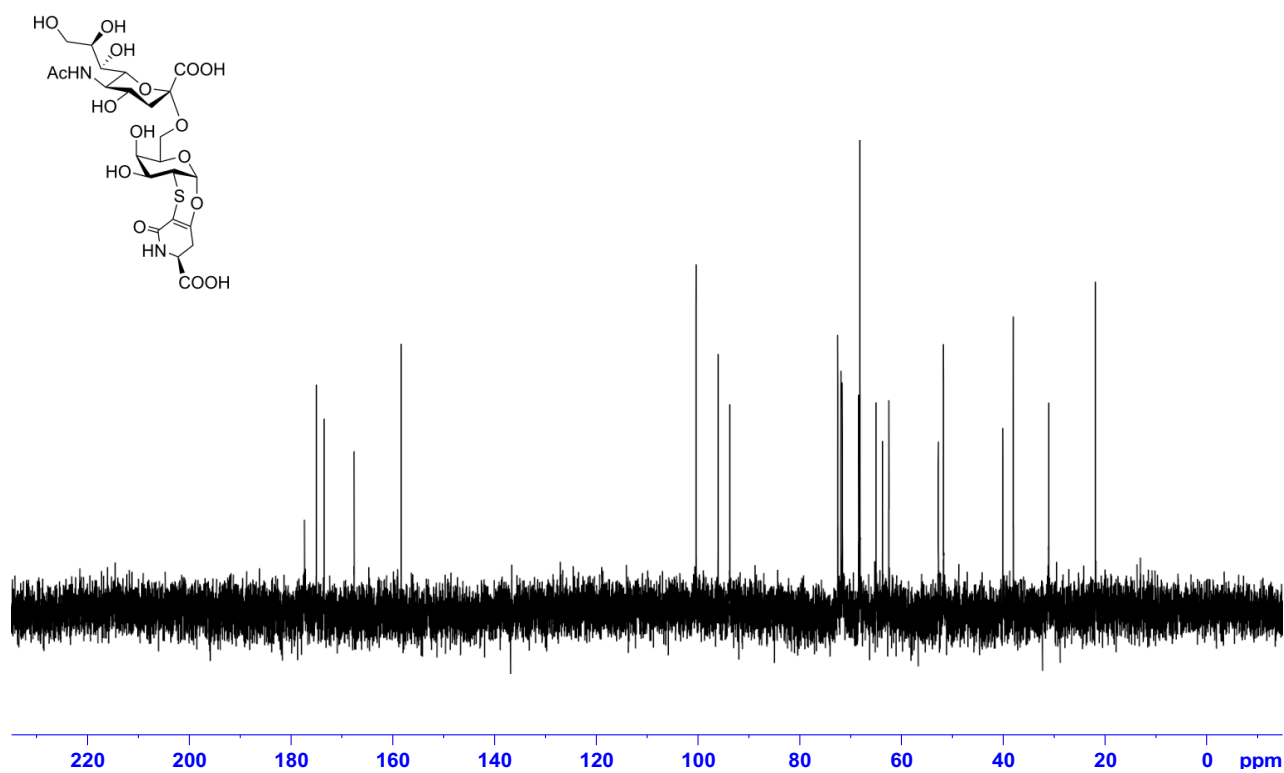

COSY at 500 MHz in D<sub>2</sub>O - 25 deg

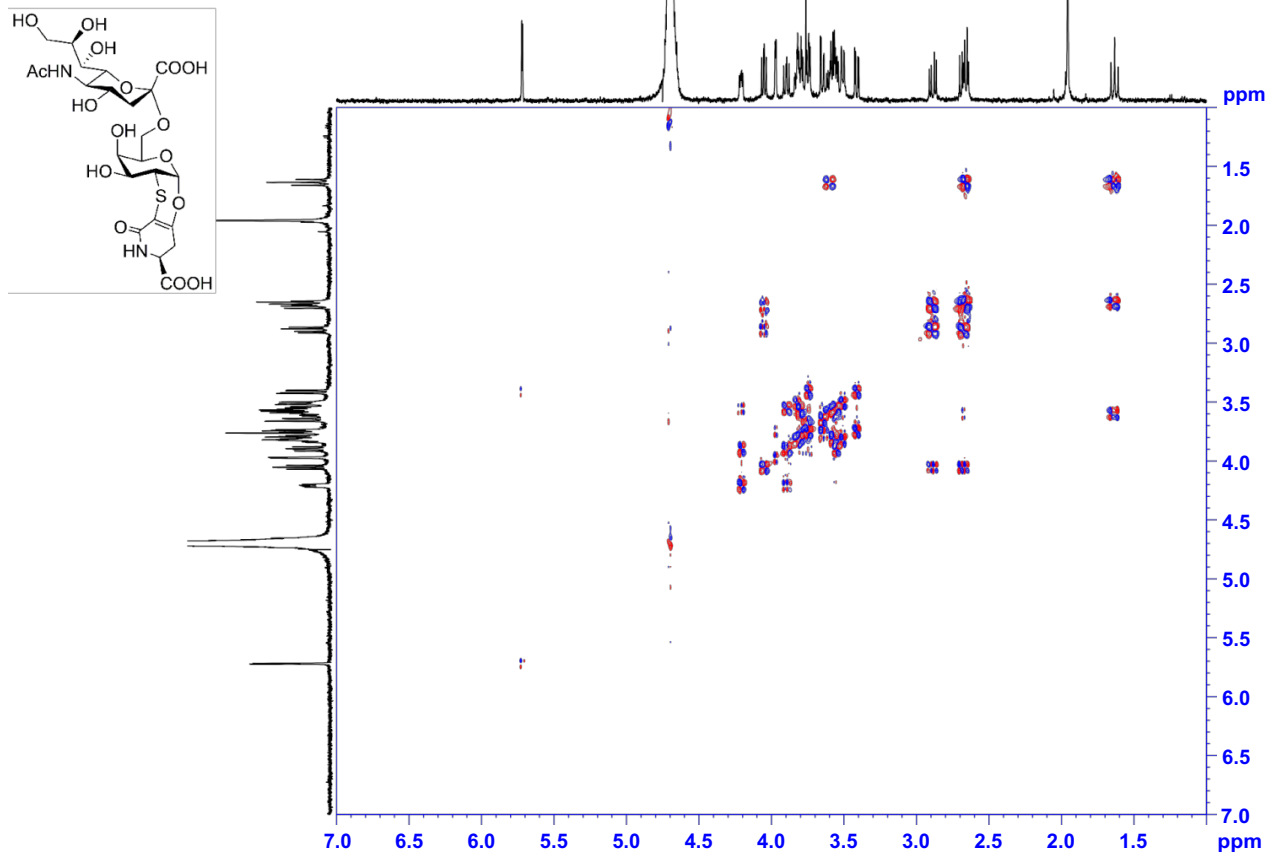

HSQC at 500 MHz in D<sub>2</sub>O - 25 deg

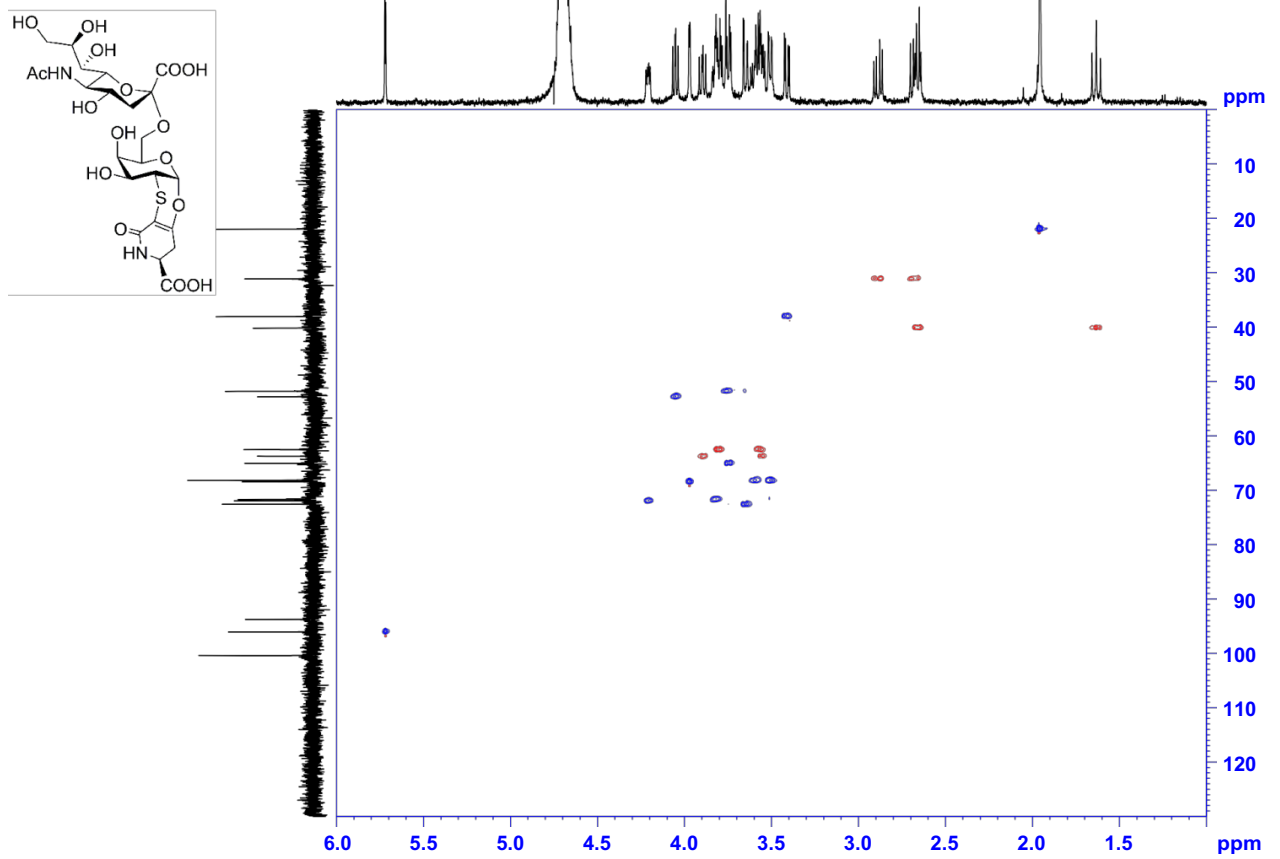

## NMR and ESI-MS spectra of compound 3a

T: ITMS + p ESI Full ms [150.00-2000.00]

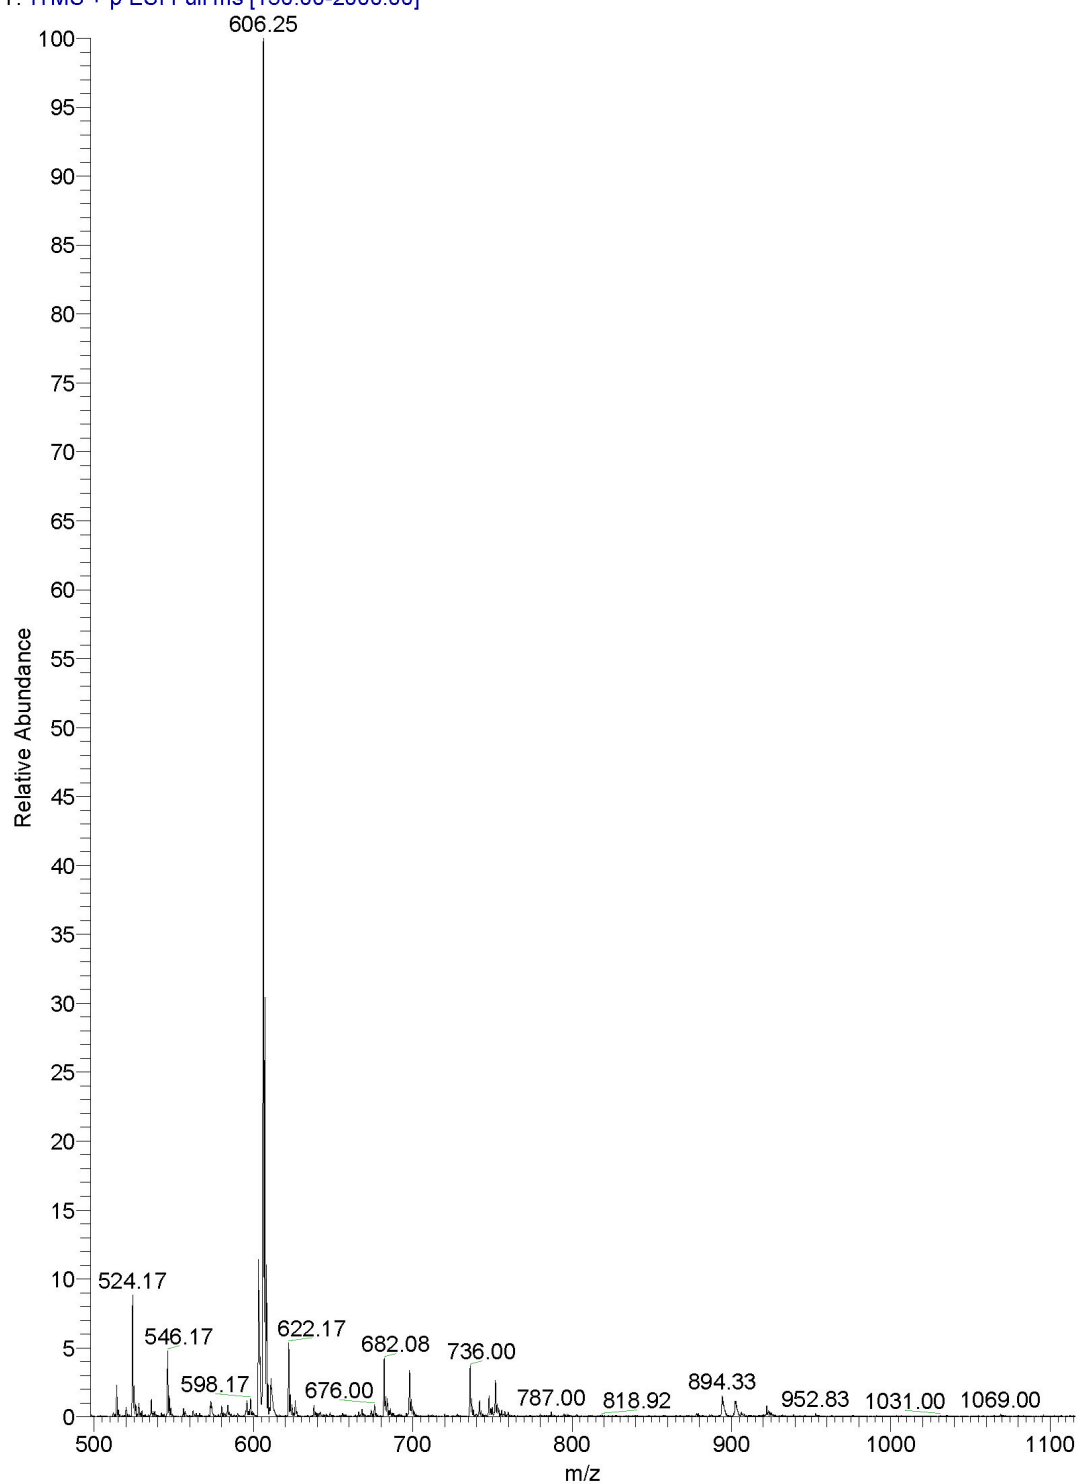

$^1\text{H}$  at 500 MHz in  $\text{CDCl}_3$  - 25 deg

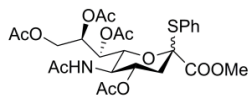

**alpha anomer 13%**  
**beta anomer 87%**

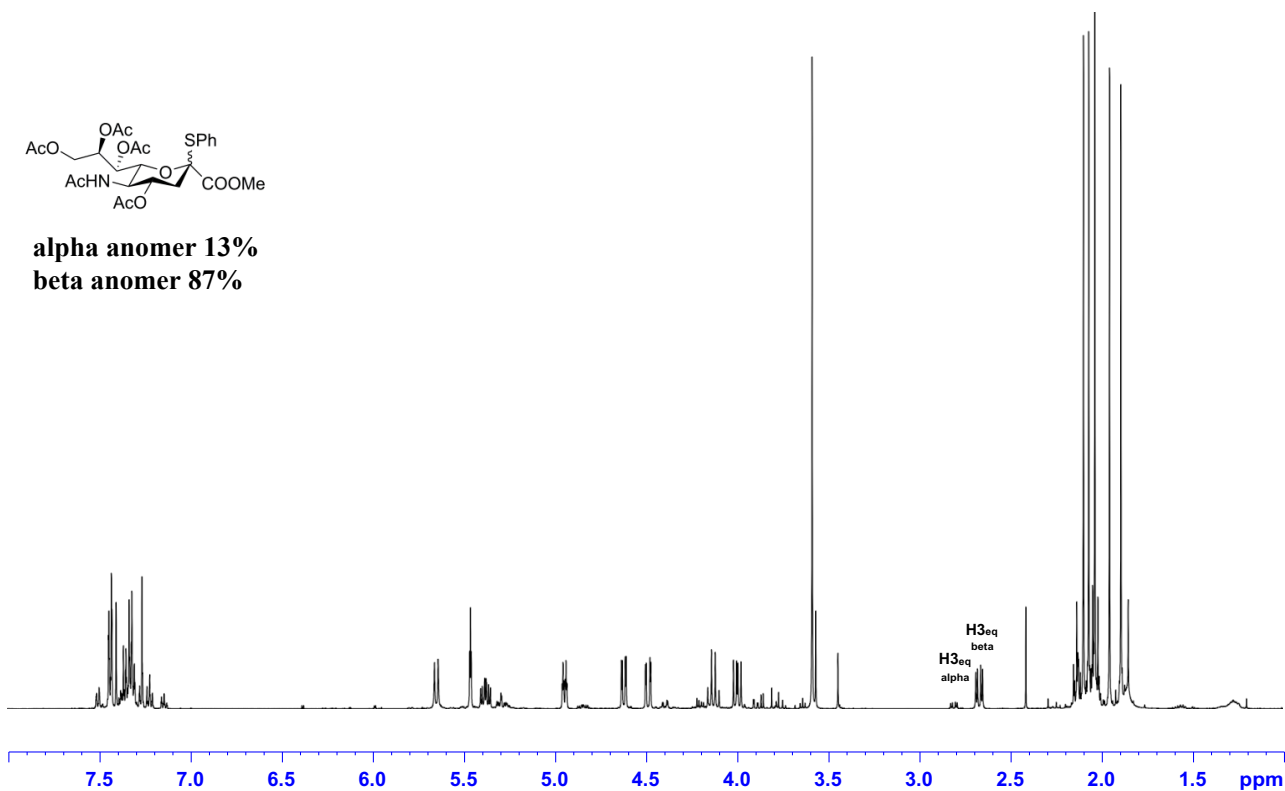

$^{13}\text{C}$  at 125 MHz in  $\text{CDCl}_3$  - 25 deg

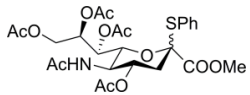

**alpha anomer 13%**  
**beta anomer 87%**

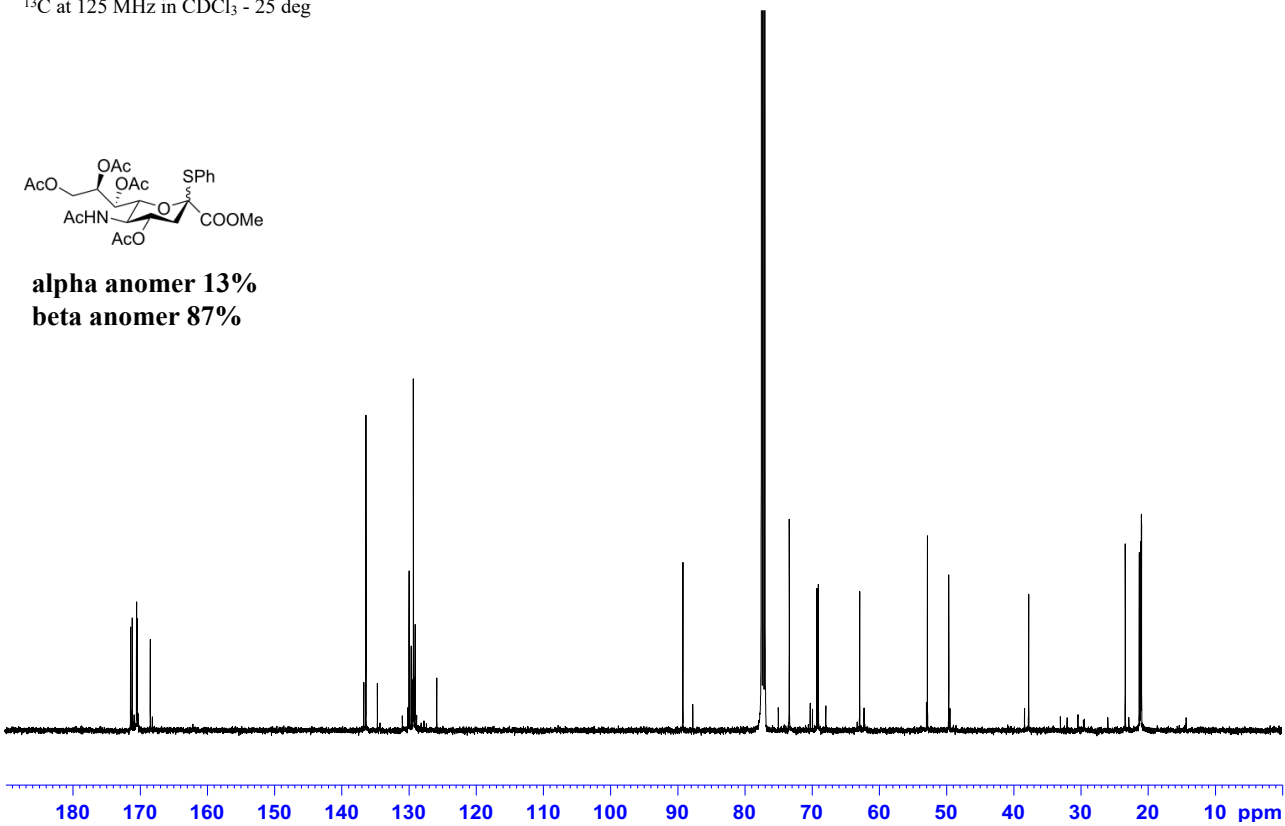

COSY at 500 MHz in CDCl<sub>3</sub> - 25 deg

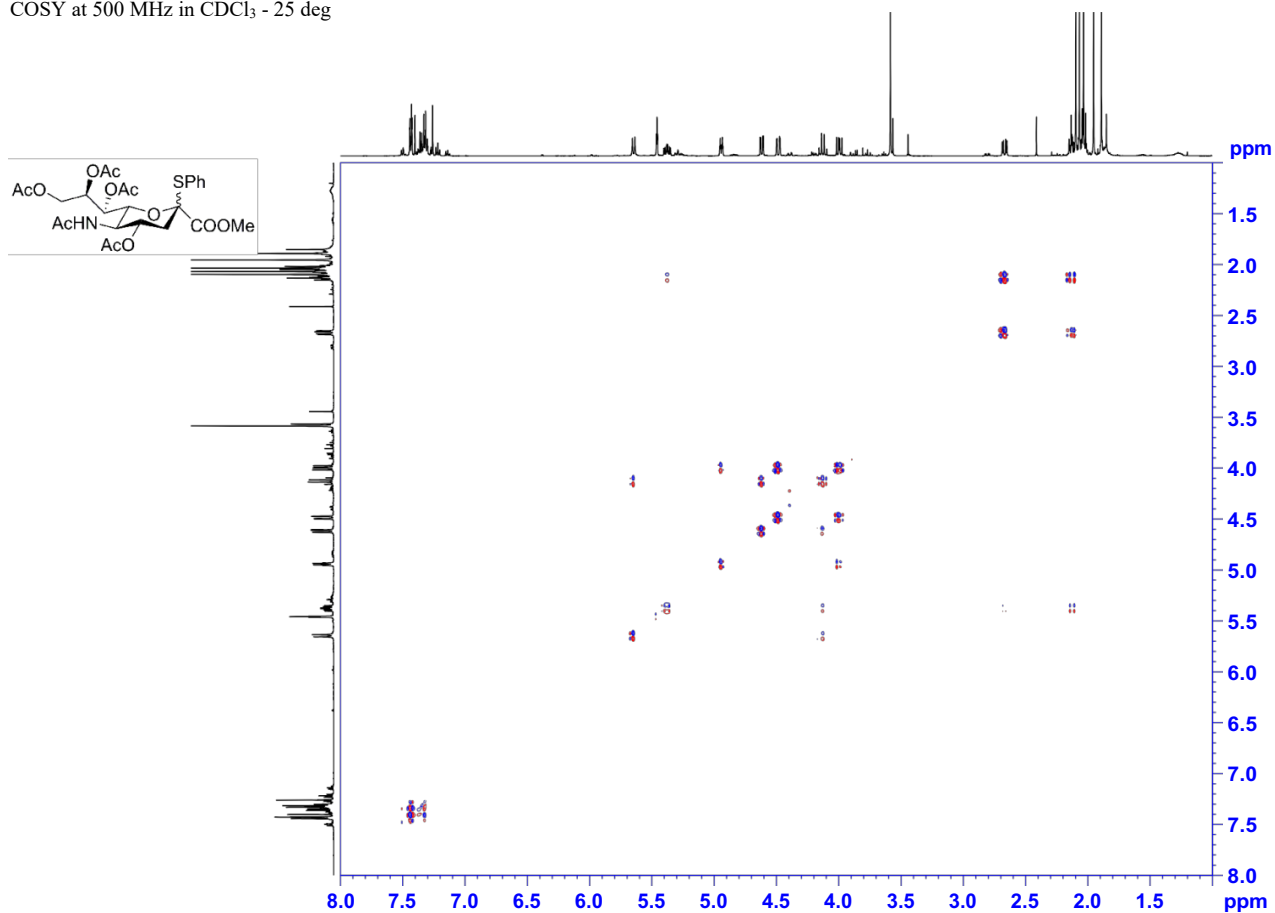

HSQC at 500 MHz in CDCl<sub>3</sub> - 25 deg

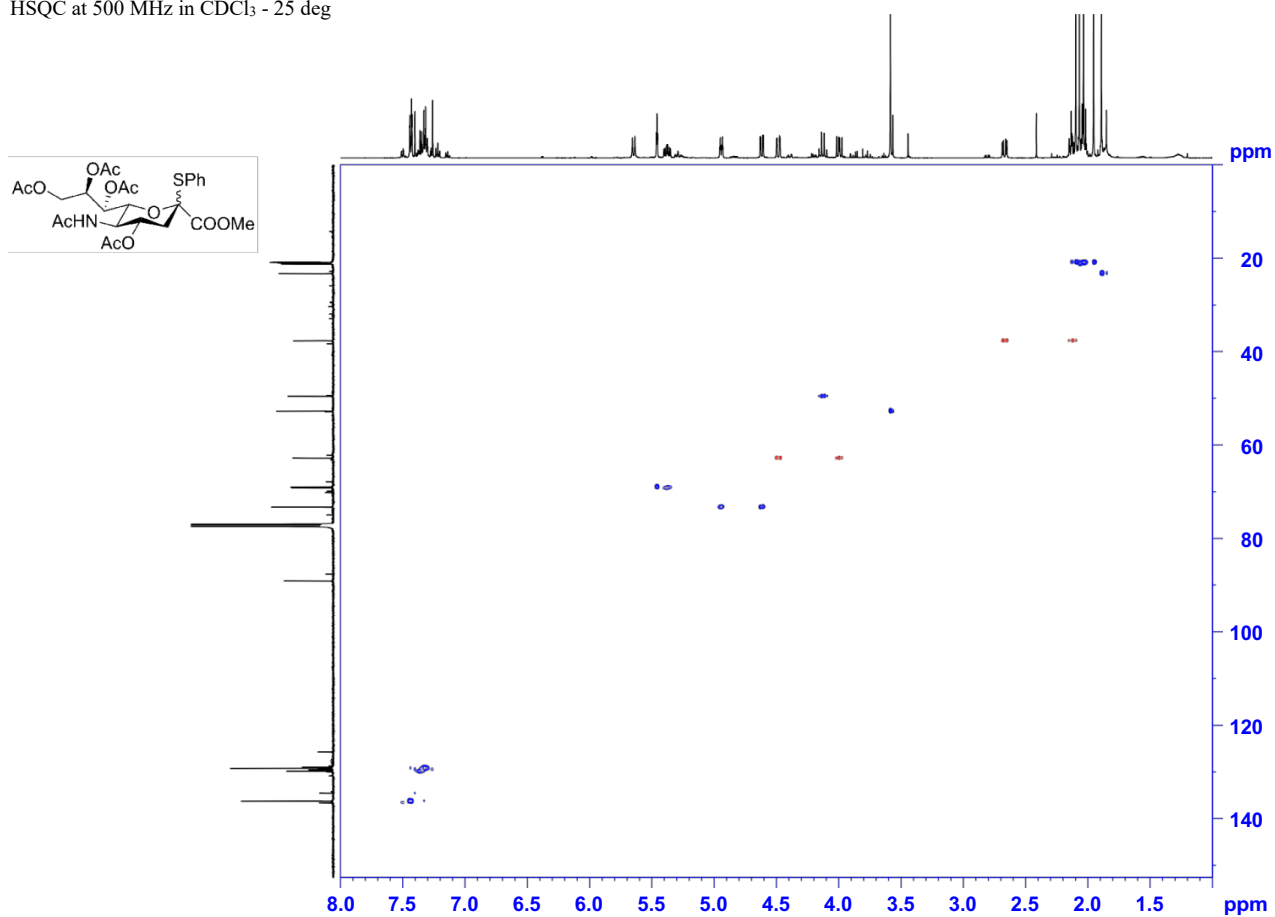

## NMR and ESI-MS spectra of compound 3b

T: ITMS + p ESI Full ms [150.00-2000.00]

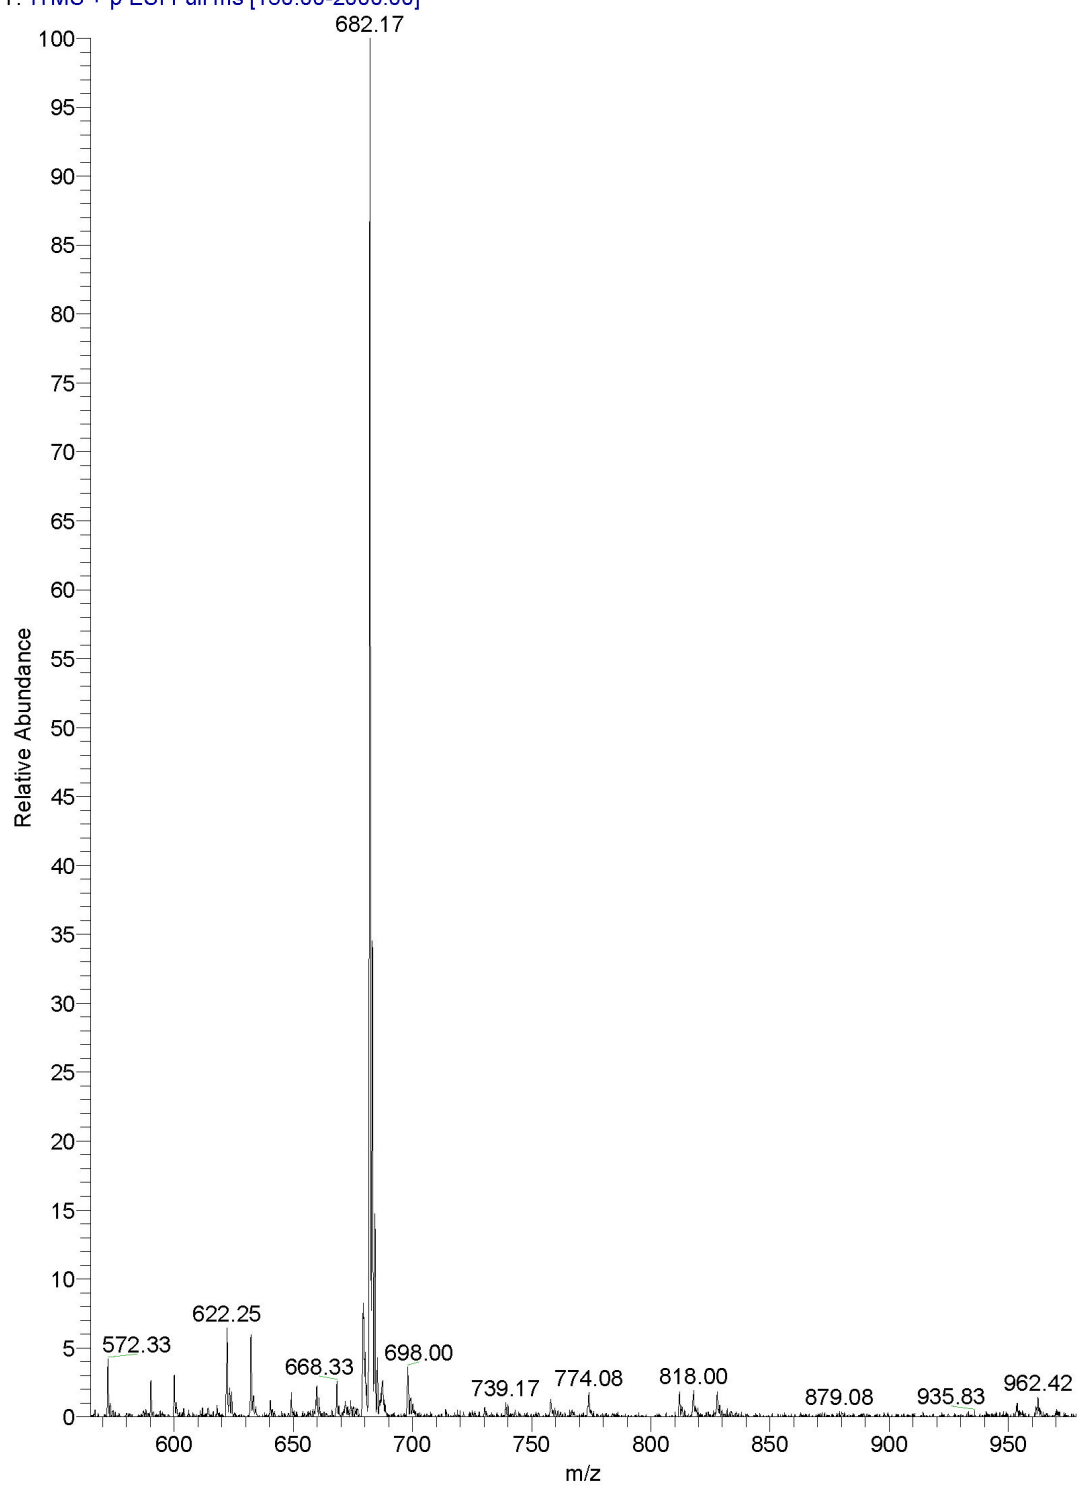

$^1\text{H}$  at 500 MHz in  $\text{CDCl}_3$  - 25 deg

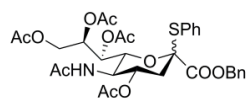

**alpha anomer 14%**  
**beta anomer 86%**

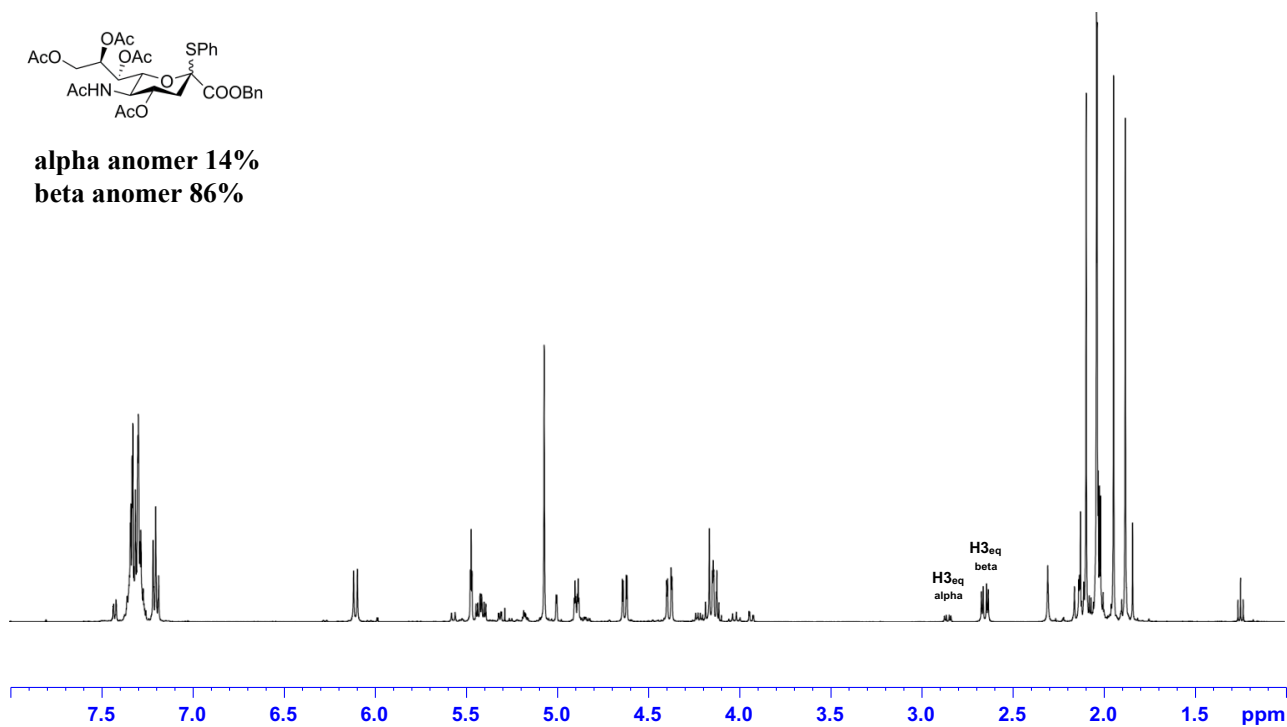

$^{13}\text{C}$  at 125 MHz in  $\text{CDCl}_3$  - 25 deg

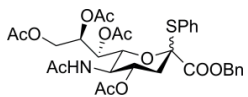

**alpha anomer 14%**  
**beta anomer 86%**

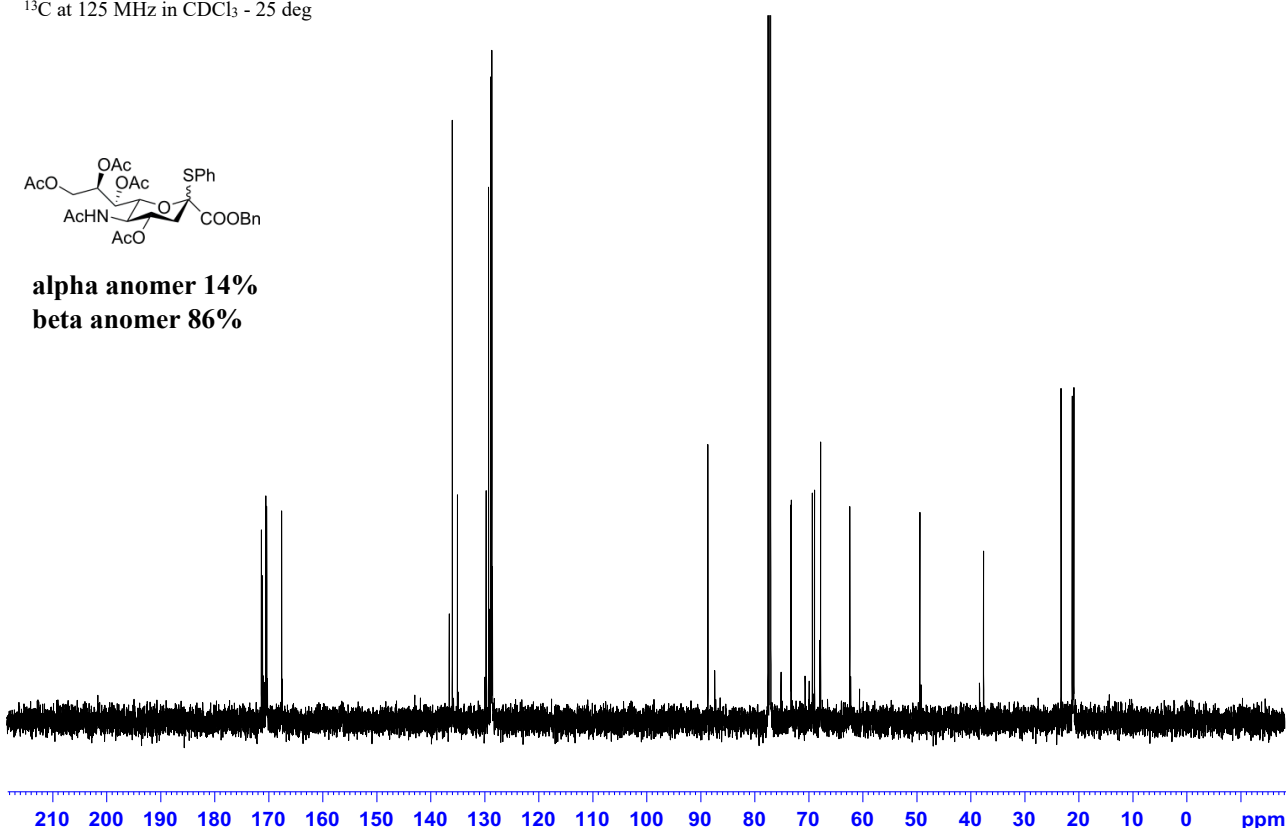

COSY at 500 MHz in CDCl<sub>3</sub> - 25 deg

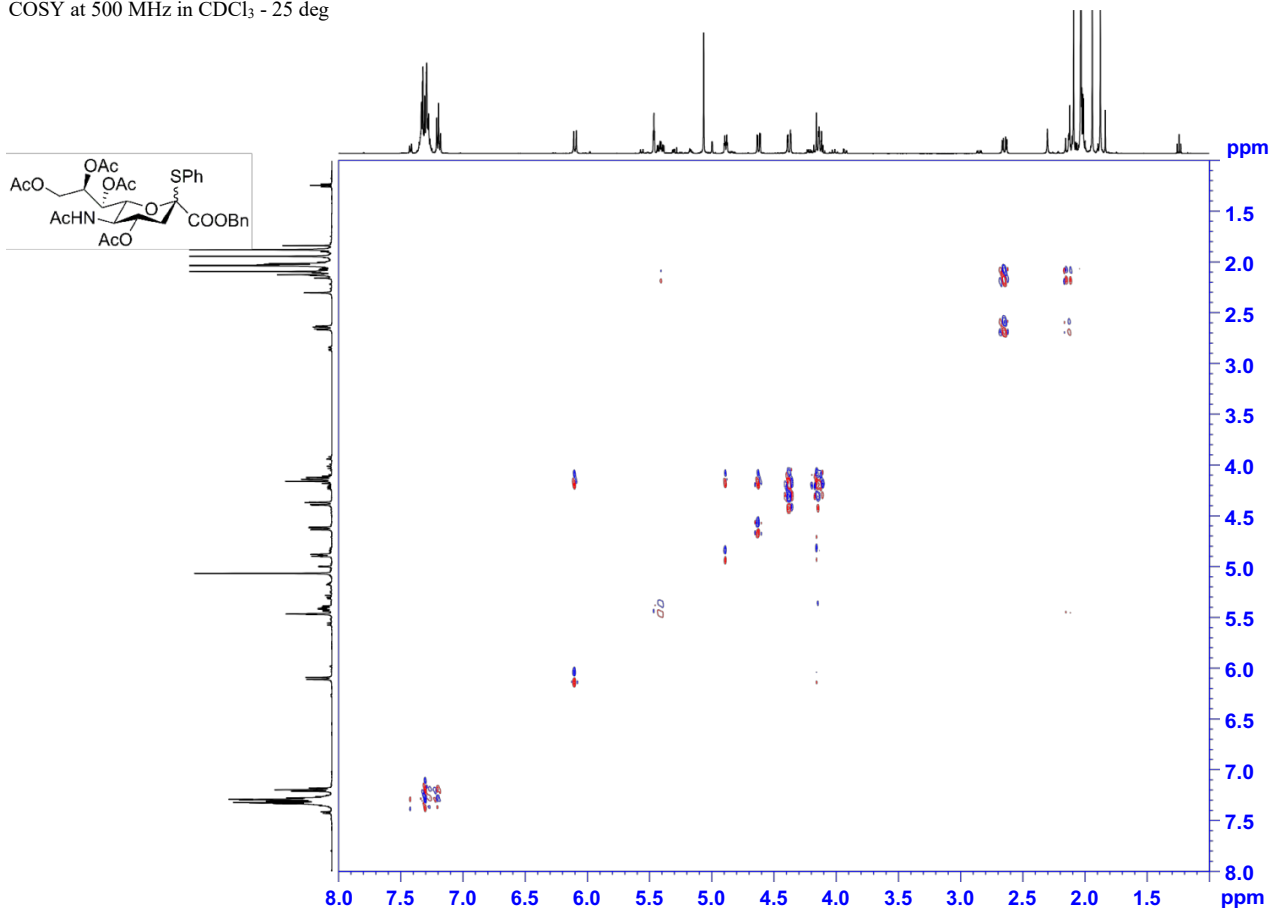

HSQC at 500 MHz in CDCl<sub>3</sub> - 25 deg

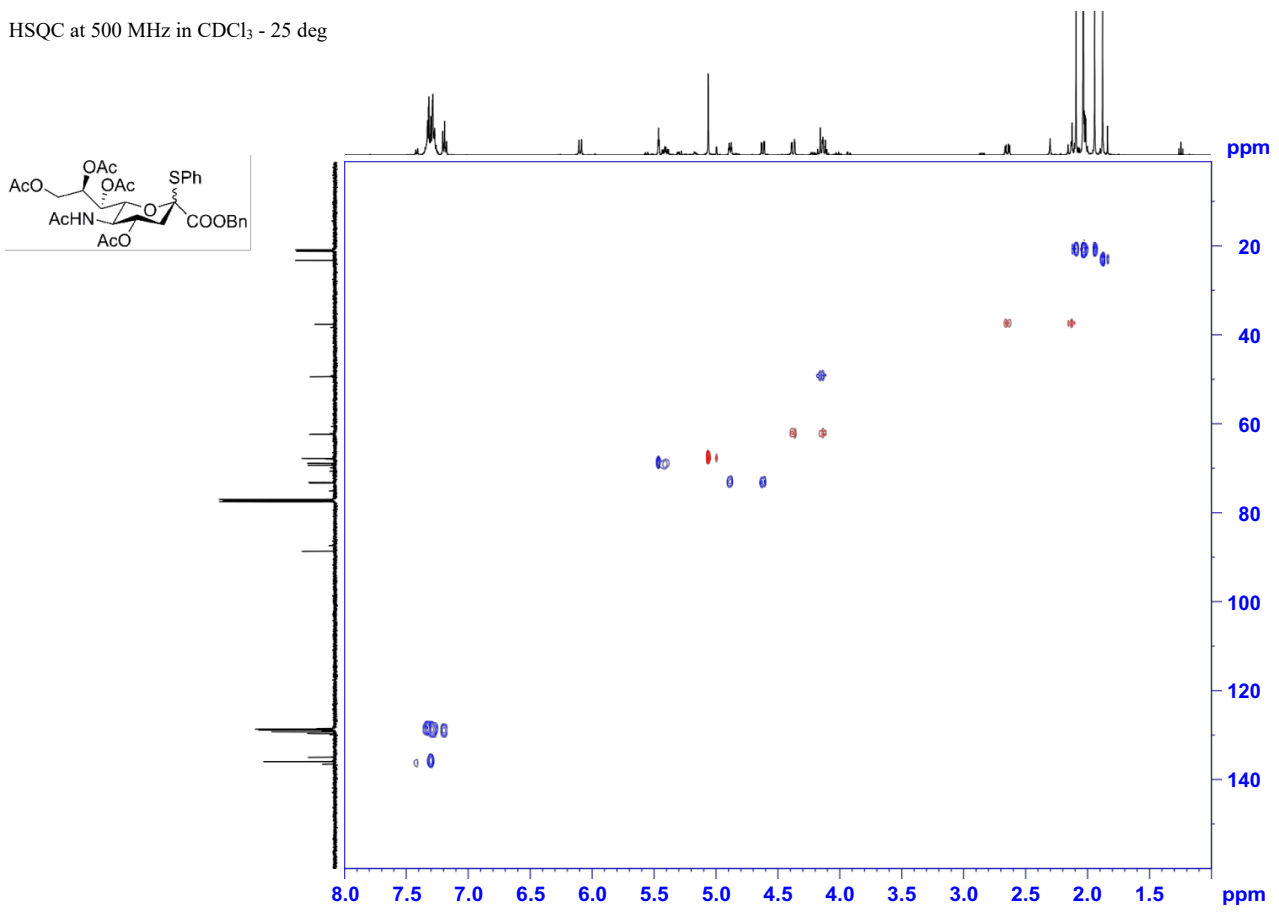



## NMR and ESI-MS spectra of compound 4

T: ITMS + p ESI Full ms [150.00-2000.00]

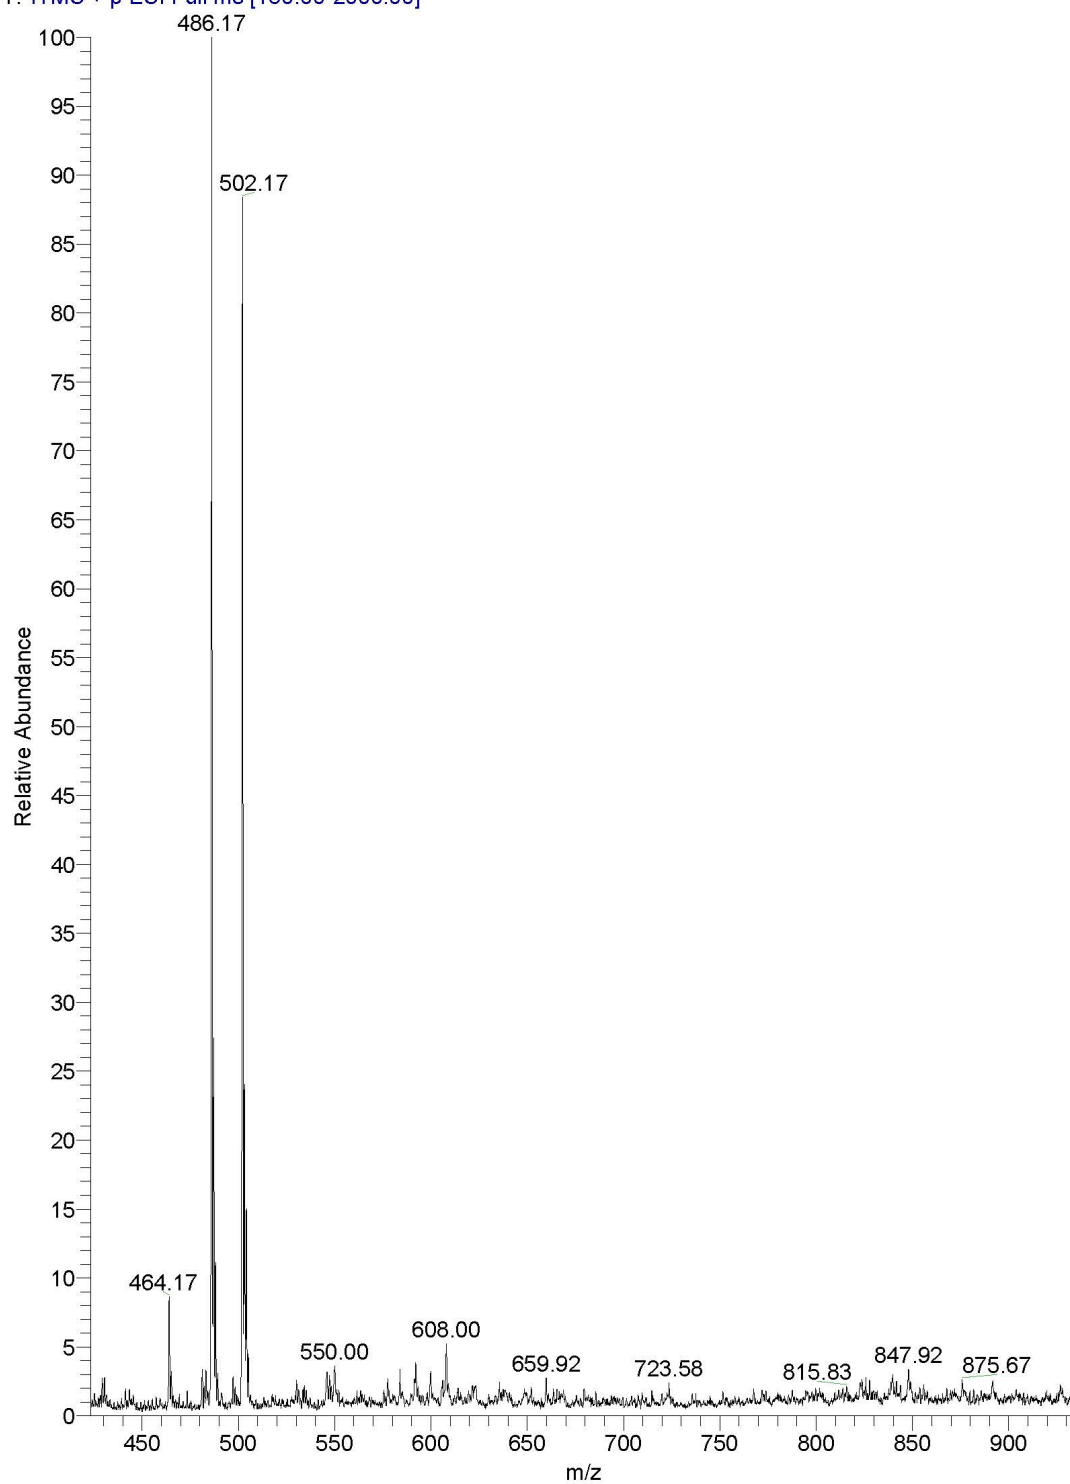

$^1\text{H}$  at 500 MHz in  $\text{DMSO}_d_6$  - 25 deg

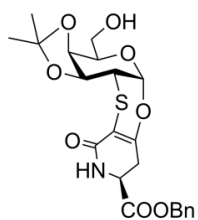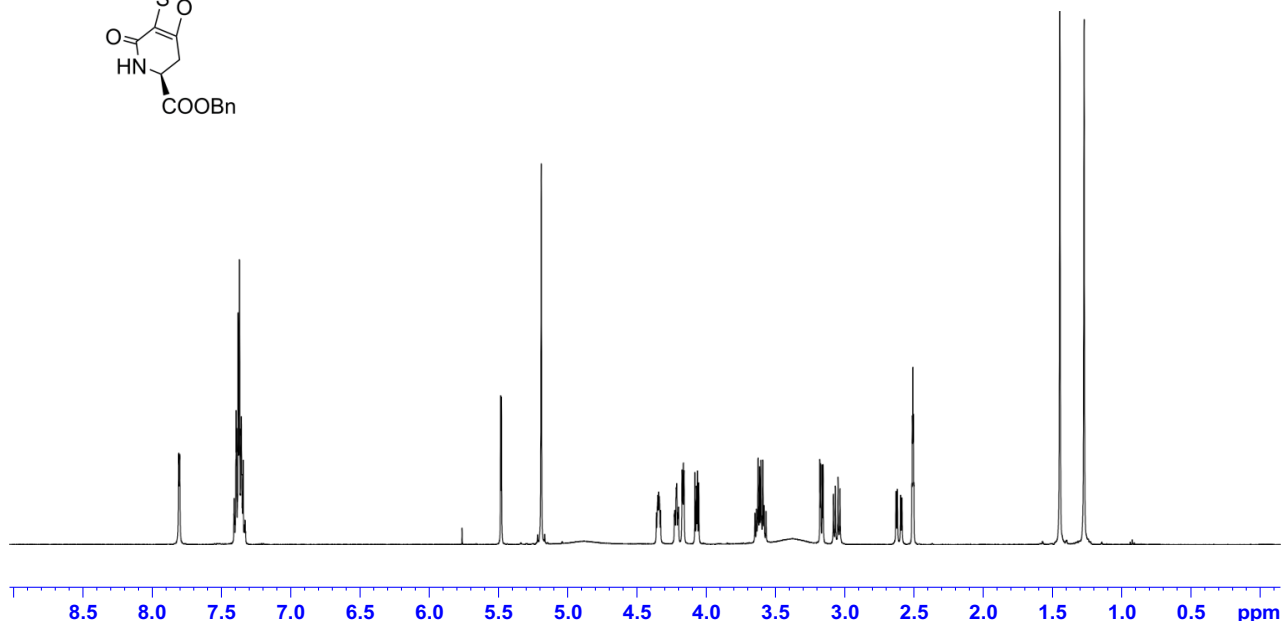

$^{13}\text{C}$  at 125 MHz in  $\text{DMSO}_d_6$  - 25 deg

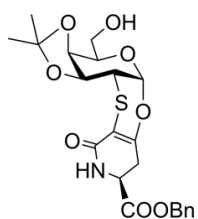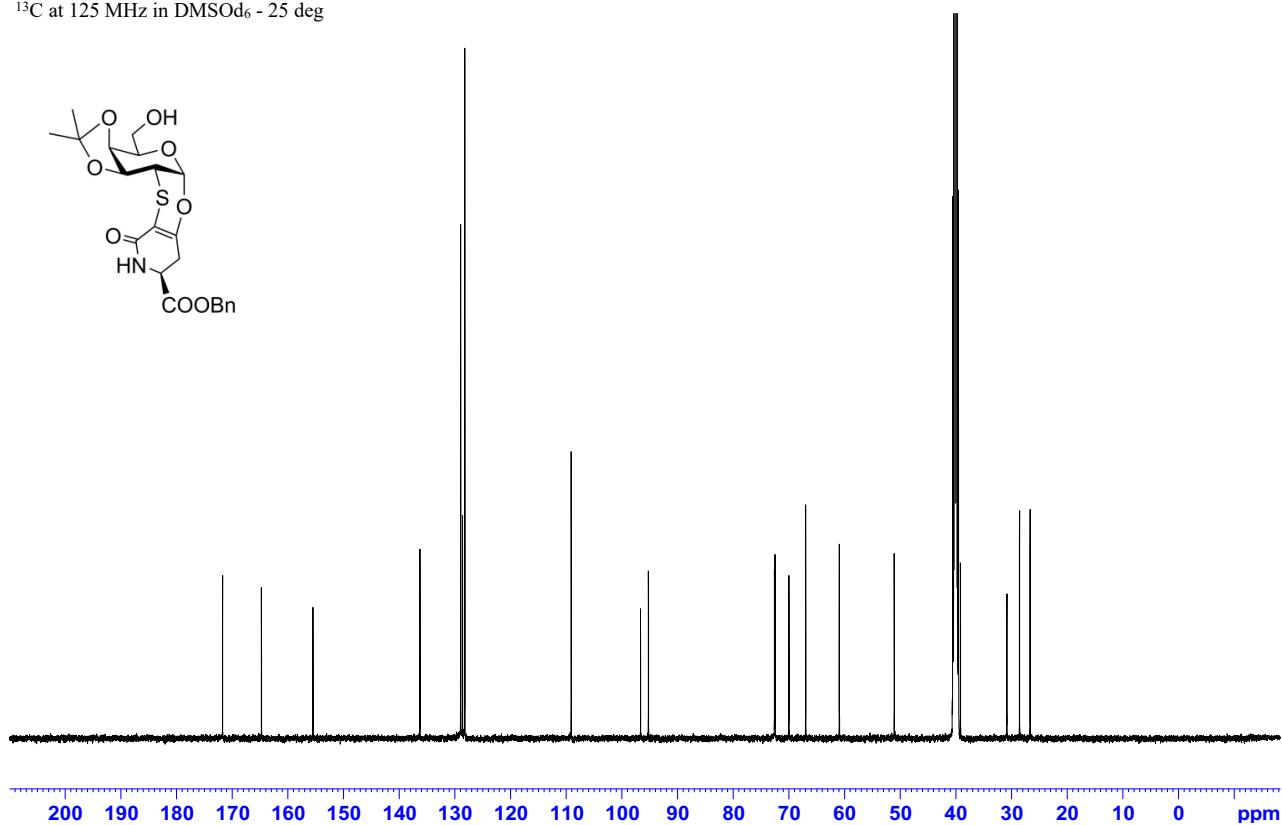

COSY at 500 MHz in DMSO<sub>6</sub> - 25 deg

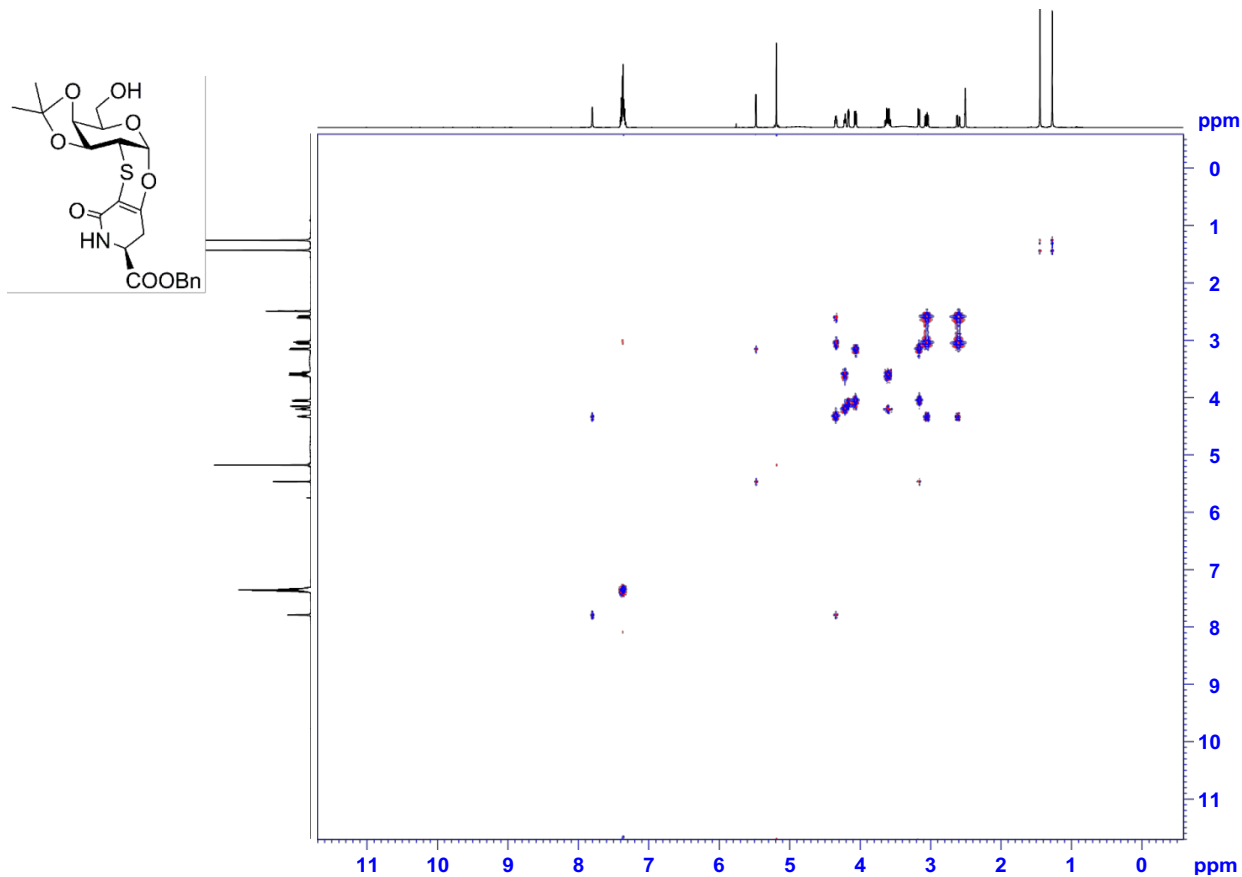

HSQC at 500 MHz in DMSO<sub>6</sub> - 25 deg

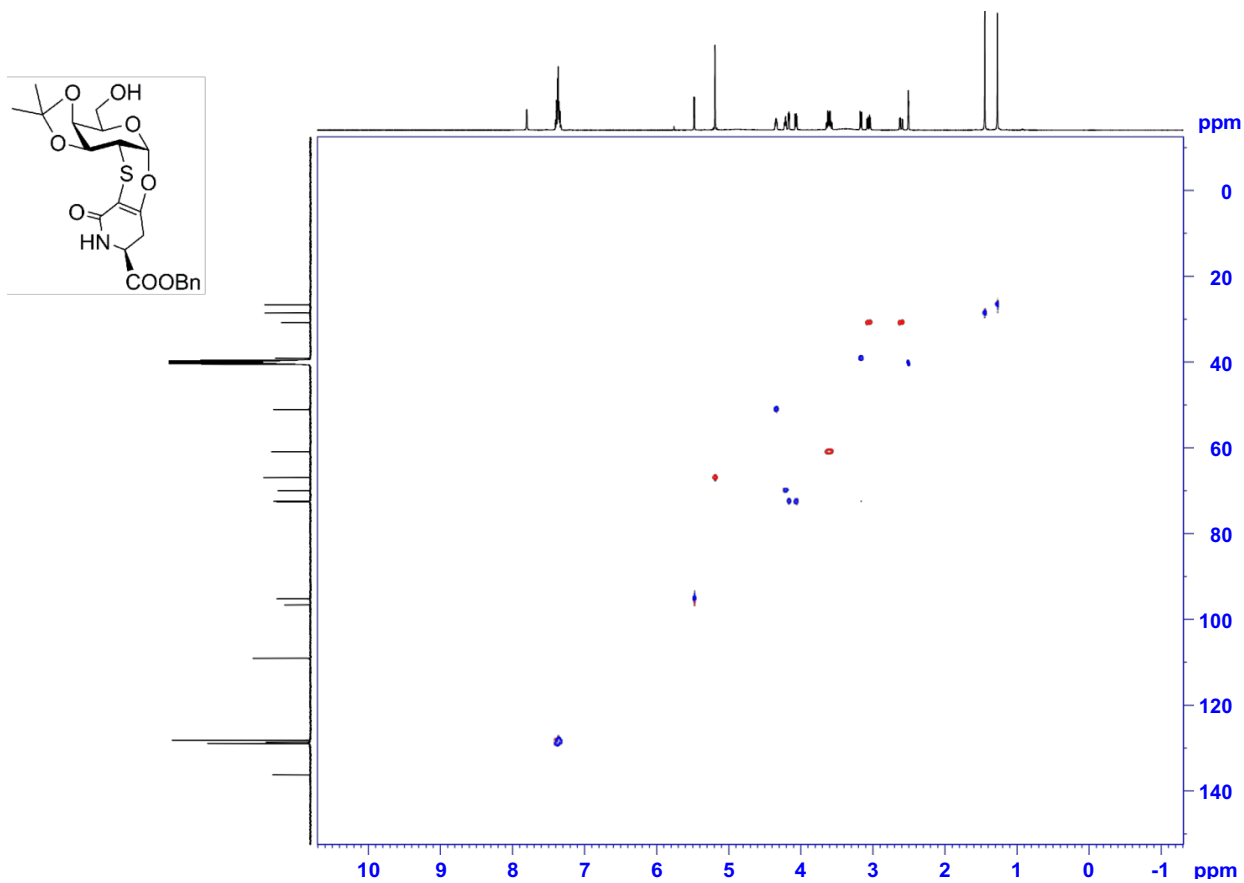

## NMR and ESI-MS spectra of compound 6a

T: ITMS + p ESI Full ms [150.00-2000.00]

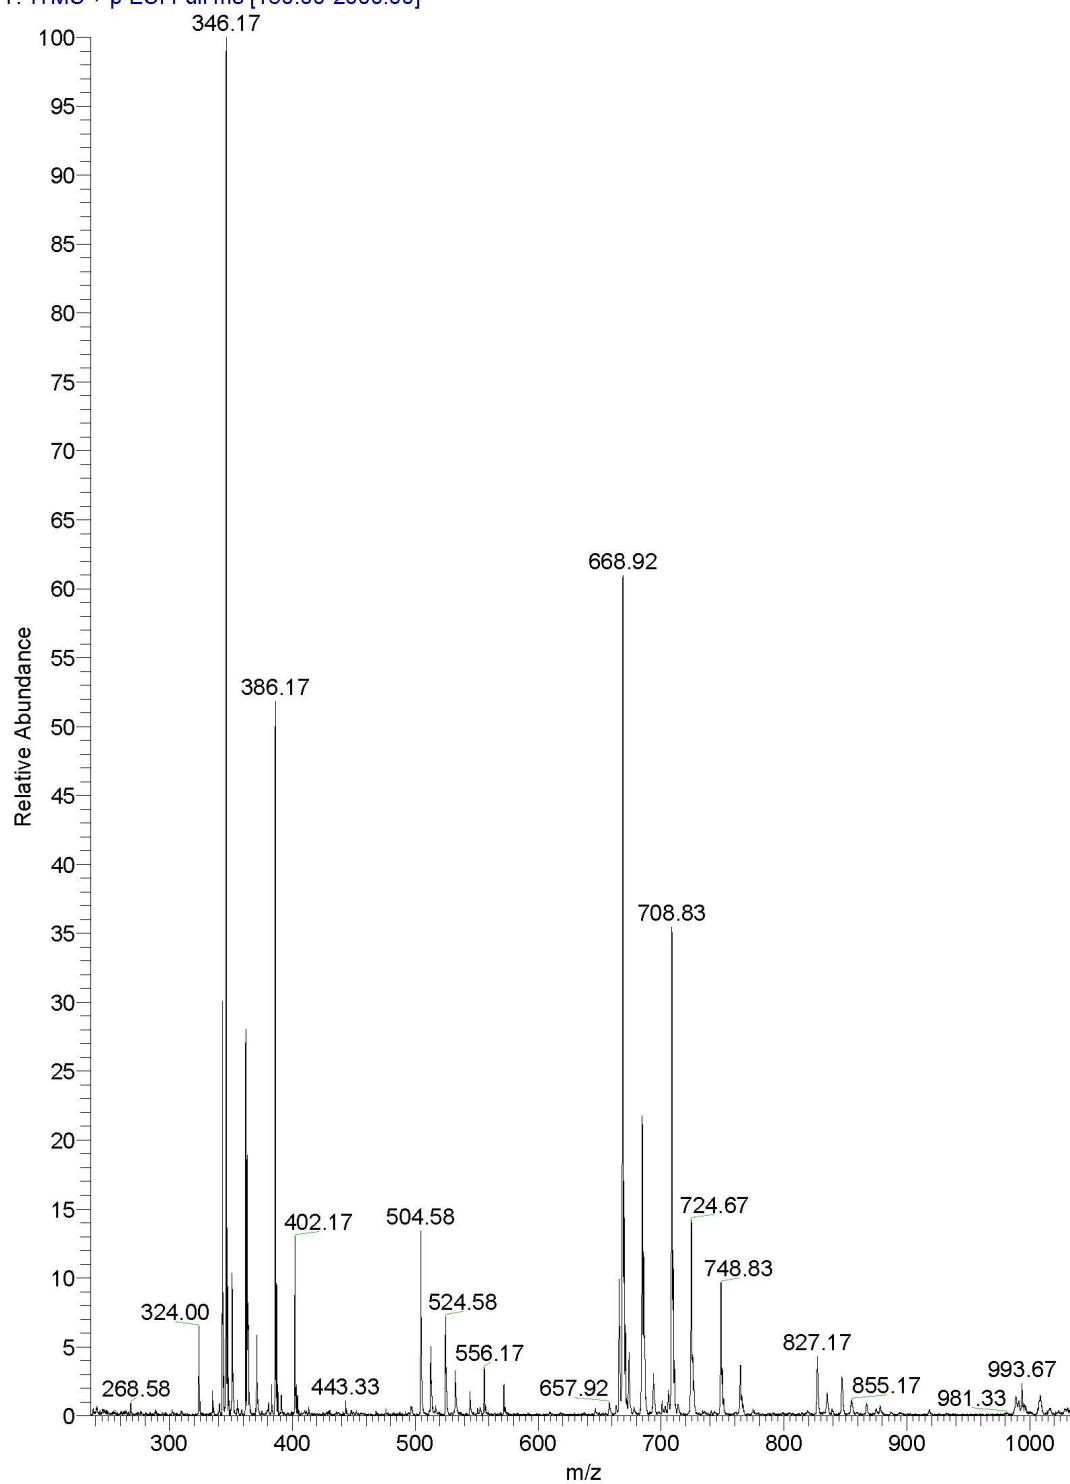

$^1\text{H}$  at 500 MHz in  $\text{CD}_3\text{OD}$  - 25 deg

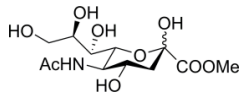

**alpha anomer 7%**  
**beta anomer 93%**

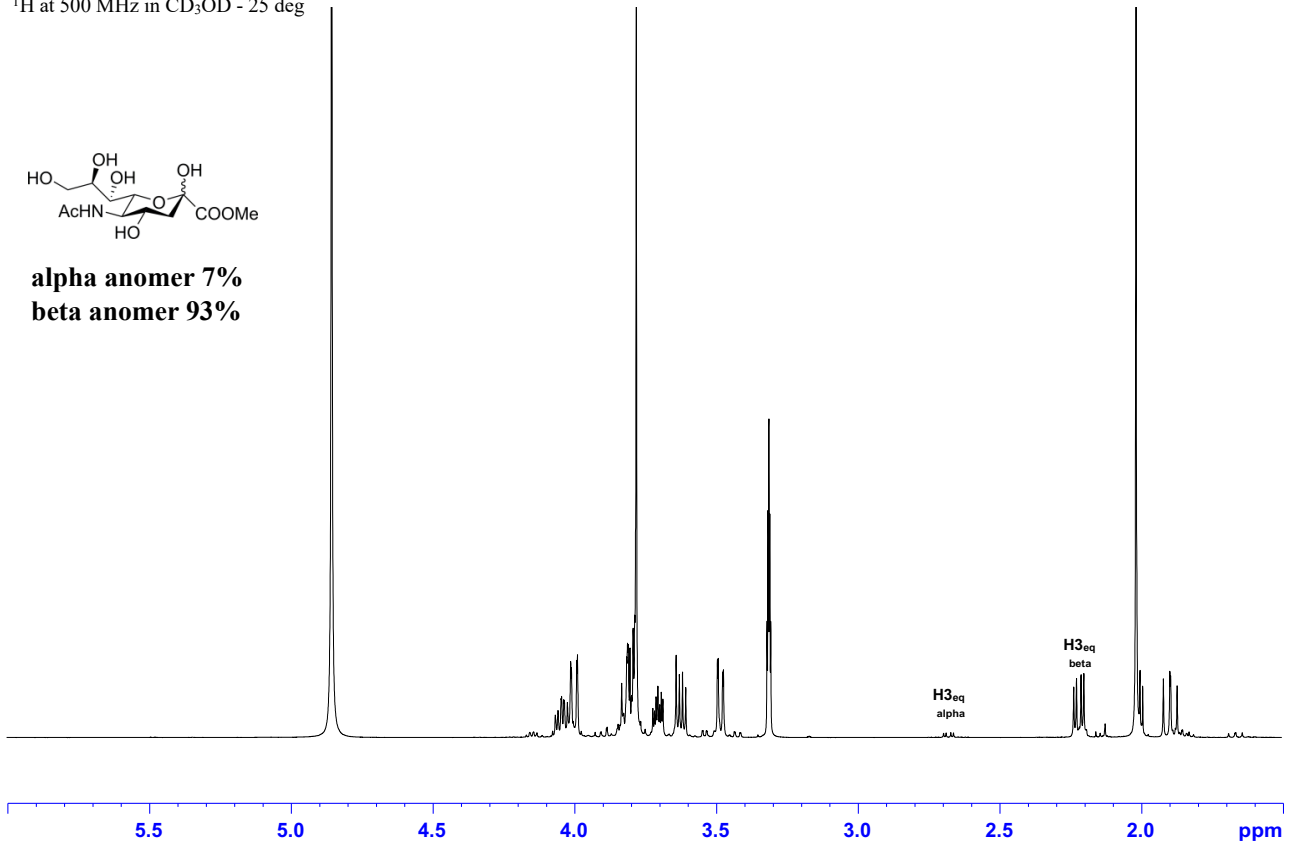

$^{13}\text{C}$  at 125 MHz in  $\text{CD}_3\text{OD}$  - 25 deg

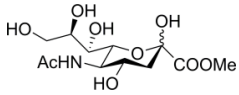

**alpha anomer 7%**  
**beta anomer 93%**

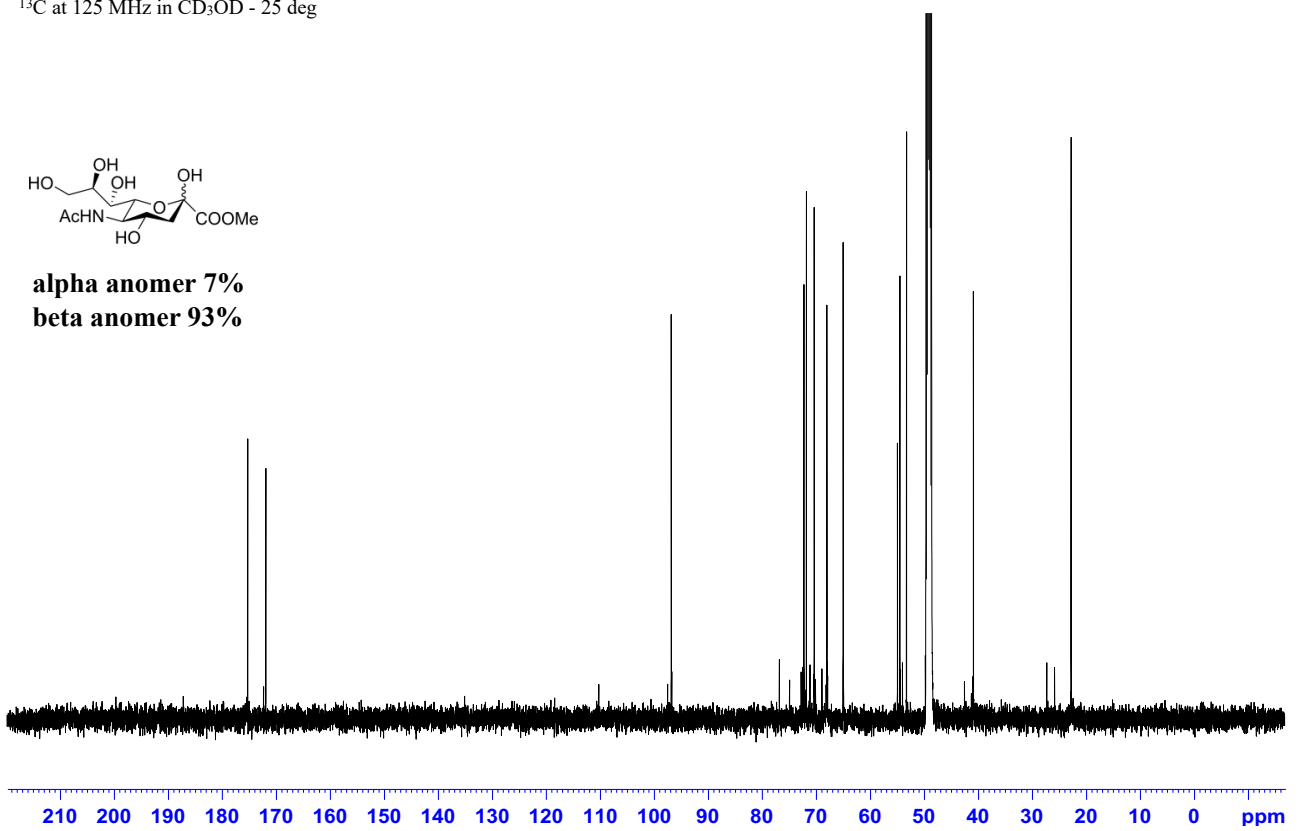

COSY at 500 MHz in CD<sub>3</sub>OD - 25 deg

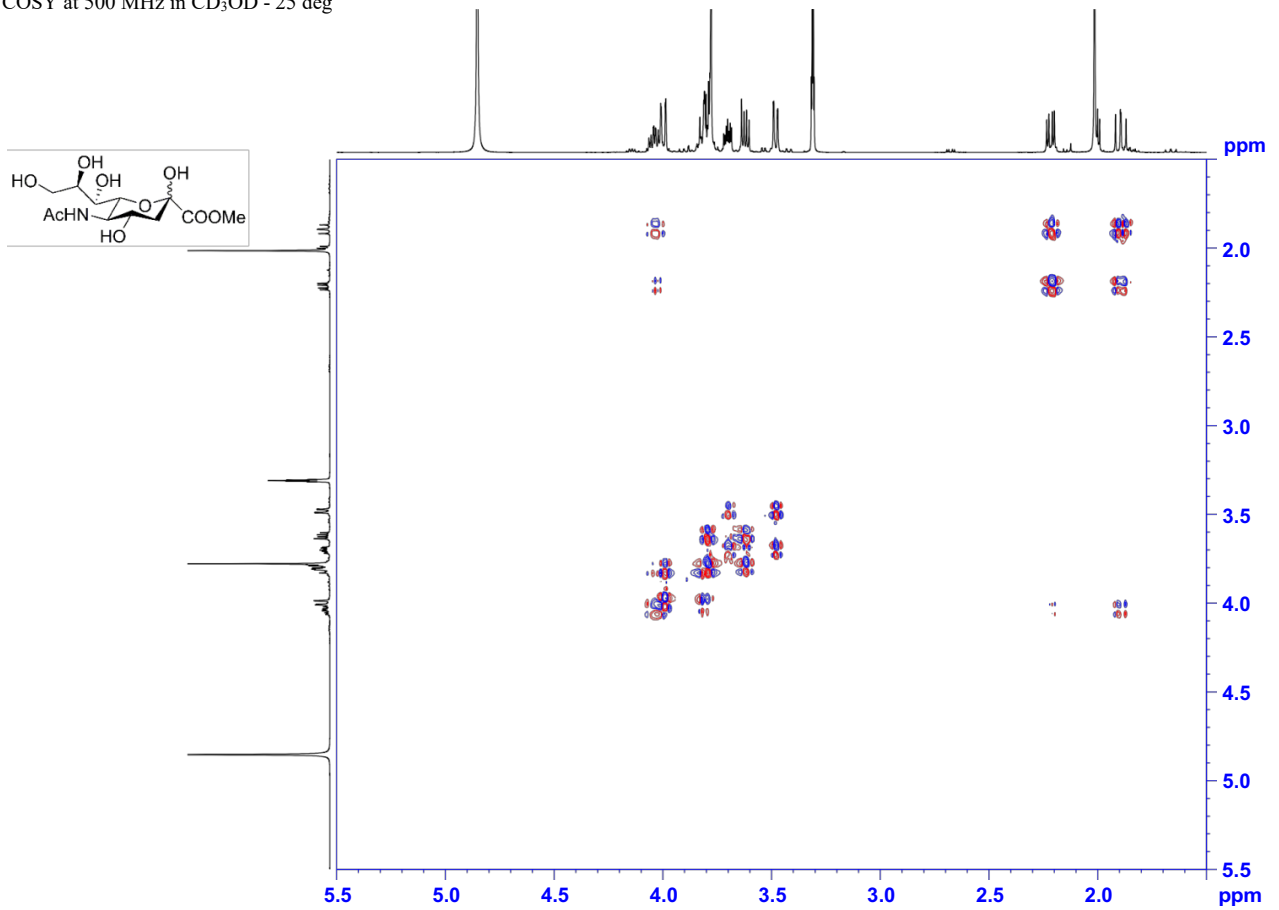

HSQC at 500 MHz in CD<sub>3</sub>OD - 25 deg

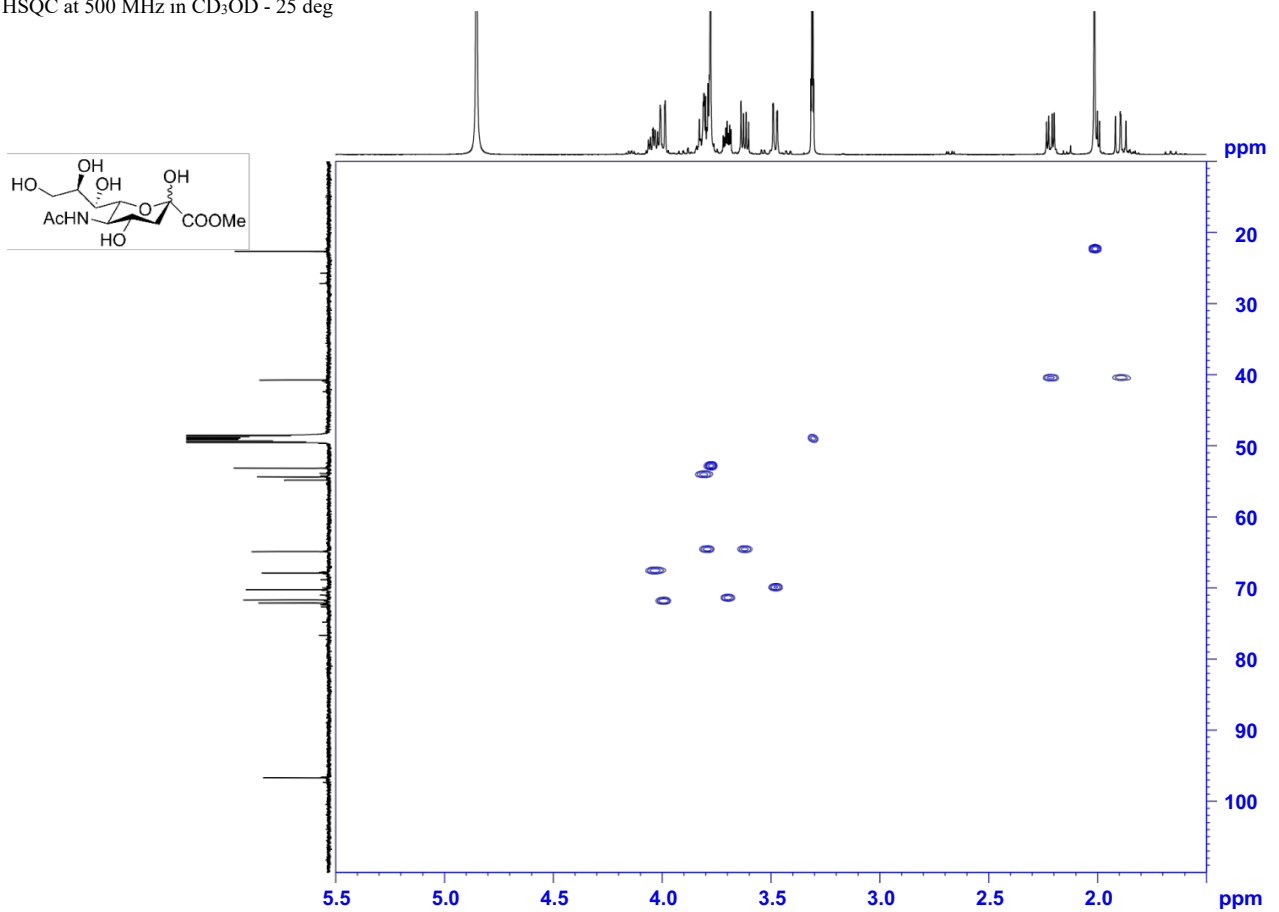

## NMR and ESI-MS spectra of compound 7a

T: ITMS + p ESI Full ms [150.00-2000.00]

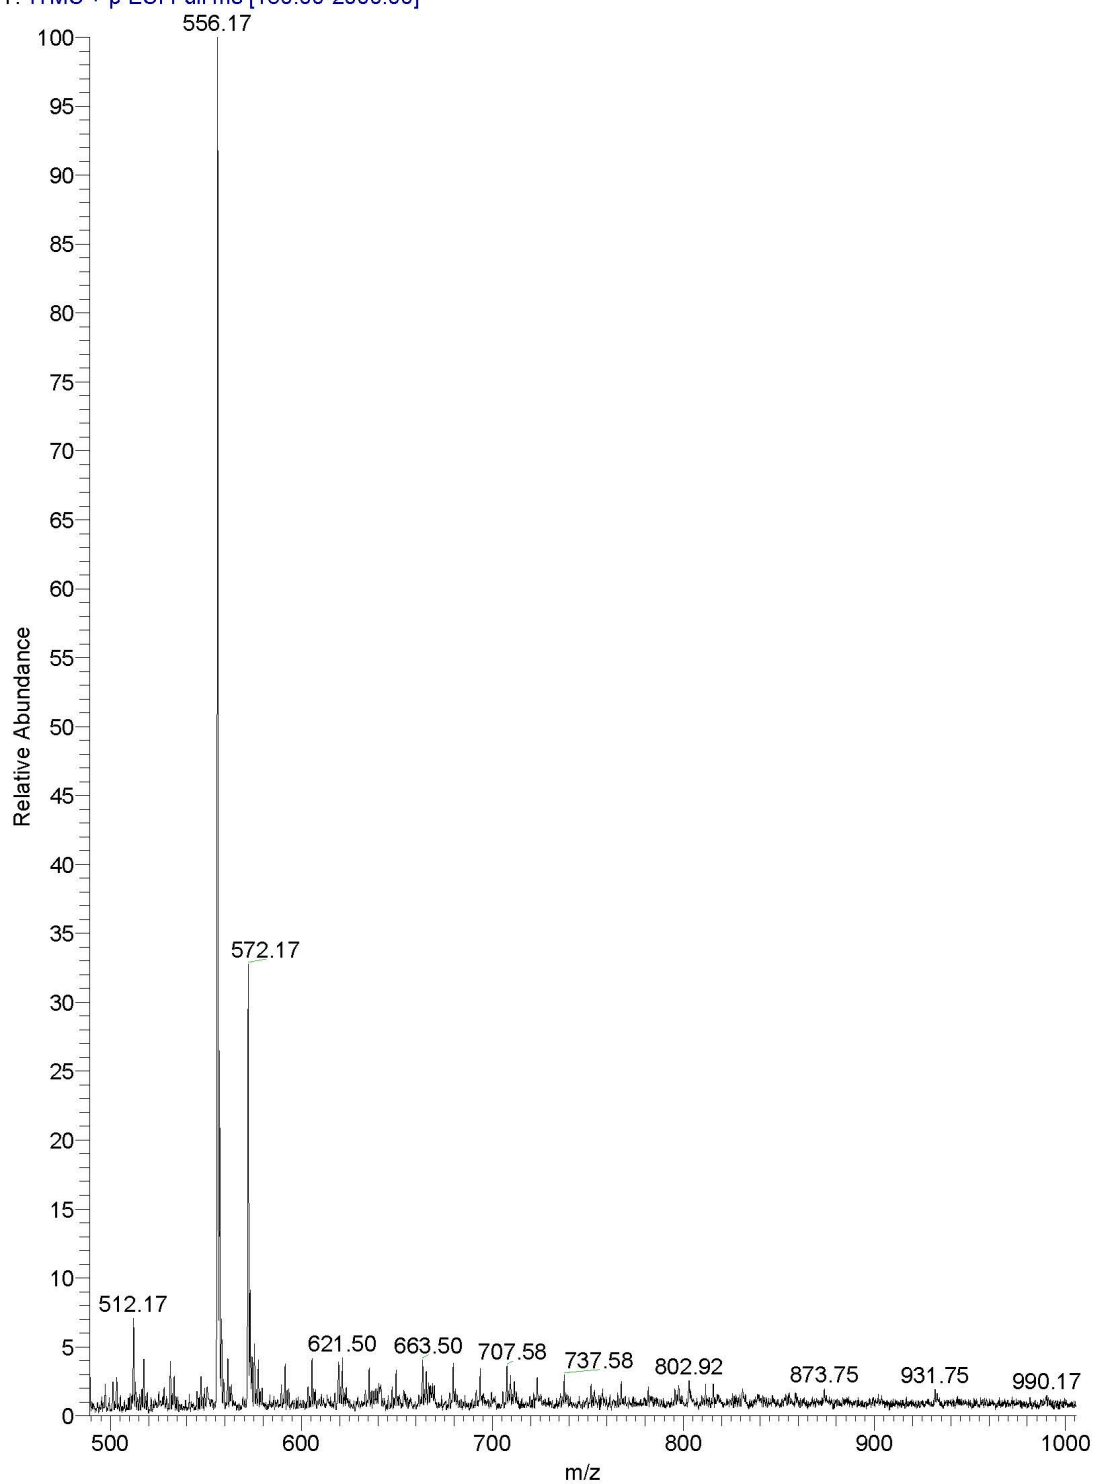

$^1\text{H}$  at 500 MHz in  $\text{CDCl}_3$  - 25 deg

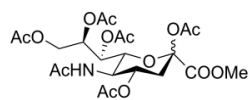

**beta anomer > 90%**

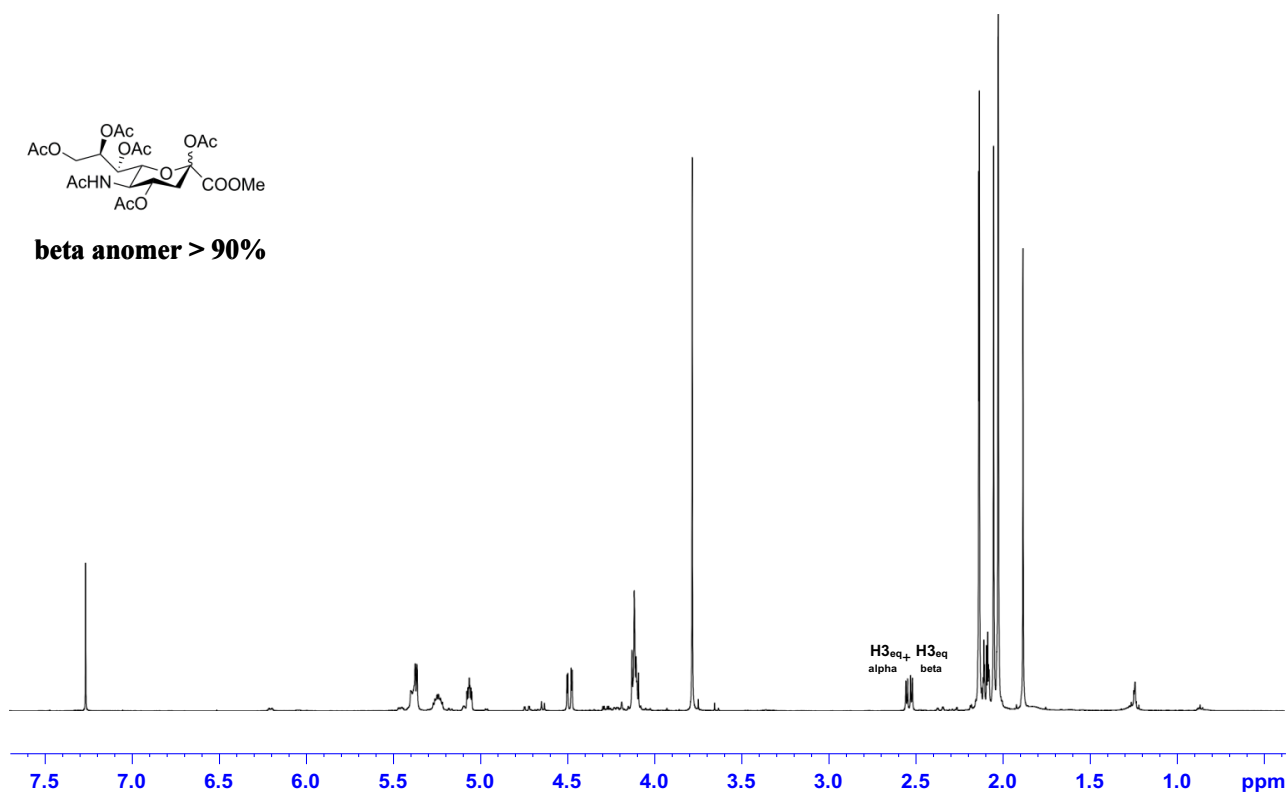

$^{13}\text{C}$  at 125 MHz in  $\text{CDCl}_3$  - 25 deg

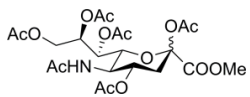

**beta anomer > 90%**

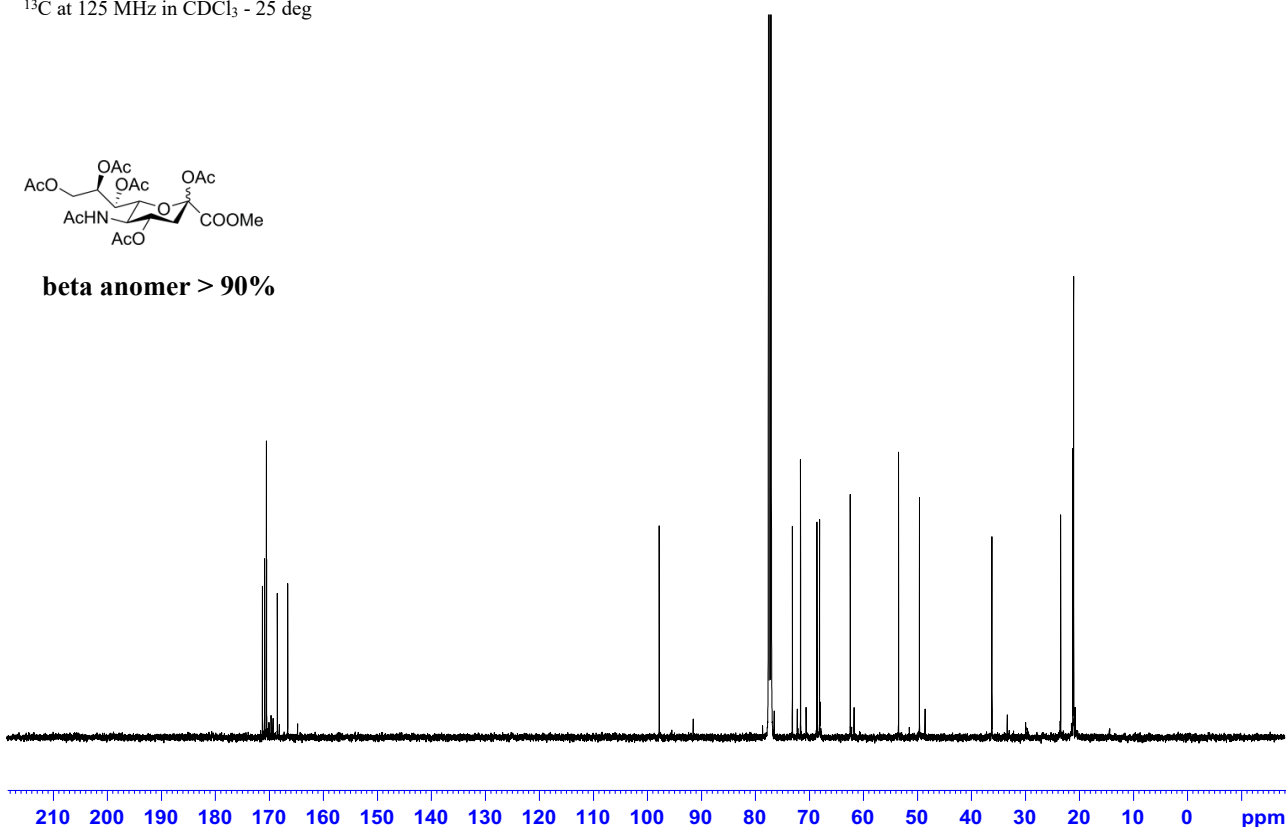



COSY at 500 MHz in CDCl<sub>3</sub> - 25 deg

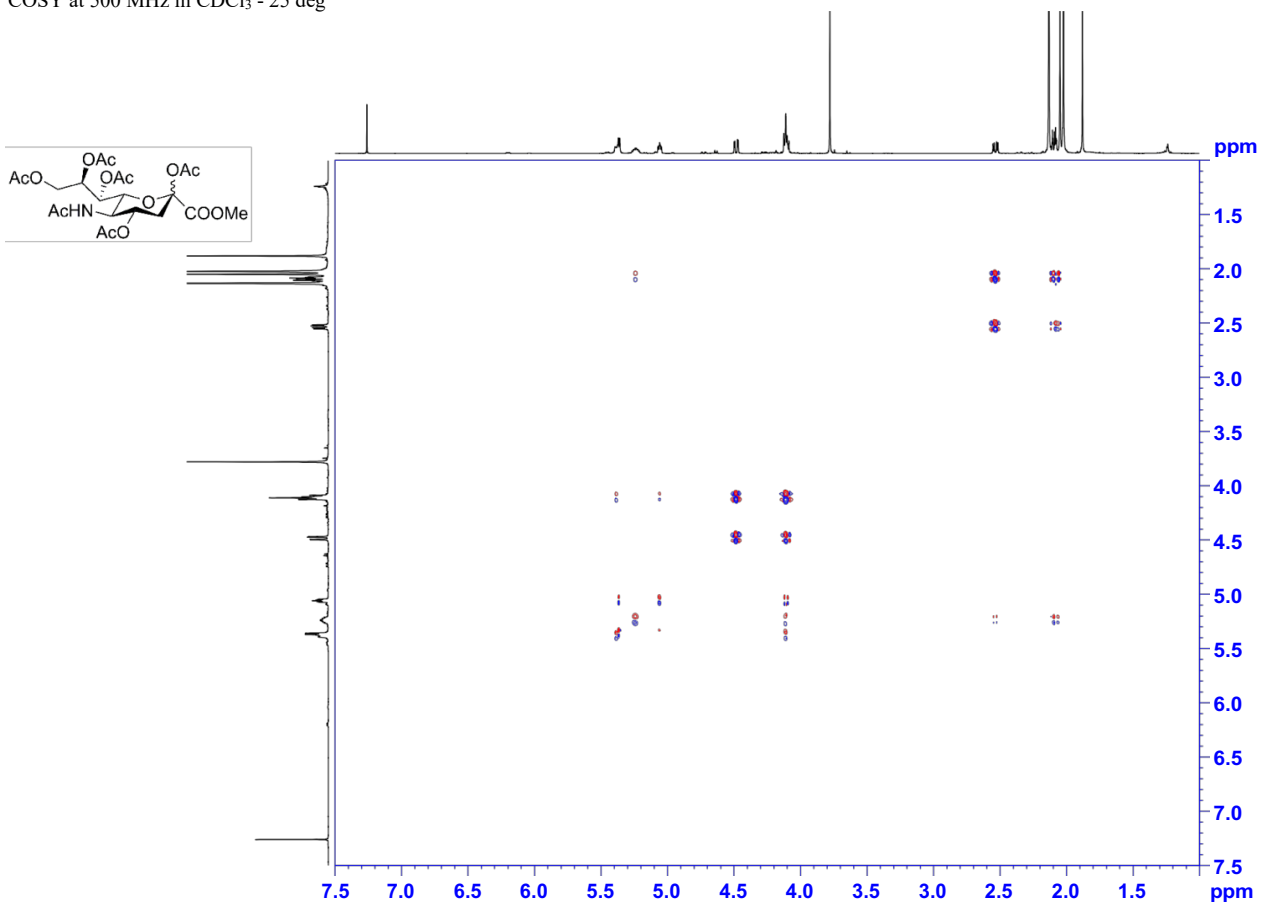

HSQC at 500 MHz in CDCl<sub>3</sub> - 25 deg

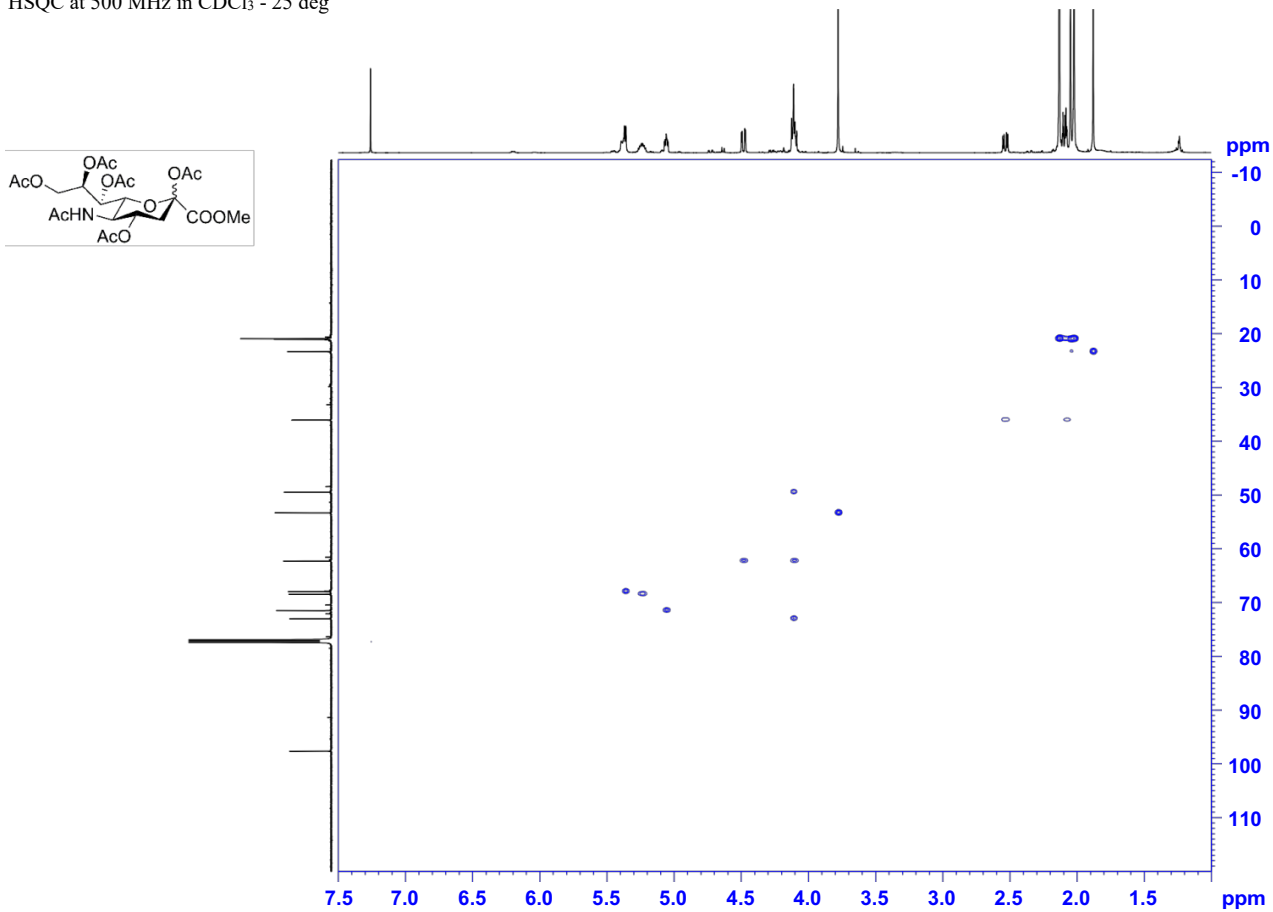

# NMR and ESI-MS spectra of compound 7b

T: ITMS + p ESI Full ms [150.00-2000.00]

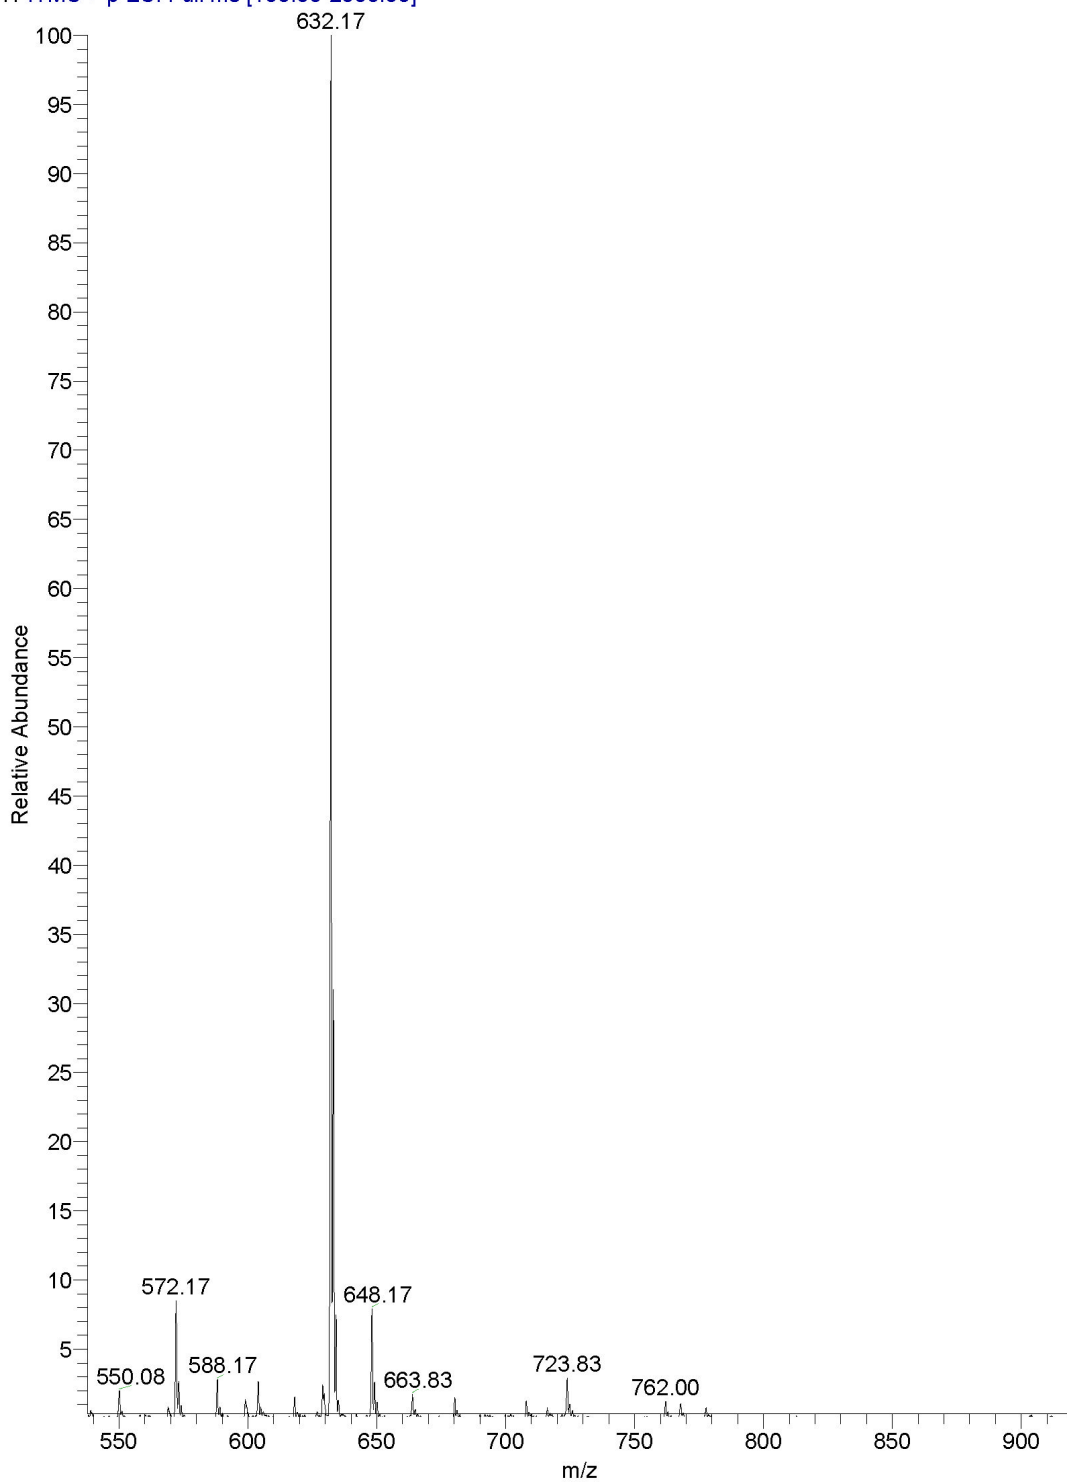

$^1\text{H}$  at 500 MHz in  $\text{CDCl}_3$  - 25 deg

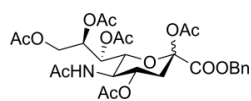

**beta anomer > 90%**

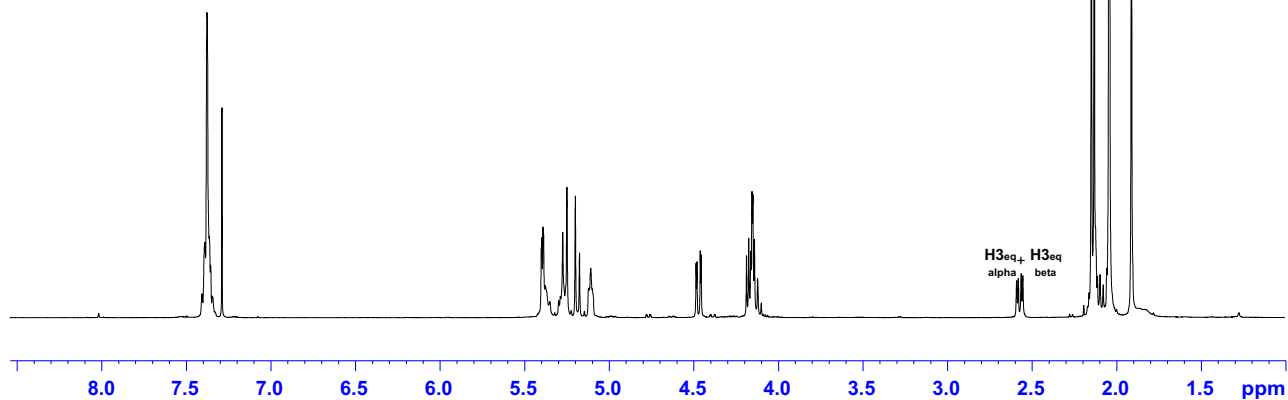

$^{13}\text{C}$  at 125 MHz in  $\text{CDCl}_3$  - 25 deg

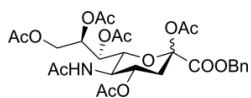

**beta anomer > 90%**

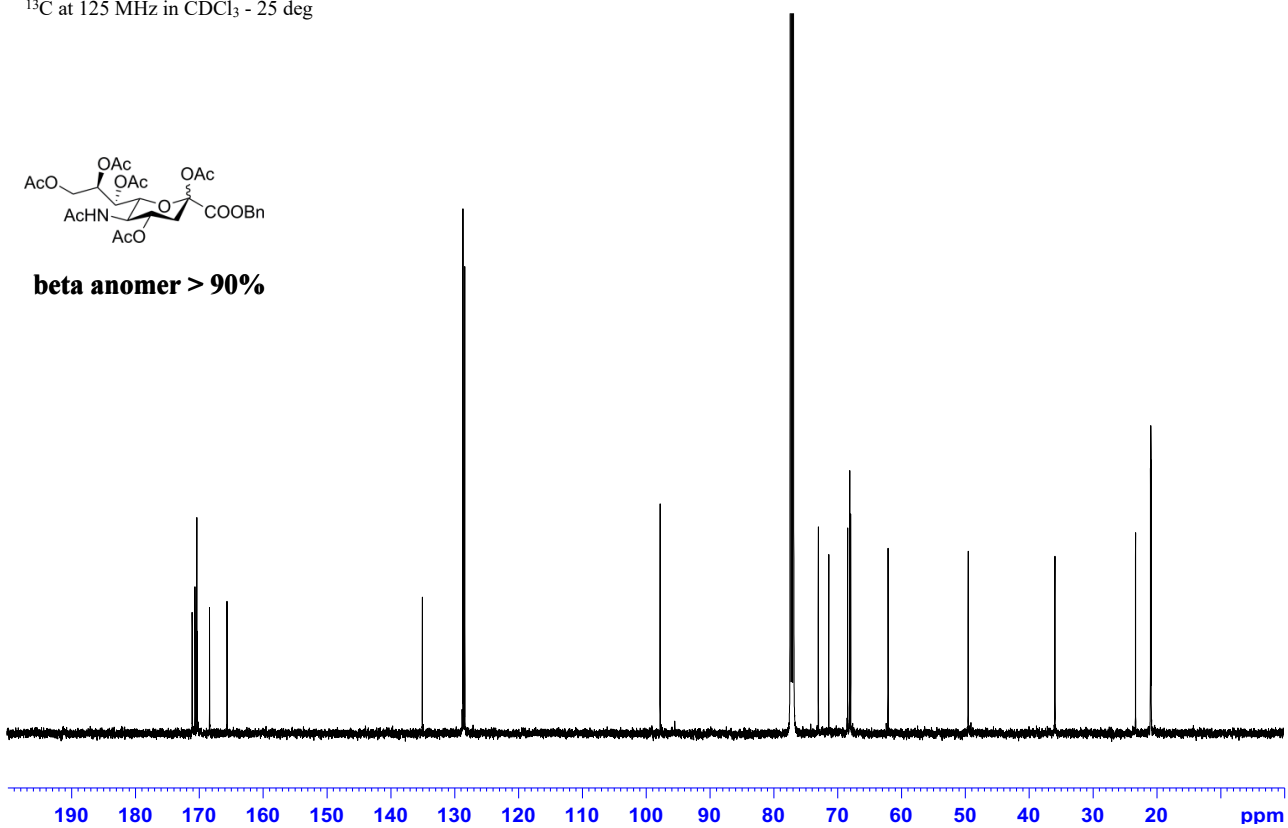

COSY at 500 MHz in CDCl<sub>3</sub> - 25 deg

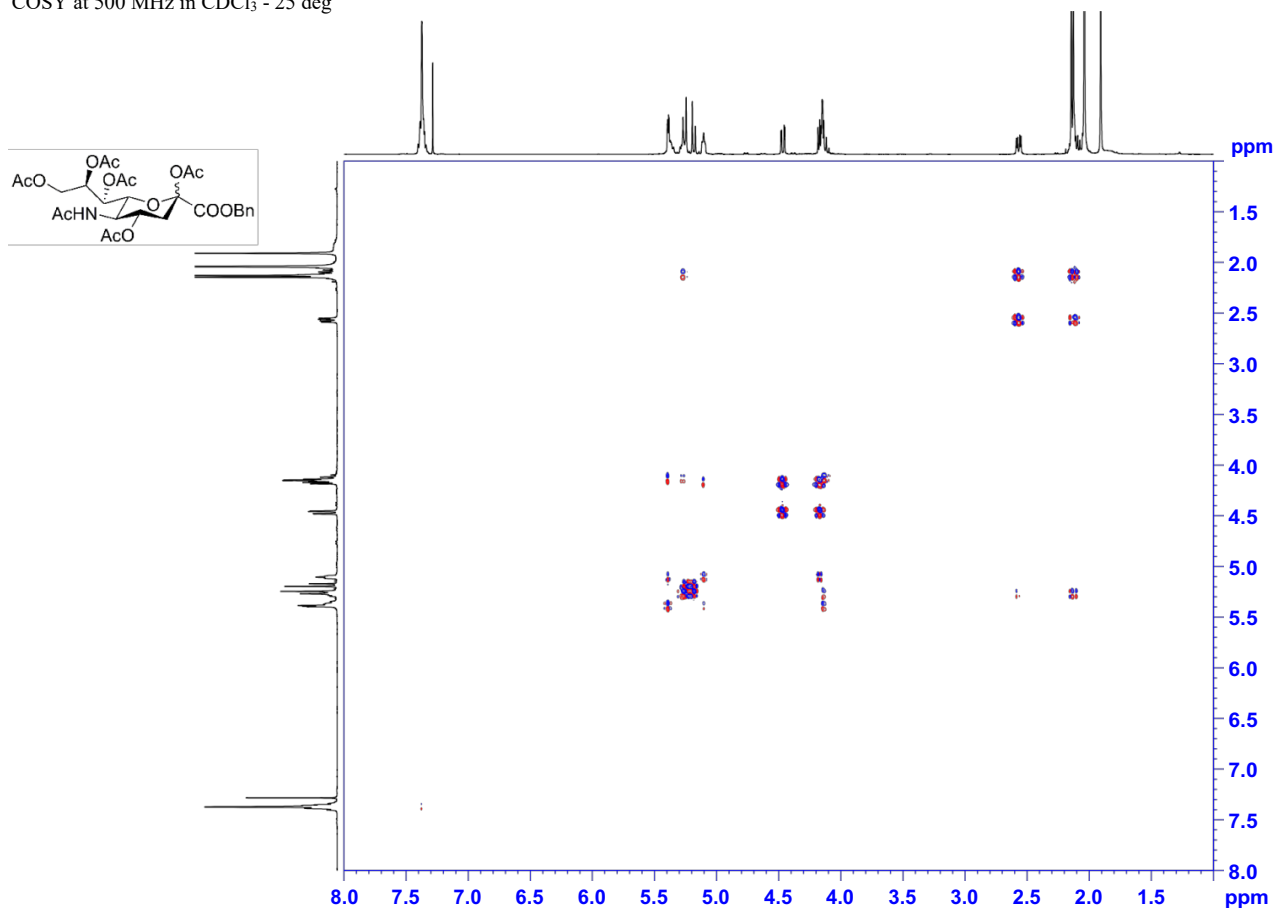

HSQC at 500 MHz in CDCl<sub>3</sub> - 25 deg

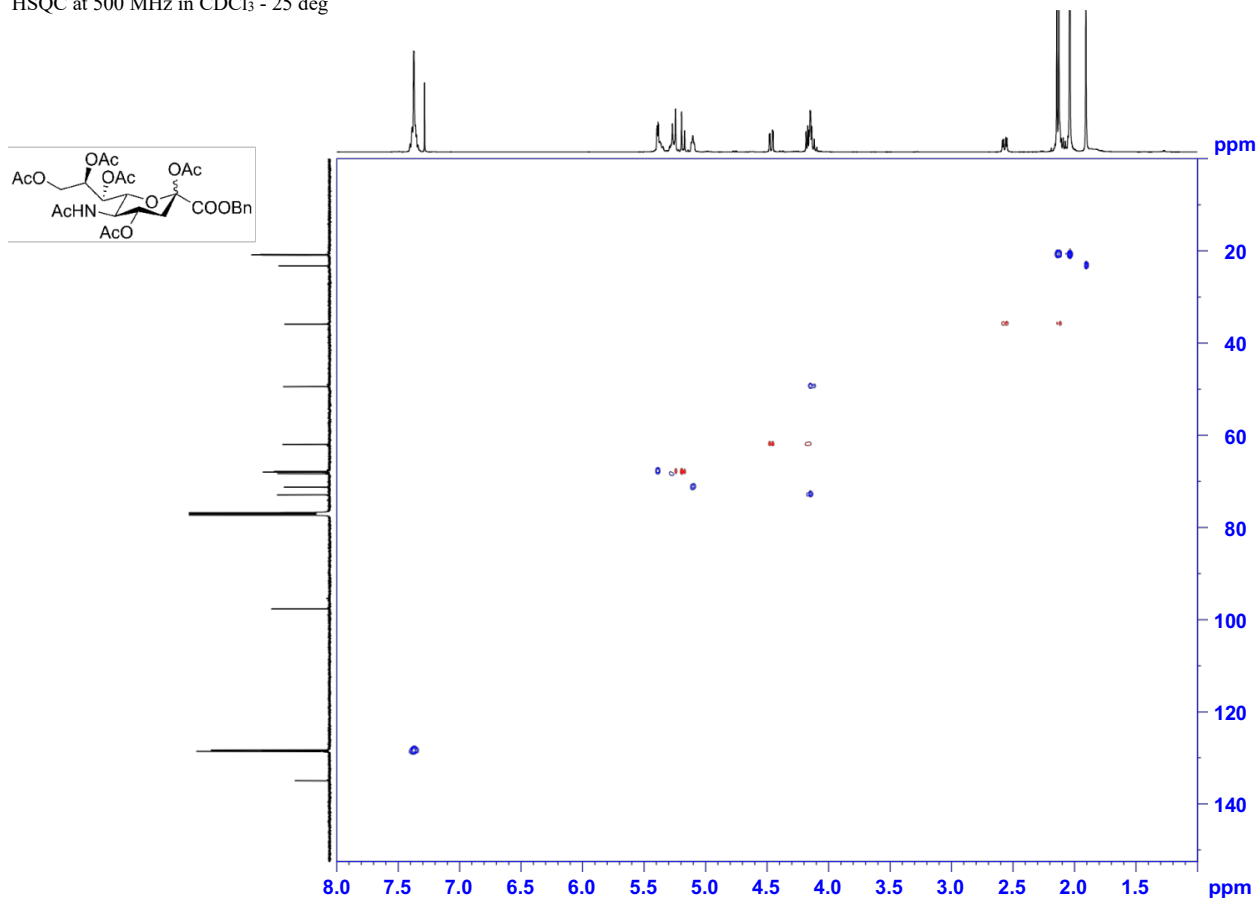

## NMR and ESI-MS spectra of compound 8a

T: ITMS + p ESI Full ms [150.00-2000.00]

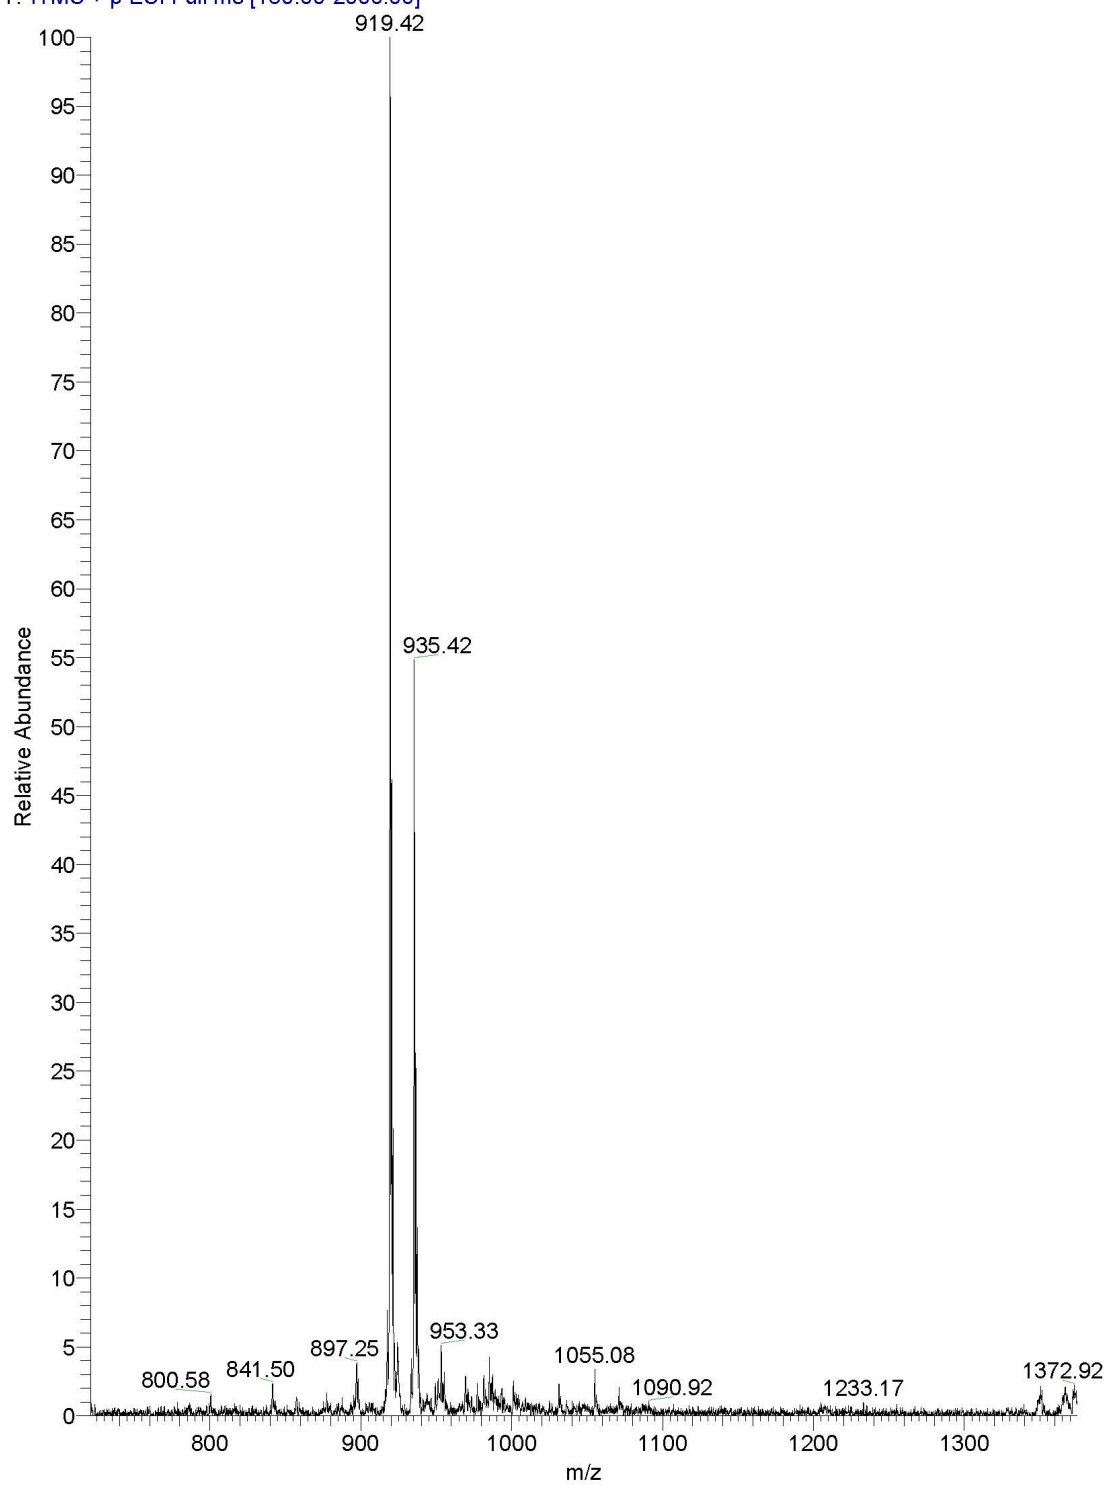

$^1\text{H}$  at 500 MHz in  $\text{CDCl}_3$  - 25 deg

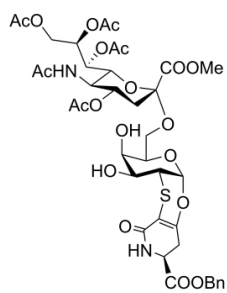

**alpha anomer 10%**  
**beta anomer 90%**

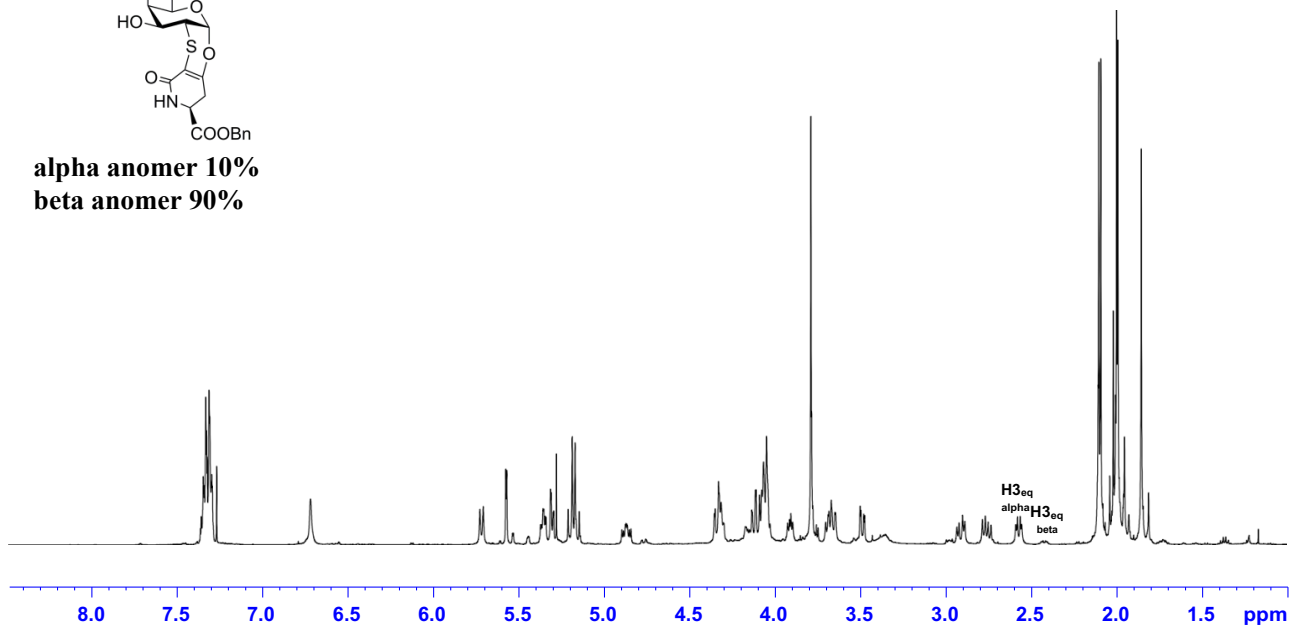

$^{13}\text{C}$  at 125 MHz in  $\text{CDCl}_3$  - 25 deg

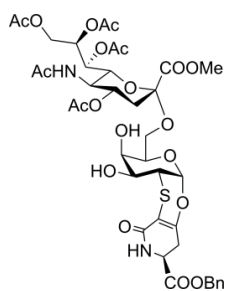

**alpha anomer 10%**  
**beta anomer 90%**

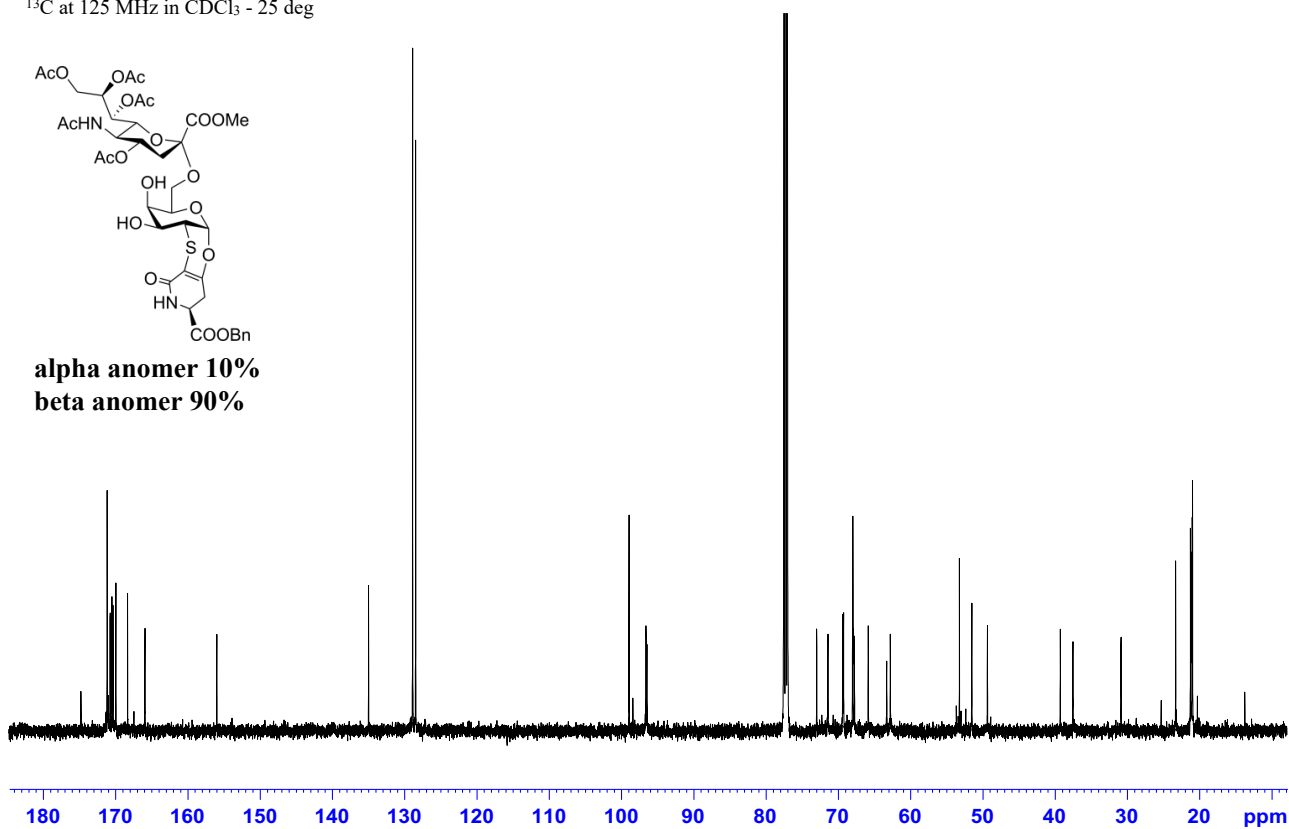

DEPT at 125 MHz in CDCl<sub>3</sub> - 25 deg

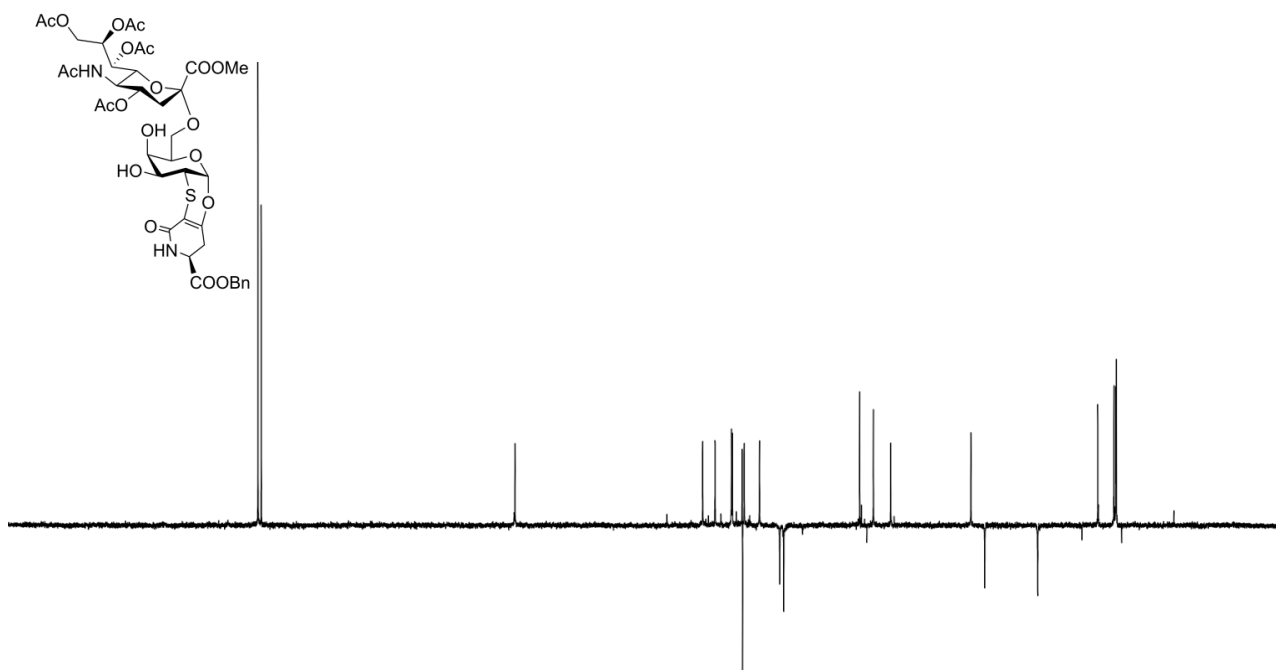

COSY at 500 MHz in CDCl<sub>3</sub> - 25 deg

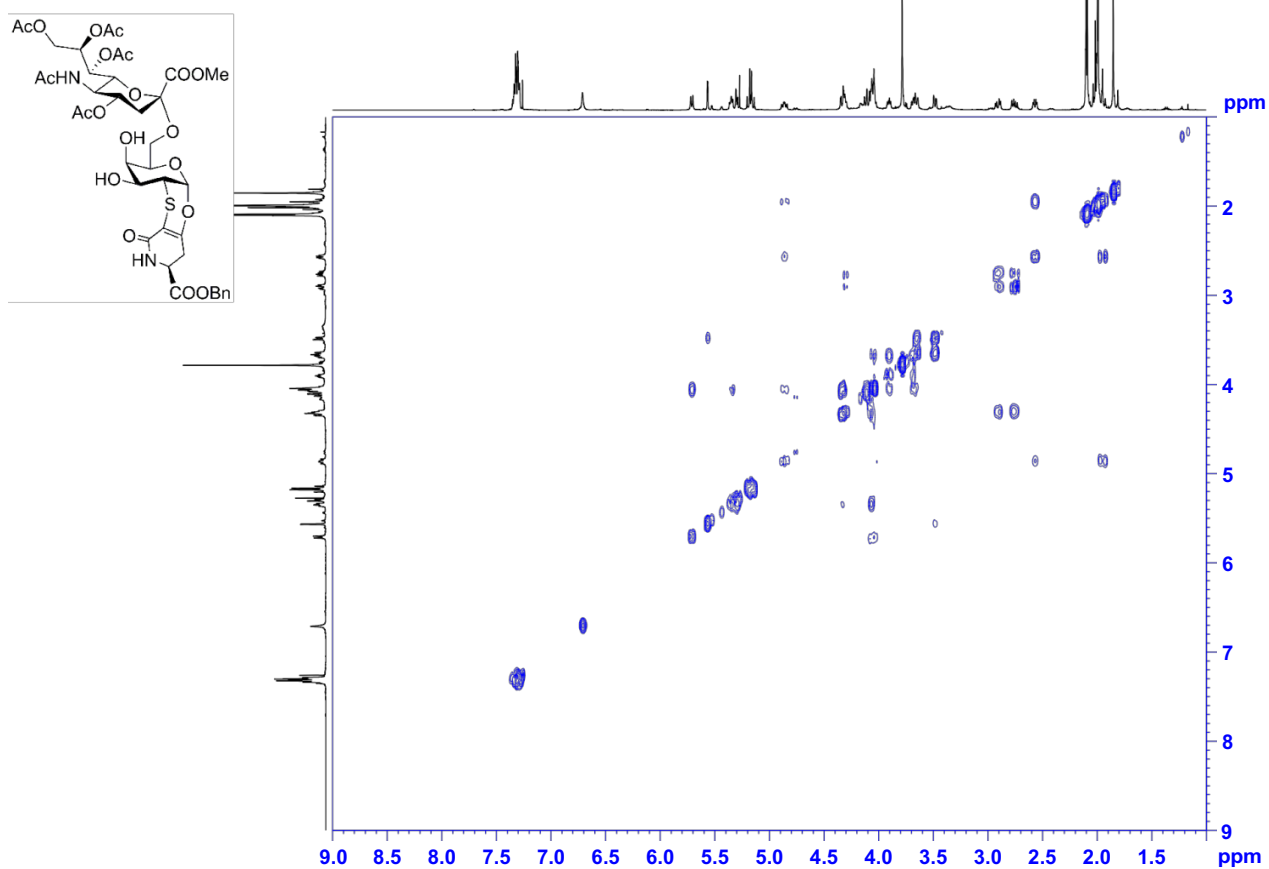

HSQC at 500 MHz in CDCl<sub>3</sub> - 25 deg

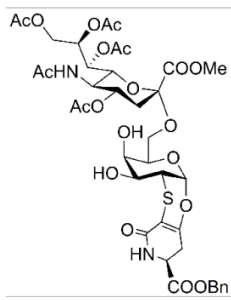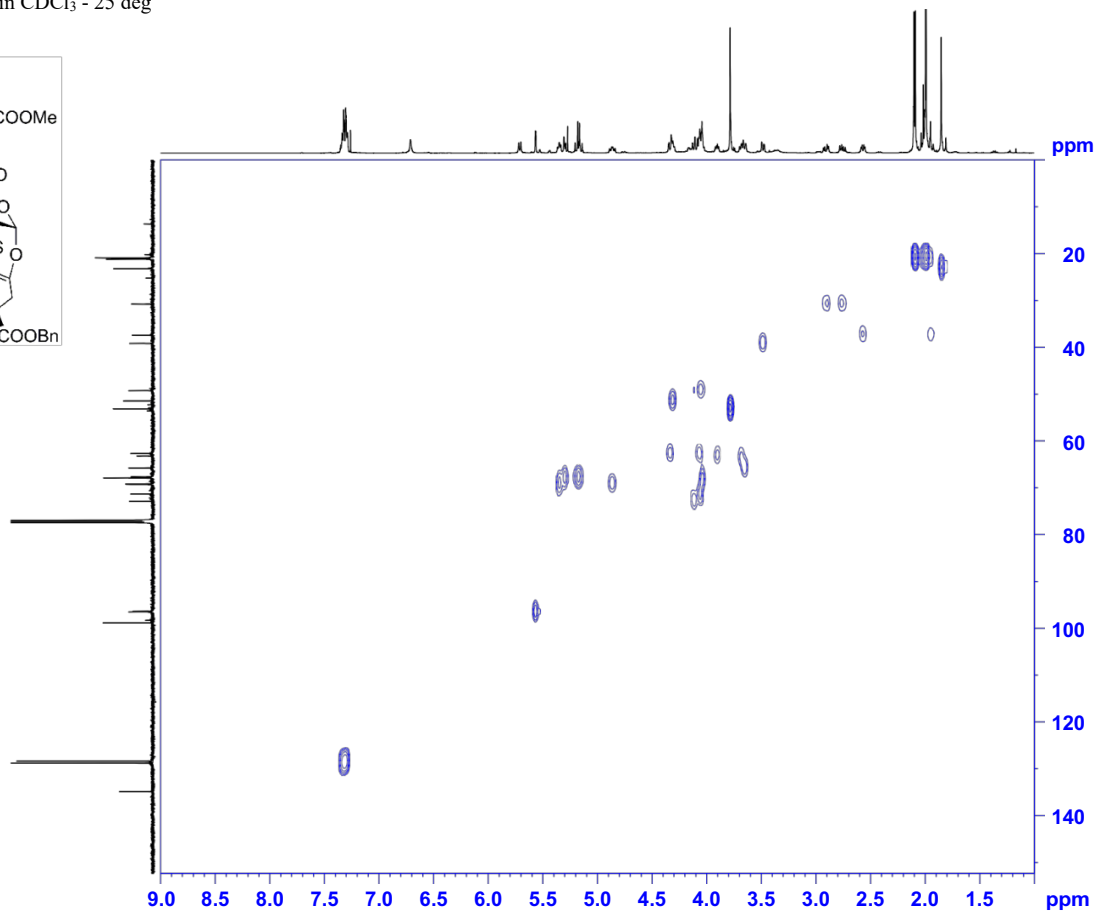



## NMR and ESI-MS spectra of compound 8b

T: ITMS + p ESI Full ms [150.00-2000.00]

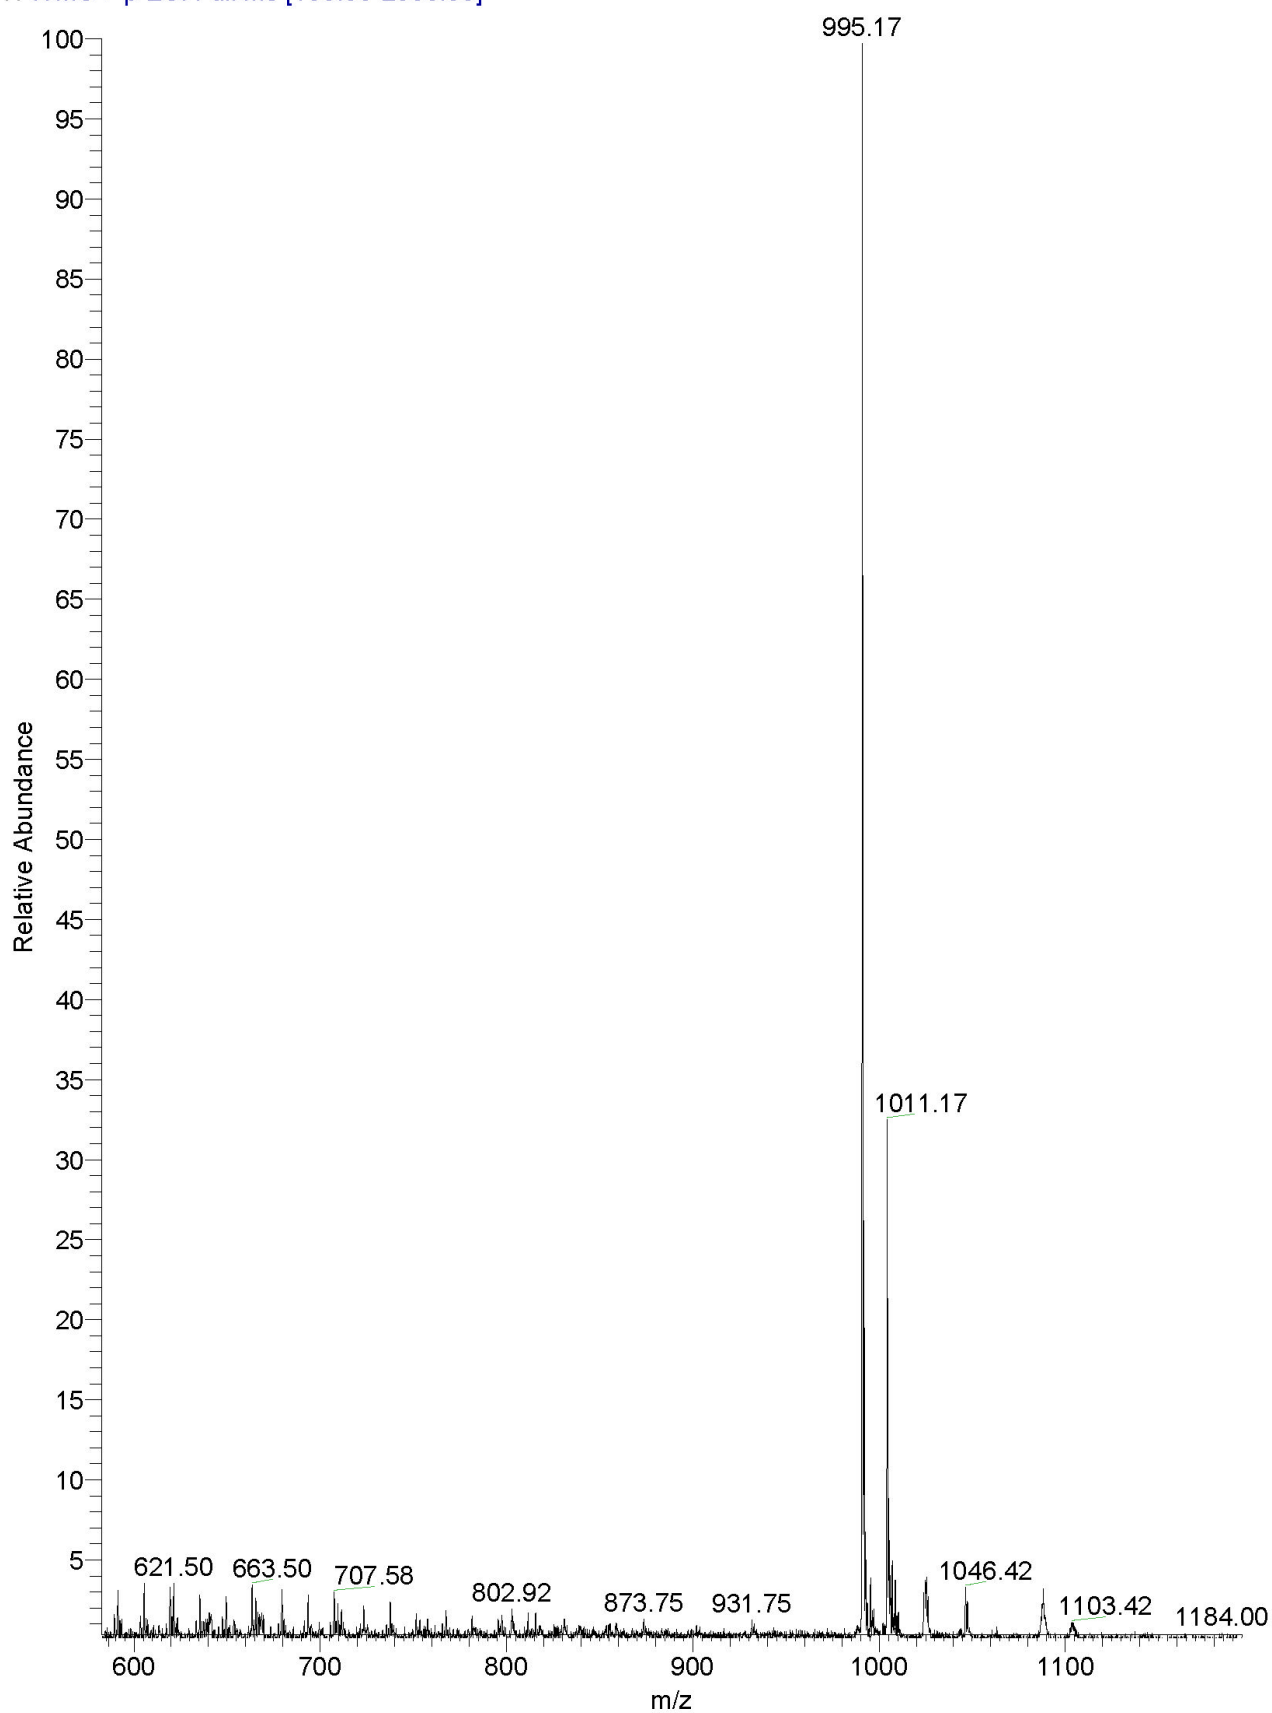

$^1\text{H}$  at 500 MHz in  $\text{CDCl}_3$  - 25 deg

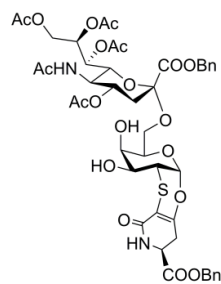

5.640  
5.611

>95% pure by  $^1\text{H}$  NMR

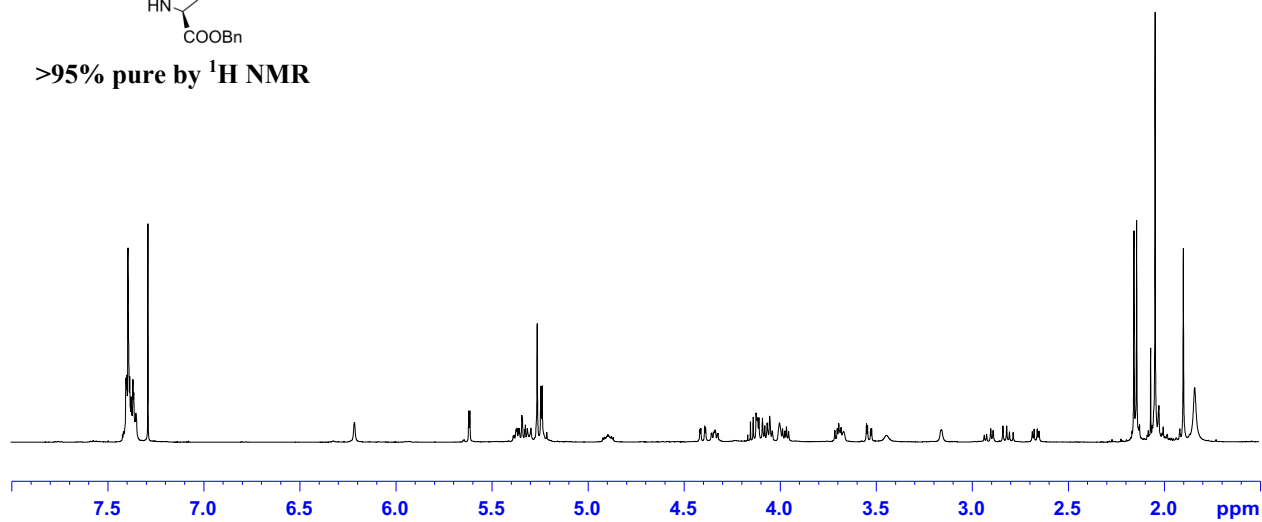

$^{13}\text{C}$  at 125 MHz in  $\text{CDCl}_3$  - 25 deg

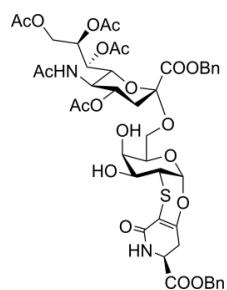

0.94  
0.96

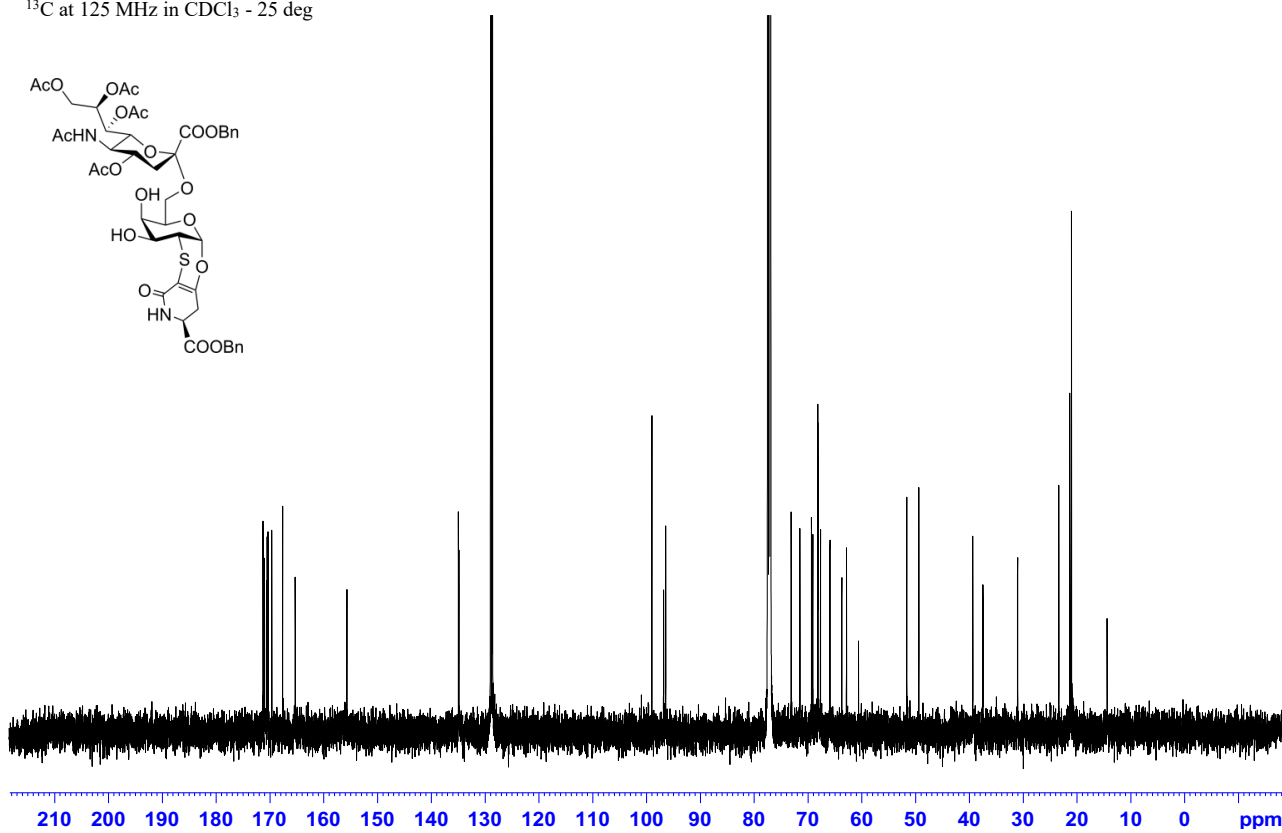

COSY at 500 MHz in CDCl<sub>3</sub> - 25 deg

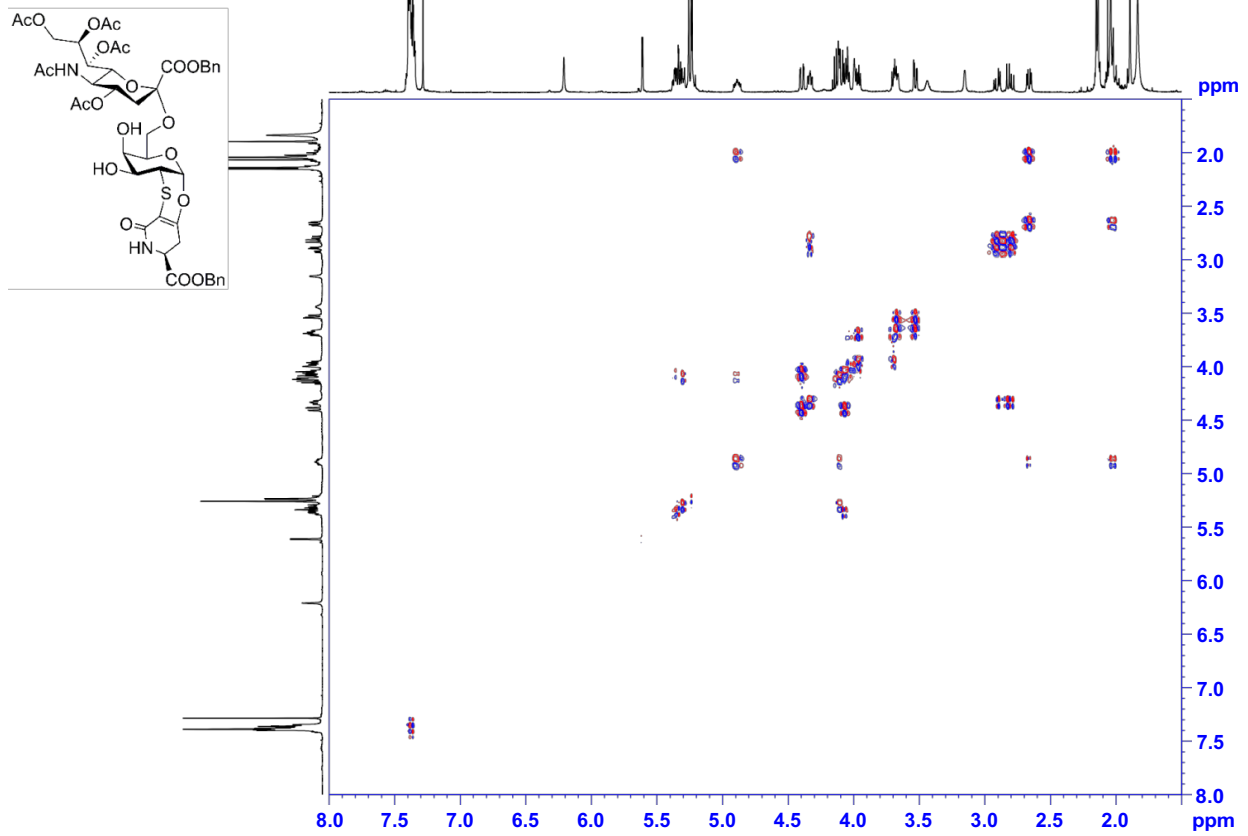

HSQC at 500 MHz in CDCl<sub>3</sub> - 25 deg

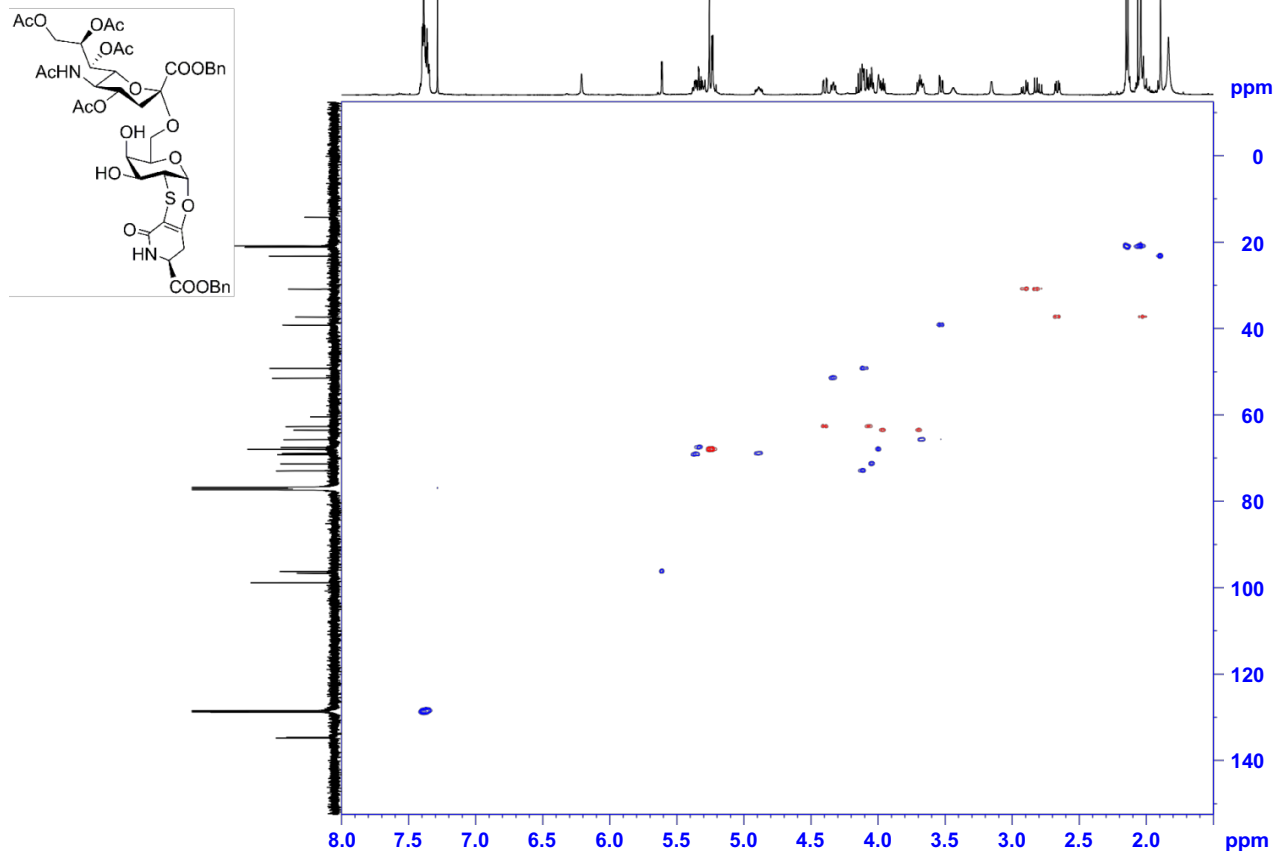

# NMR and ESI-MS spectra of compound 10

T: ITMS - p ESI Full ms [150.00-2000.00]

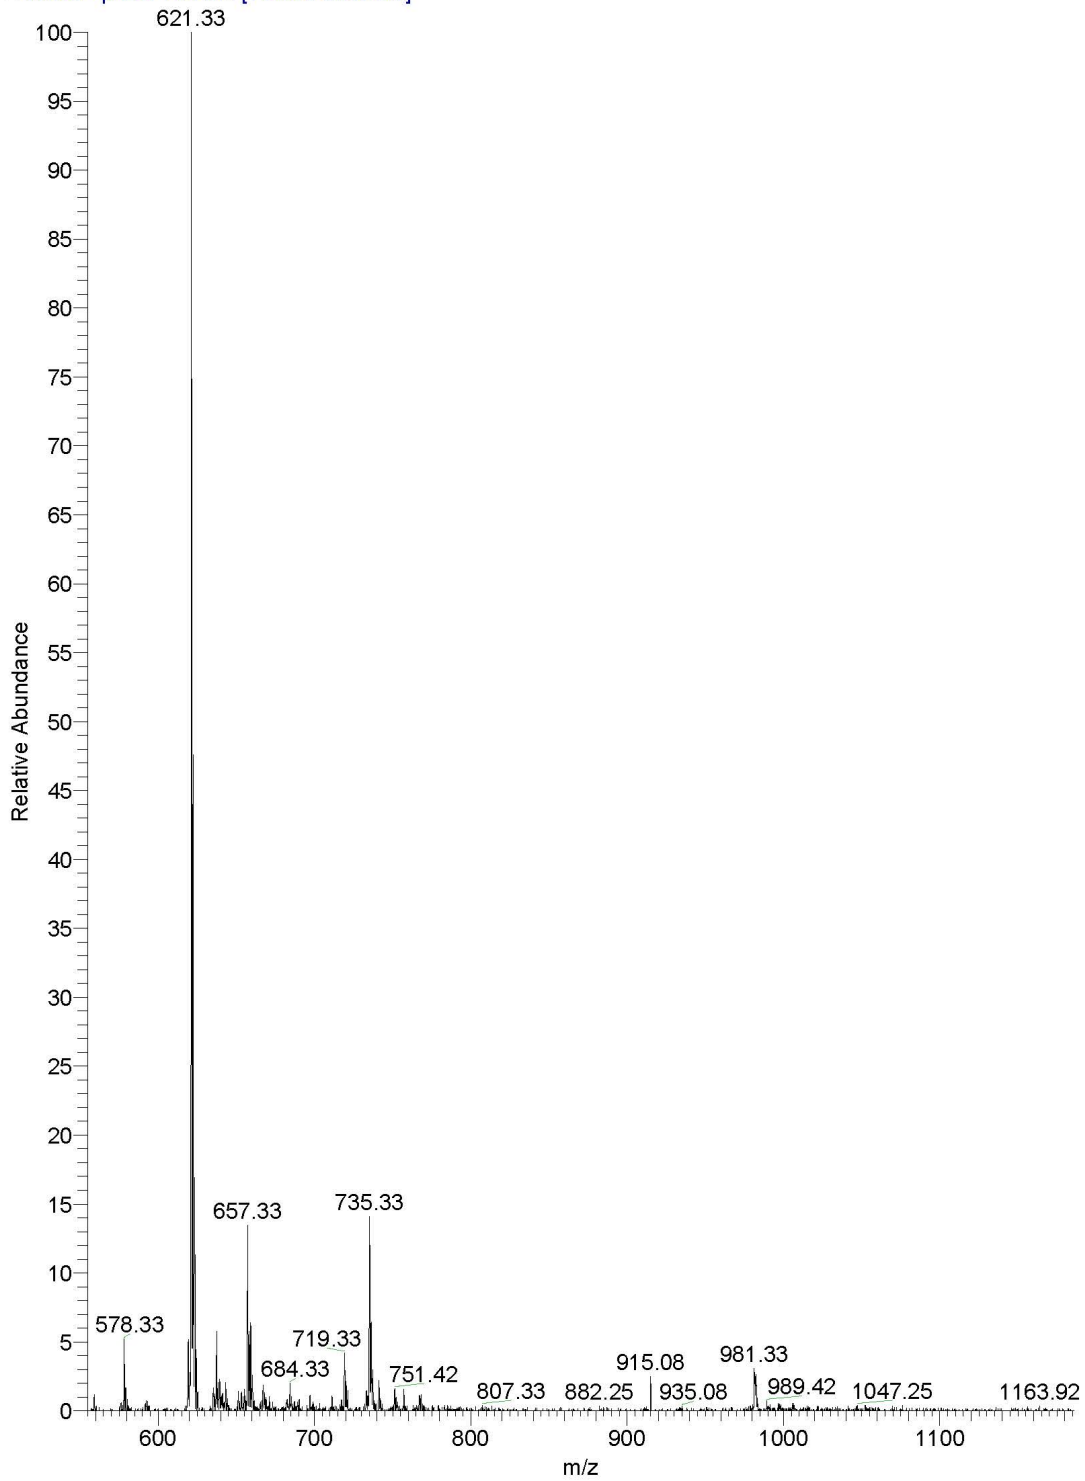

$^1\text{H}$  at 500 MHz in  $\text{D}_2\text{O}$  - 25 deg

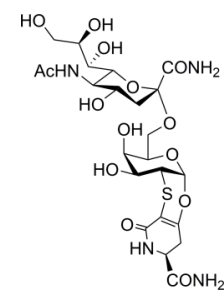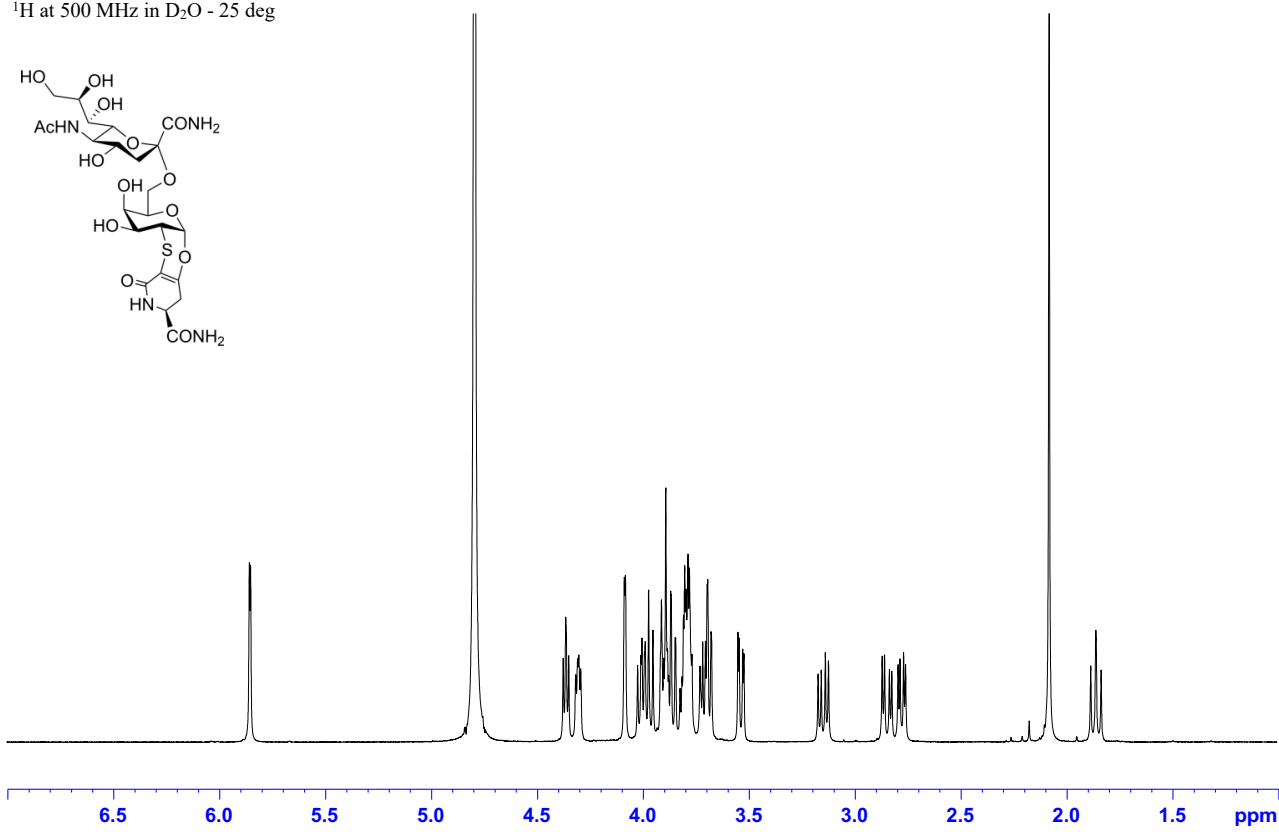

$^{13}\text{C}$  at 125 MHz in  $\text{D}_2\text{O}$  - 25 deg

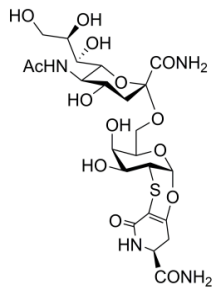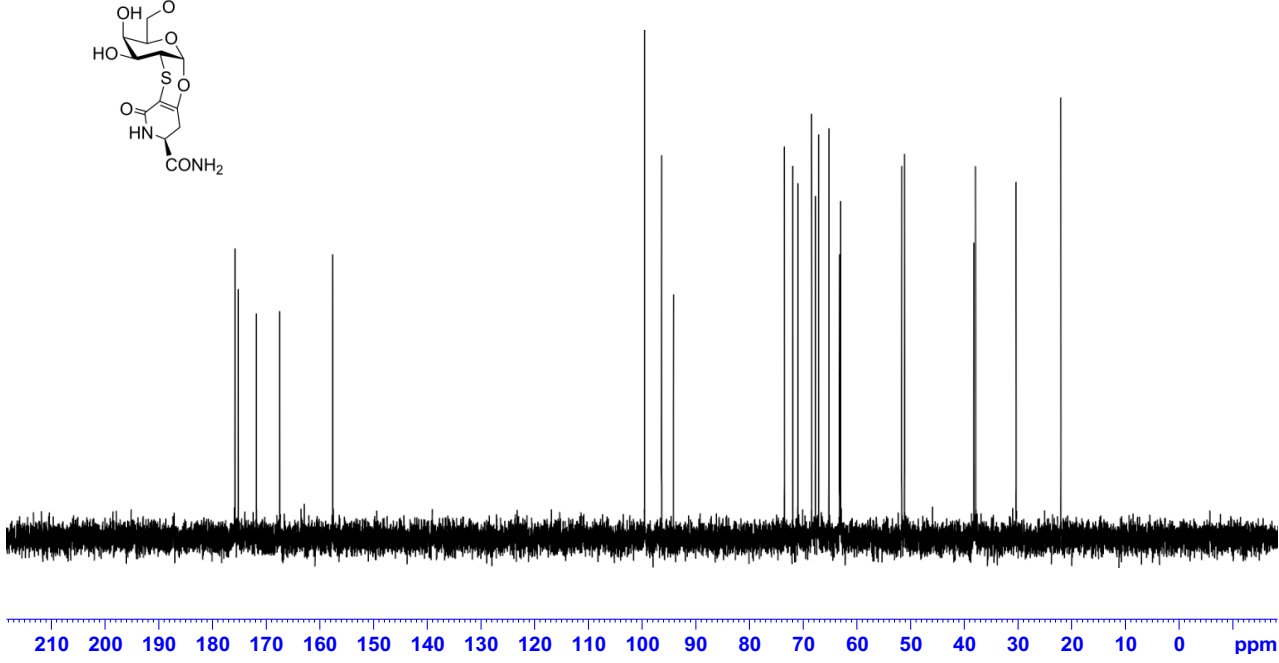

COSY at 500 MHz in D<sub>2</sub>O - 25 deg

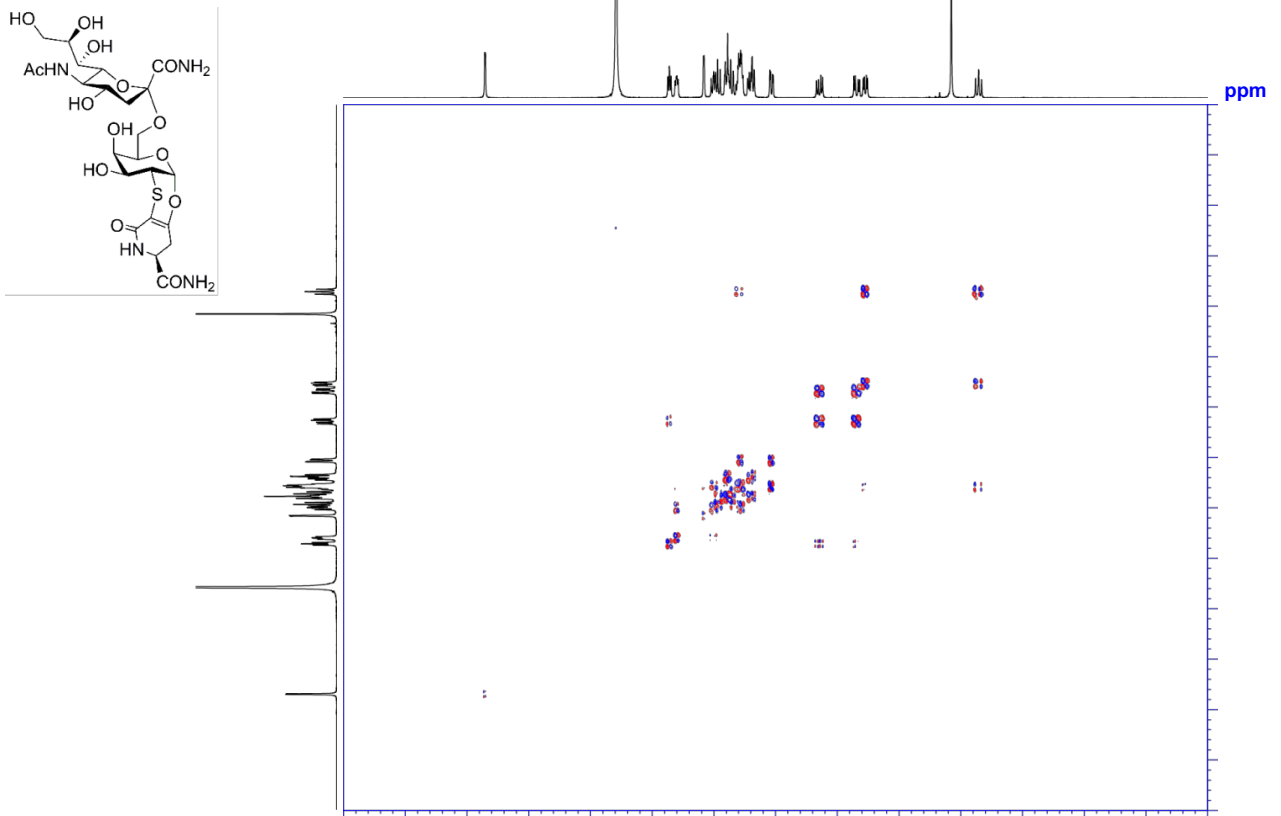

HSQC at 500 MHz in D<sub>2</sub>O - 25 deg

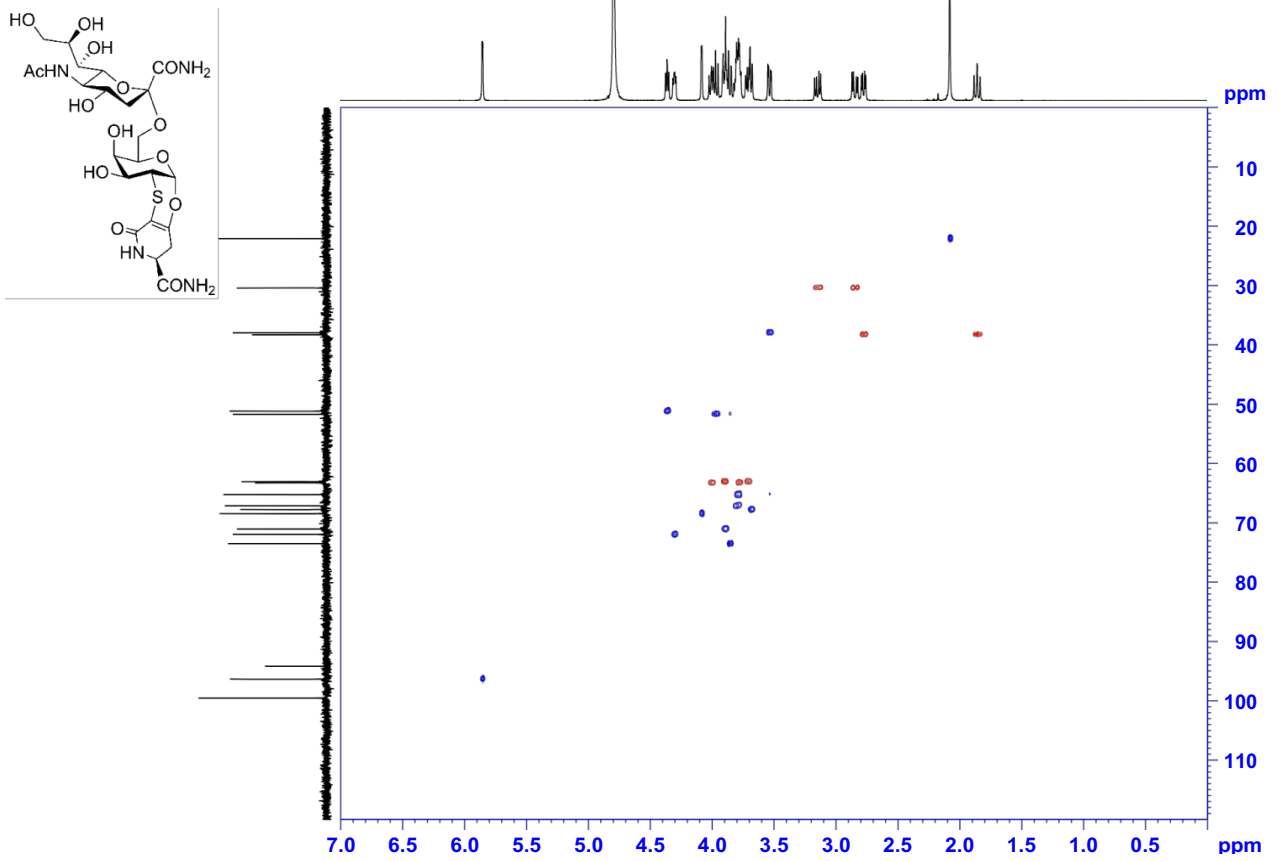

## NMR and ESI-MS spectra of compound 11

T: ITMS - p ESI Full ms [150.00-2000.00]

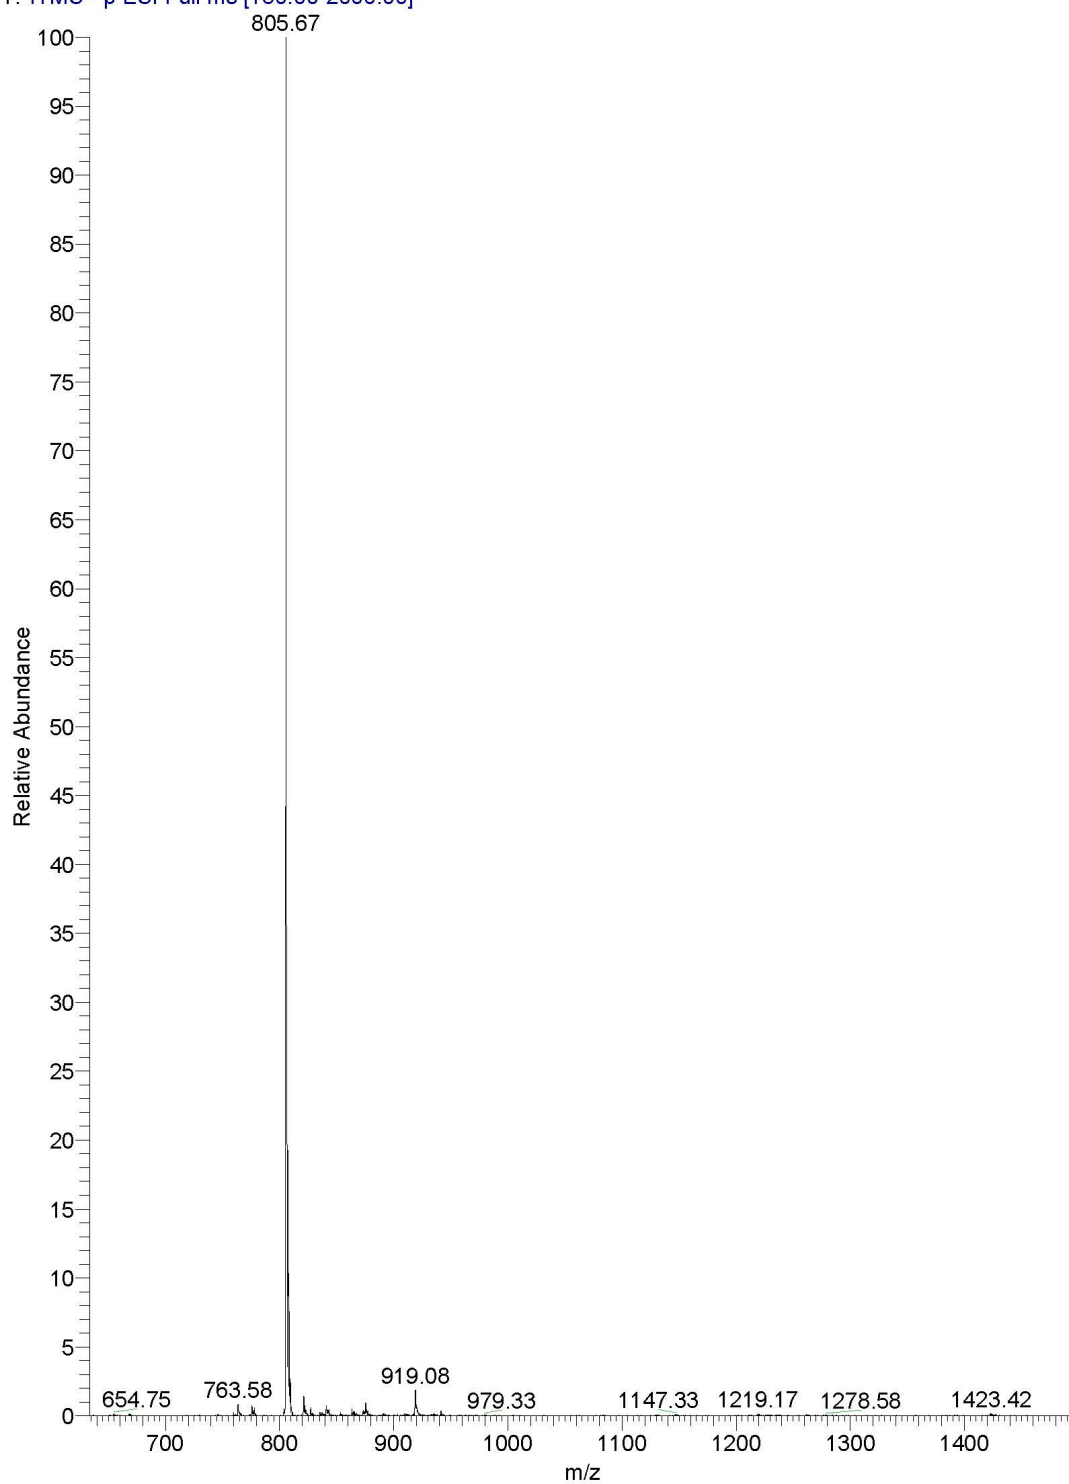

$^1\text{H}$  at 500 MHz in  $\text{CD}_3\text{OD}$  - 25 deg

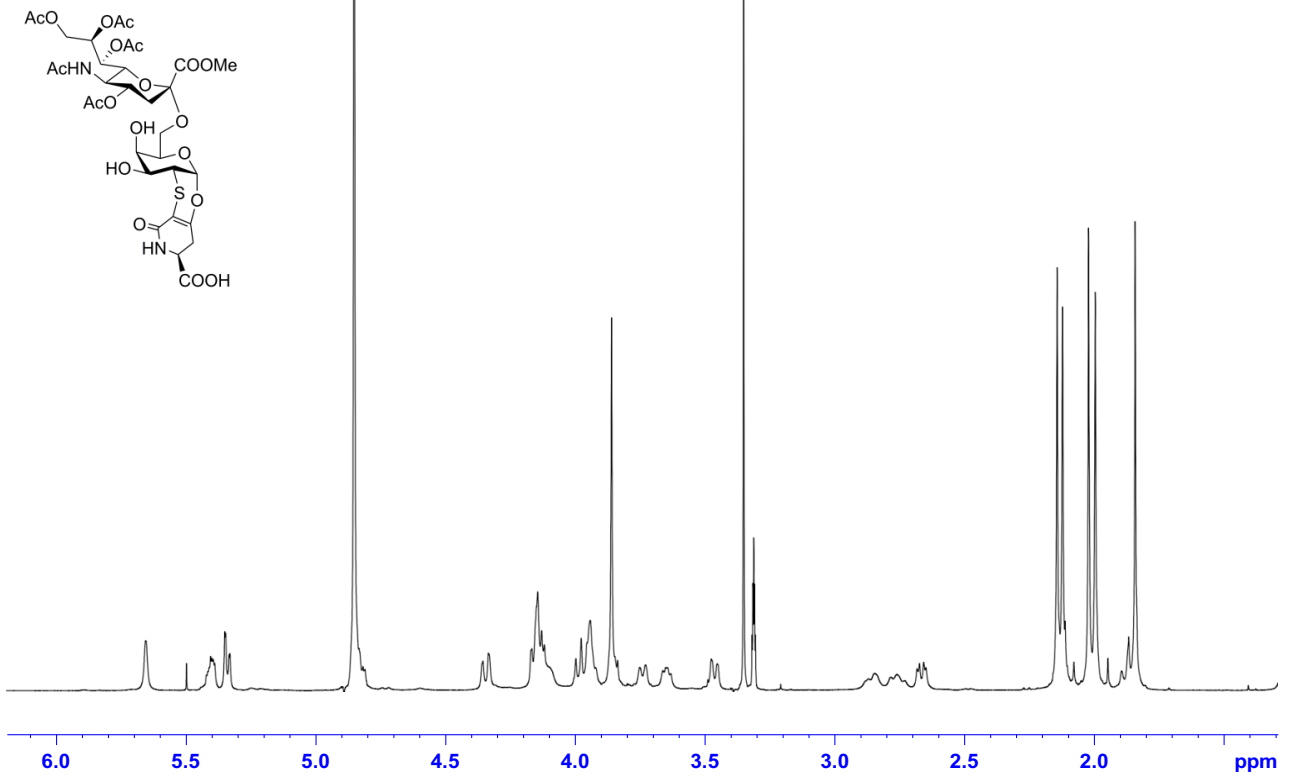



## NMR and ESI-MS spectra of compound 12

T: ITMS - p ESI Full ms [150.00-2000.00]

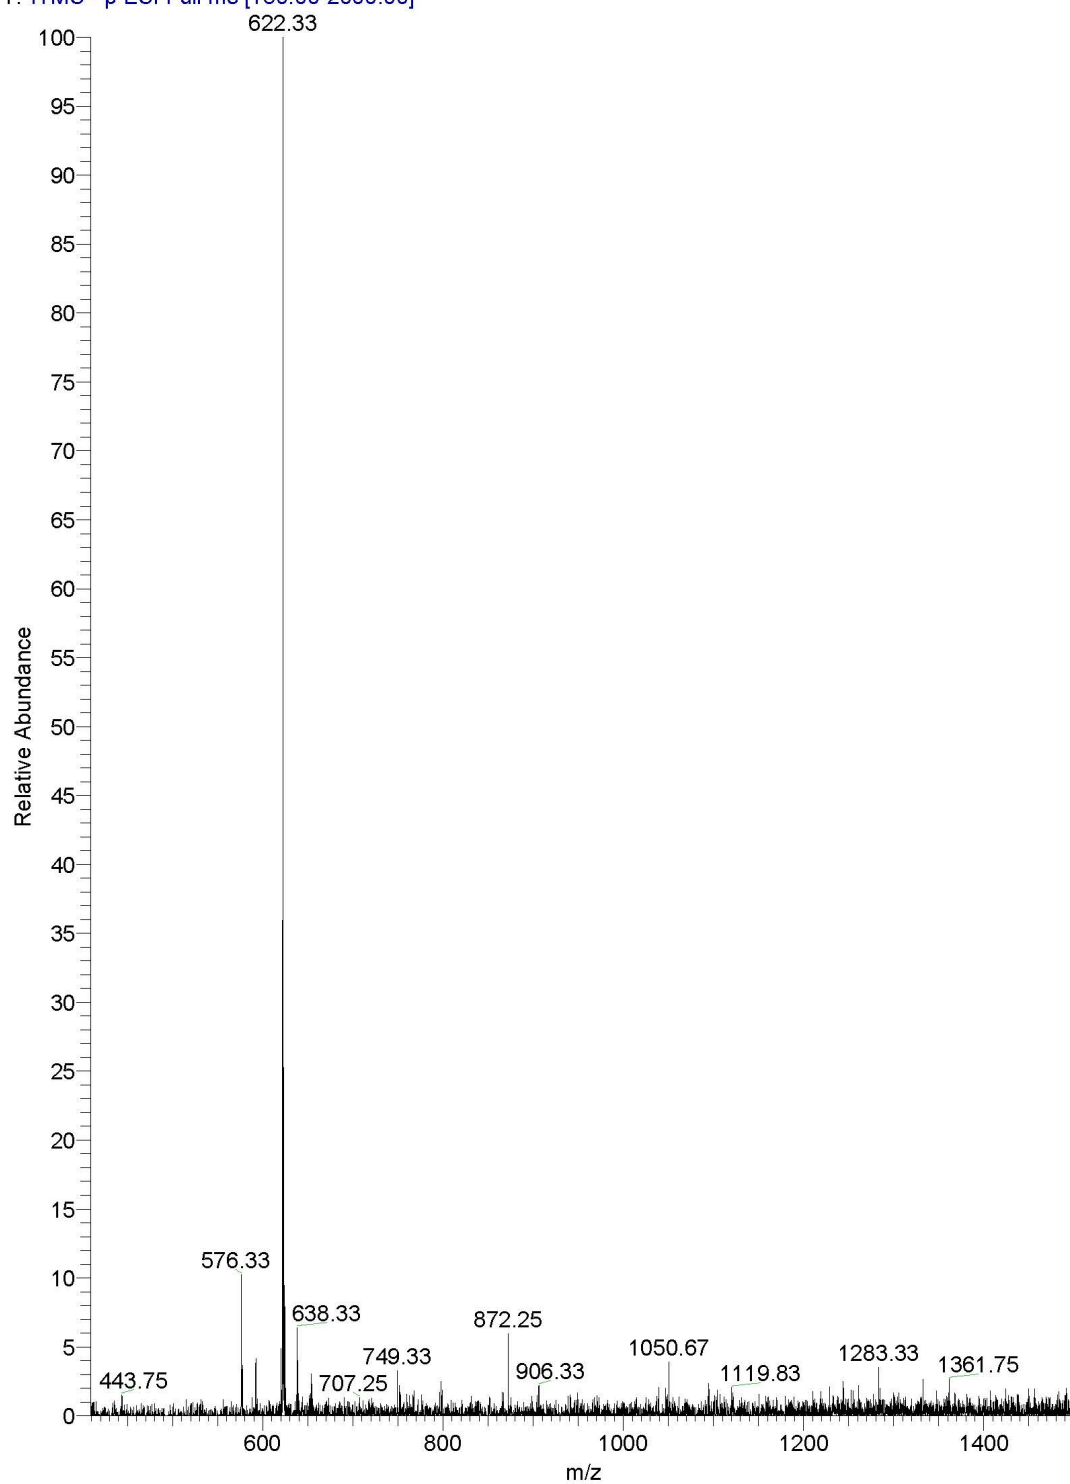

$^1\text{H}$  at 500 MHz in  $\text{D}_2\text{O}$  - 25 deg

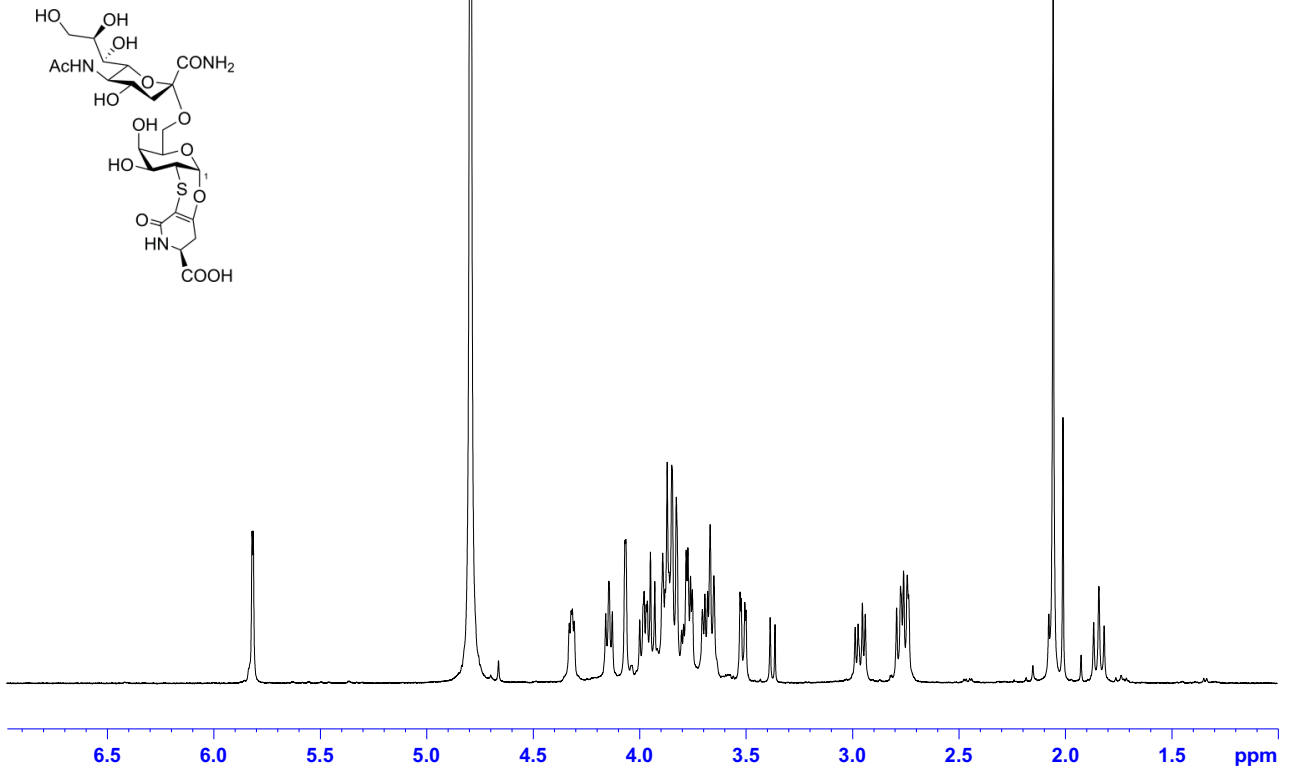

$^{13}\text{C}$  at 125 MHz in  $\text{D}_2\text{O}$  - 25 deg

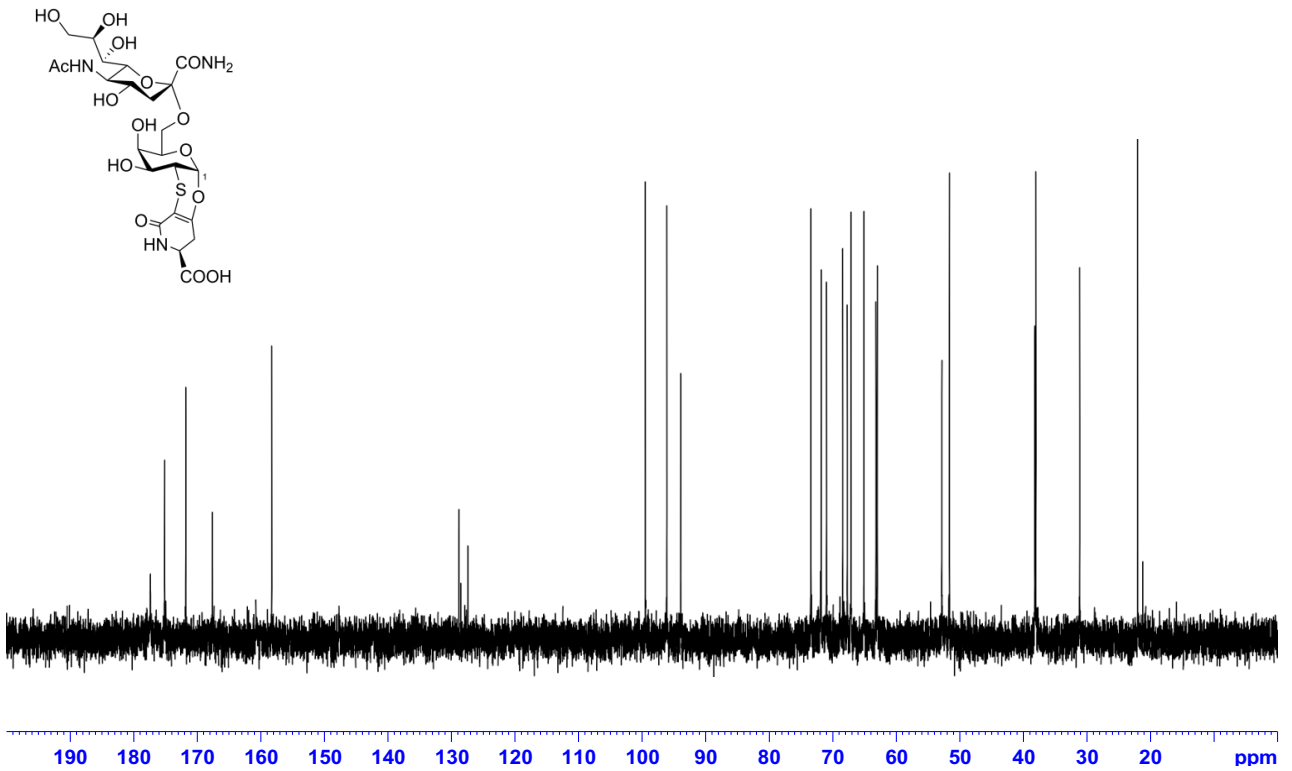

COSY at 500 MHz in D<sub>2</sub>O - 25 deg

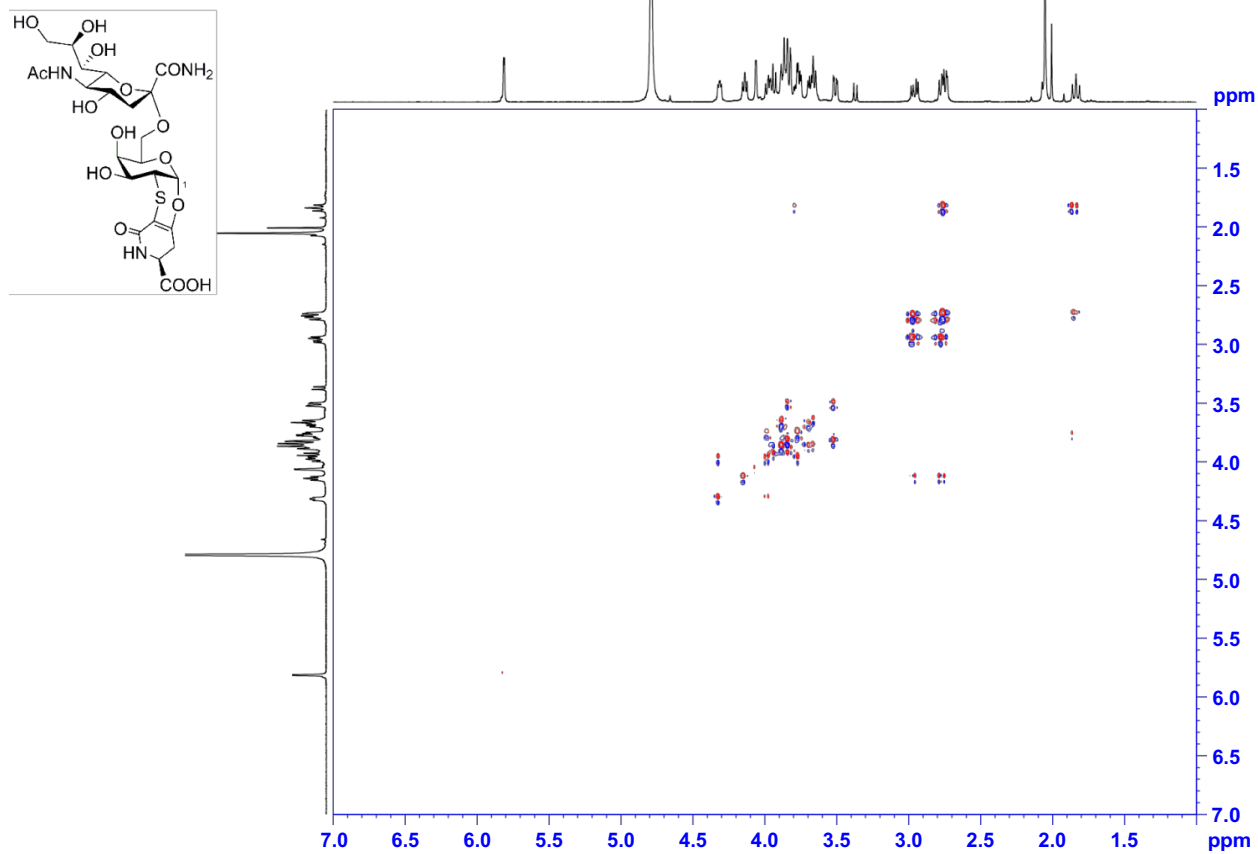

HSQC at 500 MHz in D<sub>2</sub>O - 25 deg

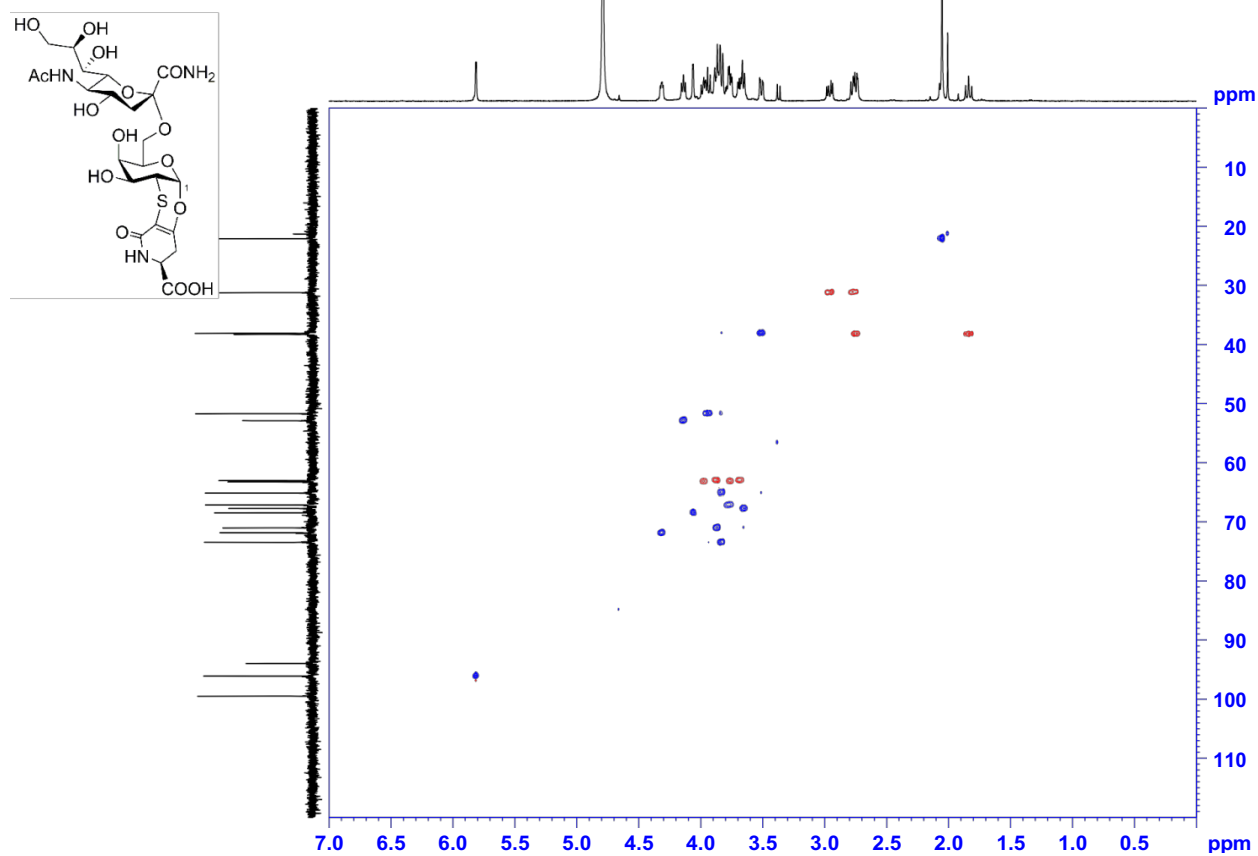

## NMR and ESI-MS spectra of compound 13

T: ITMS - p ESI Full ms [150.00-2000.00]

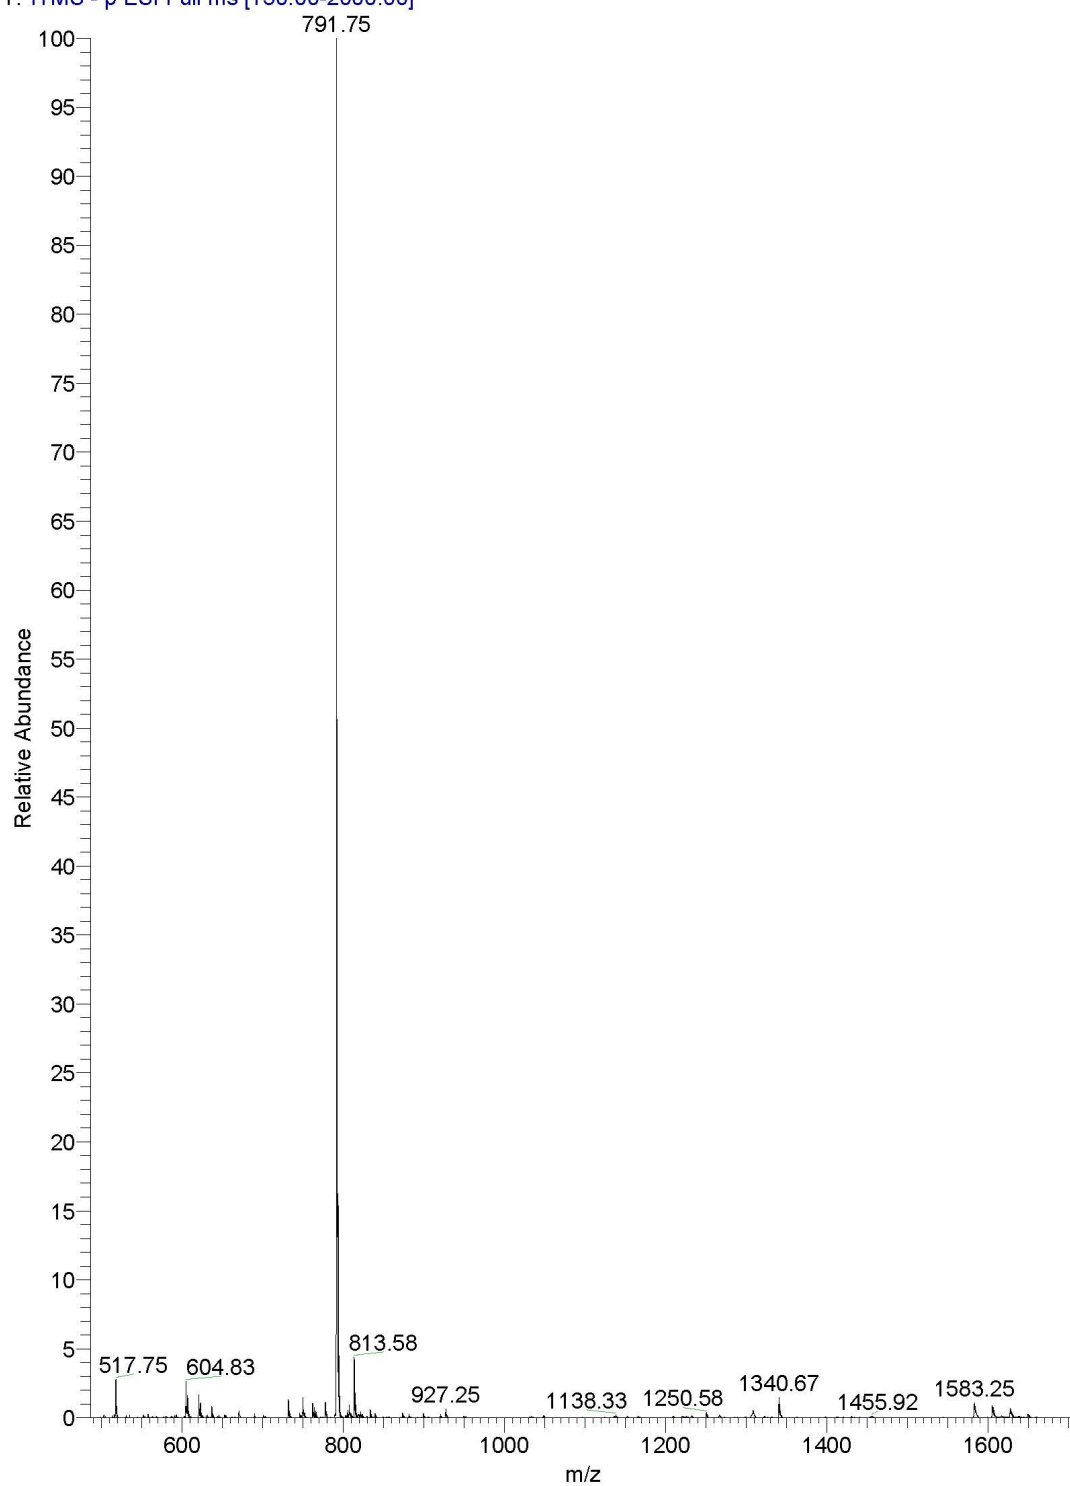

$^1\text{H}$  at 500 MHz in  $\text{CD}_3\text{OD}$  - 25 deg

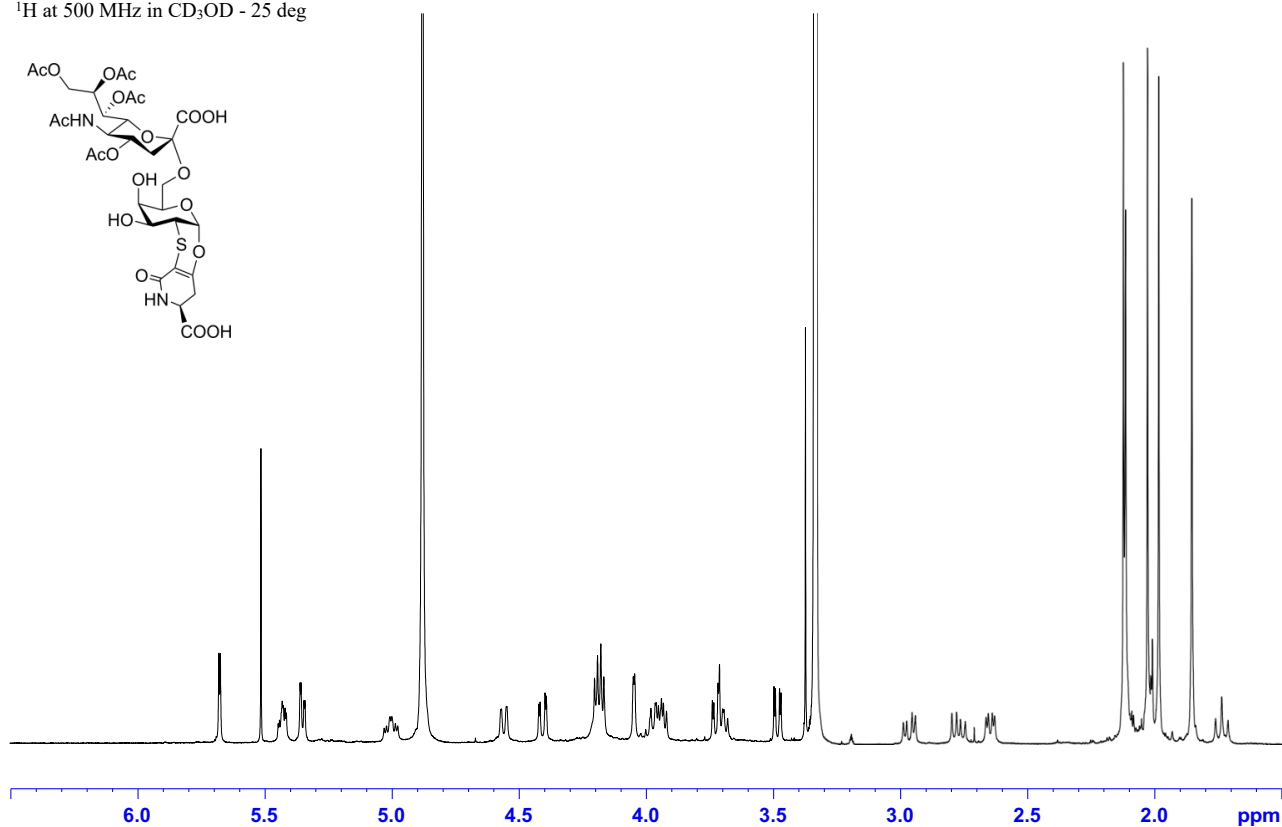

## References

1. Xu, X.; Zhu, X.; Dwek, R.A.; Stevens, J.; Wilson, I.A. Structural Characterization of the 1918 Influenza Virus H1N1 Neuraminidase. *J. Virol.* **2008**, *82*, 10493–10501.
2. Jakalian, A.; Jack, D.B.; Bayly, C.I. Fast, efficient generation of high-quality atomic charges. AM1-BCC model: II. Parameterization and validation. *J Comput Chem* **2002**, *23*, 1623–1641.
3. Lafite, P.; André, F.; Zeldin, D.C.; Dansette, P.M.; Mansuy, D. Unusual Regioselectivity and Active Site Topology of Human Cytochrome P450 2J2 †. *Biochemistry* **2007**, *46*, 10237–10247.
4. Maier, J.A.; Martinez, C.; Kasavajhala, K.; Wickstrom, L.; Hauser, K.E.; Simmerling, C. ff14SB: Improving the Accuracy of Protein Side Chain and Backbone Parameters from ff99SB. *J. Chem. Theory Comput.* **2015**, *11*, 3696–3713.
5. Phillips, J.C.; Braun, R.; Wang, W.; Gumbart, J.; Tajkhorshid, E.; Villa, E.; Chipot, C.; Skeel, R.D.; Kale, L.; Schulten, K. Scalable molecular dynamics with NAMD. *J Comput Chem* **2005**, *26*, 1781–1802.
